# Supplementary material for: Large-scale genomic analysis of the domestic dog informs biological discovery
Source: HighWire-hosted journal article supplement (doi:10.1101/gr.278569.123), 2024-06-01
Supplement: Supplemental_Table_S1.xlsx [file Supplemental_Table_S1.xlsx]

## Sheet: sra_data
Supplemental Table S1: List of publicly available paired-end Illumina WGS samples on SRA.
Species	BioProject	BioSample	Release Date	Sequence Depth
Canis familiaris	PRJEB2162	SAMEA676101	2010-09-24	6.15949
Canis familiaris	PRJEB2162	SAMEA676114	2010-09-24	10.9888
Canis familiaris	PRJEB2162	SAMEA676116	2010-09-24	0.541102
Canis familiaris	PRJEB2162	SAMEA676117	2010-09-24	0.606136
Canis familiaris	PRJEB2162	SAMEA676118	2010-09-24	0.140926
Canis familiaris	PRJEB2162	SAMEA676121	2010-09-24	5.29606
Canis familiaris	PRJEB2162	SAMEA676105	2010-12-16	45.453
Canis familiaris	PRJEB2162	SAMEA676122	2010-12-16	124.469
Canis familiaris	PRJEB2162	SAMEA1016575	2012-04-15	0.117287
Canis familiaris	PRJDB2266	SAMD00009664	2012-06-01	43.023
Canis familiaris	PRJEB2311	SAMEA1561463	2012-12-14	4.69763
Canis familiaris	PRJEB2311	SAMEA1561427	2012-12-14	2.19099
Canis familiaris	PRJEB2311	SAMEA1561437	2012-12-14	2.76497
Canis familiaris	PRJEB2311	SAMEA1561557	2012-12-14	1.86384
Canis familiaris	PRJEB2311	SAMEA1561574	2012-12-14	2.93937
Canis familiaris	PRJEB2311	SAMEA1561598	2012-12-14	2.01282
Canis familiaris	PRJEB2162	SAMEA1521940	2013-01-24	23.3197
Canis familiaris	PRJEB2162	SAMEA1521941	2013-01-24	22.6107
Canis familiaris	PRJEB2311	SAMEA1681454	2013-01-24	2.82157
Canis familiaris	PRJEB2311	SAMEA1681455	2013-01-24	3.90434
Canis familiaris	PRJEB2311	SAMEA1681463	2013-01-24	7.54894
Canis familiaris	PRJEB2311	SAMEA1681464	2013-01-24	8.69671
Canis familiaris	PRJEB2311	SAMEA1681469	2013-01-24	4.02859
Canis familiaris	PRJEB2311	SAMEA1681472	2013-01-24	4.67082
Canis familiaris	PRJNA186960	SAMN01893932	2013-01-25	22.4315
Canis familiaris	PRJNA192935	SAMN01974486	2013-04-15	14.1304
Canis familiaris	PRJNA192935	SAMN01974487	2013-04-15	10.9206
Canis familiaris	PRJNA192935	SAMN01974488	2013-04-15	17.5612
Canis familiaris	PRJNA192935	SAMN01974489	2013-04-15	5.4867
Canis familiaris	PRJNA192935	SAMN01974490	2013-04-15	17.3827
Canis familiaris	PRJNA192935	SAMN01974491	2013-04-15	23.3206
Canis familiaris	PRJNA192935	SAMN01974492	2013-04-15	12.4029
Canis familiaris	PRJNA192935	SAMN01974493	2013-04-15	15.7049
Canis familiaris	PRJNA192935	SAMN01974494	2013-04-15	12.1543
Canis familiaris	PRJNA192935	SAMN01974495	2013-04-15	11.3548
Canis familiaris	PRJNA188158	SAMN01908107	2013-04-30	10.2986
Canis familiaris	PRJEB4544	SAMEA2177732	2013-09-14	10.2986
Canis familiaris	PRJNA208087	SAMN02194722	2013-10-04	28.7235
Canis familiaris	PRJNA208087	SAMN02194723	2013-10-04	31.7431
Canis familiaris	PRJEB2311	SAMEA1561371	2013-10-09	1.28473
Canis familiaris	PRJEB2311	SAMEA1561386	2013-10-09	1.47064
Canis familiaris	PRJEB2311	SAMEA1561505	2013-10-09	1.56365
Canis familiaris	PRJEB2311	SAMEA1561523	2013-10-09	1.13075
Canis familiaris	PRJNA232497	SAMN02485564	2013-12-30	7.76588
Canis familiaris	PRJNA232497	SAMN02485565	2013-12-30	9.63009
Canis familiaris	PRJNA232497	SAMN02485566	2013-12-30	15.3358
Canis familiaris	PRJNA232497	SAMN02485567	2013-12-30	7.29085
Canis familiaris	PRJNA232497	SAMN02485568	2013-12-30	7.85875
Canis familiaris	PRJNA232497	SAMN02485569	2013-12-30	8.47188
Canis familiaris	PRJNA232497	SAMN02485570	2013-12-30	8.30073
Canis familiaris	PRJNA232497	SAMN02485571	2013-12-30	7.88983
Canis familiaris	PRJNA232497	SAMN02485572	2013-12-30	8.42265
Canis familiaris	PRJNA232497	SAMN02485573	2013-12-30	7.11274
Canis familiaris	PRJNA232497	SAMN02485574	2013-12-30	8.08859
Canis familiaris	PRJNA232497	SAMN02485575	2013-12-30	7.66286
Canis familiaris	PRJNA232497	SAMN02485576	2013-12-30	8.38273
Canis familiaris	PRJNA232497	SAMN02485577	2013-12-30	7.68639
Canis familiaris	PRJNA232497	SAMN02485578	2013-12-30	8.08704
Canis familiaris	PRJNA232497	SAMN02485579	2013-12-30	8.43693
Canis familiaris	PRJNA232497	SAMN02485580	2013-12-30	8.14613
Canis familiaris	PRJNA232497	SAMN02485581	2013-12-30	8.08233
Canis familiaris	PRJNA232497	SAMN02485582	2013-12-30	8.4348
Canis familiaris	PRJNA232497	SAMN02485583	2013-12-30	7.31051
Canis familiaris	PRJNA232497	SAMN02485584	2013-12-30	8.02857
Canis familiaris	PRJNA232497	SAMN02485585	2013-12-30	10.1859
Canis familiaris	PRJNA232497	SAMN02485586	2013-12-30	13.7146
Canis familiaris	PRJNA232497	SAMN02485587	2013-12-30	7.55629
Canis familiaris	PRJNA232497	SAMN02485588	2013-12-30	10.7514
Canis familiaris	PRJNA232497	SAMN02485589	2013-12-30	8.77002
Canis familiaris	PRJNA232497	SAMN02485590	2013-12-30	14.1137
Canis familiaris	PRJNA232497	SAMN02485591	2013-12-30	7.94032
Canis familiaris	PRJNA232497	SAMN02485592	2013-12-30	7.11365
Canis familiaris	PRJNA232497	SAMN02485593	2013-12-30	8.38901
Canis familiaris	PRJNA232497	SAMN02485594	2013-12-30	5.95818
Canis familiaris	PRJNA232497	SAMN02485595	2013-12-30	8.62197
Canis familiaris	PRJNA232497	SAMN02485596	2013-12-30	9.09581
Canis familiaris	PRJNA232497	SAMN02485597	2013-12-30	9.45694
Canis familiaris	PRJNA232497	SAMN02485598	2013-12-30	8.14118
Canis familiaris	PRJNA232497	SAMN02485599	2013-12-30	14.2872
Canis familiaris	PRJNA232497	SAMN02485600	2013-12-30	7.25077
Canis familiaris	PRJNA232497	SAMN02485601	2013-12-30	8.29215
Canis familiaris	PRJNA232497	SAMN02485602	2013-12-30	6.23735
Canis familiaris	PRJNA232497	SAMN02485603	2013-12-30	14.9036
Canis familiaris	PRJNA232497	SAMN02485604	2013-12-30	17.4723
Canis familiaris	PRJNA232497	SAMN02485605	2013-12-30	14.7891
Canis familiaris	PRJNA232497	SAMN02485606	2013-12-30	12.9502
Canis familiaris	PRJNA232497	SAMN02485607	2013-12-30	6.46882
Canis familiaris	PRJNA232497	SAMN02485608	2013-12-30	15.6827
Canis familiaris	PRJNA232497	SAMN02485609	2013-12-30	10.0925
Canis familiaris	PRJNA232497	SAMN02485610	2013-12-30	7.81858
Canis familiaris	PRJNA232497	SAMN02485611	2013-12-30	10.4166
Canis familiaris	PRJNA232497	SAMN02485612	2013-12-30	9.48687
Canis familiaris	PRJNA232497	SAMN02485613	2013-12-30	9.36699
Canis familiaris	PRJNA232497	SAMN02485614	2013-12-30	6.28134
Canis familiaris	PRJNA233638	SAMN02570458	2014-03-10	15.6523
Canis familiaris	PRJNA233638	SAMN02585152	2014-03-10	14.5348
Canis familiaris	PRJNA233638	SAMN02585153	2014-03-10	14.8746
Canis familiaris	PRJNA233638	SAMN02585154	2014-03-10	13.5628
Canis familiaris	PRJNA233638	SAMN02585155	2014-03-10	14.5225
Canis familiaris	PRJNA233638	SAMN02585156	2014-03-10	15.0985
Canis familiaris	PRJNA233638	SAMN02585157	2014-03-10	16.1754
Canis familiaris	PRJNA233638	SAMN02585158	2014-03-10	14.3352
Canis familiaris	PRJNA233638	SAMN02585159	2014-03-10	16.2291
Canis familiaris	PRJNA233638	SAMN02585160	2014-03-10	16.2167
Canis familiaris	PRJNA233638	SAMN02585161	2014-03-10	16.2071
Canis familiaris	PRJNA233638	SAMN02585162	2014-03-10	16.8163
Canis familiaris	PRJNA233638	SAMN02585163	2014-03-10	14.7293
Canis familiaris	PRJNA233638	SAMN02585164	2014-03-10	15.3592
Canis familiaris	PRJNA233638	SAMN02585165	2014-03-10	16.0866
Canis familiaris	PRJNA233638	SAMN02585166	2014-03-10	13.4673
Canis familiaris	PRJNA233638	SAMN02585167	2014-03-10	16.5316
Canis familiaris	PRJNA233638	SAMN02585168	2014-03-10	12.9066
Canis familiaris	PRJNA233638	SAMN02585169	2014-03-10	14.5577
Canis familiaris	PRJNA233638	SAMN02585170	2014-03-10	15.9577
Canis familiaris	PRJNA233638	SAMN02585171	2014-03-10	16.2558
Canis familiaris	PRJNA233638	SAMN02585172	2014-03-10	16.2253
Canis familiaris	PRJNA233638	SAMN02585173	2014-03-10	15.4965
Canis familiaris	PRJNA233638	SAMN02585174	2014-03-10	13.9203
Canis familiaris	PRJNA233638	SAMN02585175	2014-03-10	14.8397
Canis familiaris	PRJNA233638	SAMN02585176	2014-03-10	15.336
Canis familiaris	PRJNA233638	SAMN02585177	2014-03-10	13.1202
Canis familiaris	PRJNA233638	SAMN02585178	2014-03-10	15.5844
Canis familiaris	PRJNA233638	SAMN02585179	2014-03-10	15.5786
Canis familiaris	PRJNA233638	SAMN02585180	2014-03-10	14.9569
Canis familiaris	PRJNA233638	SAMN02585181	2014-03-10	16.3635
Canis familiaris	PRJNA233638	SAMN02585182	2014-03-10	14.6146
Canis familiaris	PRJNA233638	SAMN02585183	2014-03-10	14.3037
Canis familiaris	PRJNA233638	SAMN02585184	2014-03-10	14.523
Canis familiaris	PRJNA233638	SAMN02585185	2014-03-10	14.0058
Canis familiaris	PRJNA233638	SAMN02585186	2014-03-10	15.2307
Canis familiaris	PRJNA233638	SAMN02585187	2014-03-10	14.7758
Canis familiaris	PRJNA233638	SAMN02585188	2014-03-10	15.1234
Canis familiaris	PRJNA233638	SAMN02585189	2014-03-10	15.112
Canis familiaris	PRJNA233638	SAMN02585190	2014-03-10	15.7771
Canis familiaris	PRJNA233638	SAMN02585191	2014-03-10	11.7405
Canis familiaris	PRJNA233638	SAMN02585192	2014-03-10	16.8223
Canis familiaris	PRJNA233638	SAMN02585193	2014-03-10	15.9852
Canis familiaris	PRJNA233638	SAMN02585194	2014-03-10	16.4165
Canis familiaris	PRJNA233638	SAMN02585195	2014-03-10	16.2586
Canis familiaris	PRJNA233638	SAMN02585196	2014-03-10	15.8065
Canis familiaris	PRJNA233638	SAMN02585197	2014-03-10	17.6831
Canis familiaris	PRJNA233638	SAMN02585198	2014-03-10	14.0413
Canis familiaris	PRJNA233638	SAMN02585199	2014-03-10	14.3231
Canis familiaris	PRJNA233638	SAMN02585200	2014-03-10	16.8161
Canis familiaris	PRJNA233638	SAMN02585201	2014-03-10	15.2286
Canis familiaris	PRJNA233638	SAMN02585202	2014-03-10	15.9724
Canis familiaris	PRJNA233638	SAMN02585203	2014-03-10	15.6031
Canis familiaris	PRJNA233638	SAMN02585204	2014-03-10	15.5313
Canis familiaris	PRJNA233638	SAMN02585205	2014-03-10	14.9588
Canis familiaris	PRJNA233638	SAMN02585206	2014-03-10	15.8048
Canis familiaris	PRJNA233638	SAMN02585207	2014-03-10	16.4178
Canis familiaris	PRJNA233638	SAMN02585208	2014-03-10	15.1038
Canis familiaris	PRJNA233638	SAMN02585209	2014-03-10	16.5151
Canis familiaris	PRJNA233638	SAMN02585210	2014-03-10	15.5333
Canis familiaris	PRJEB5068	SAMEA2358413	2014-05-14	105.09
Canis familiaris	PRJEB5068	SAMEA2358414	2014-05-14	21.8935
Canis familiaris	PRJEB2162	SAMEA1706021	2014-05-14	0.766526
Canis familiaris	PRJEB2162	SAMEA1706022	2014-05-14	0.800232
Canis familiaris	PRJEB2162	SAMEA1706023	2014-05-14	0.762809
Canis familiaris	PRJEB2162	SAMEA1706024	2014-05-14	0.675933
Canis familiaris	PRJEB2162	SAMEA1706025	2014-05-14	0.726817
Canis familiaris	PRJEB2162	SAMEA1706026	2014-05-14	0.74855
Canis familiaris	PRJEB5068	SAMEA2358415	2014-05-14	71.1552
Canis familiaris	PRJEB5068	SAMEA2358416	2014-05-14	21.1963
Canis familiaris	PRJEB5500	SAMEA2376414	2014-05-14	15.4034
Canis familiaris	PRJEB5875	SAMEA2417016	2014-05-14	27.8468
Canis familiaris	PRJEB6076	SAMEA2446055	2014-05-14	23.7267
Canis familiaris	PRJEB6079	SAMEA2446720	2014-06-09	11.6162
Canis familiaris	PRJEB5874	SAMEA2417015	2014-08-12	40.6209
Canis familiaris	PRJNA203084	SAMN02144217	2014-09-08	19.0191
Canis familiaris	PRJNA247491	SAMN03067872	2014-09-14	17.4697
Canis familiaris	PRJNA247491	SAMN03067873	2014-09-14	79.0821
Canis familiaris	PRJNA247491	SAMN03067874	2014-09-14	84.8958
Canis familiaris	PRJNA247491	SAMN03067875	2014-09-14	60.29
Canis familiaris	PRJNA247491	SAMN03067876	2014-09-14	53.7528
Canis familiaris	PRJNA247491	SAMN03067877	2014-09-14	57.7097
Canis familiaris	PRJNA247491	SAMN03067878	2014-09-14	48.0783
Canis familiaris	PRJNA247491	SAMN03067879	2014-09-14	51.2122
Canis familiaris	PRJNA247491	SAMN03067880	2014-09-14	54.3183
Canis familiaris	PRJNA247491	SAMN03067881	2014-09-14	53.1096
Canis familiaris	PRJNA247491	SAMN03067882	2014-09-14	46.2644
Canis familiaris	PRJNA247491	SAMN03067883	2014-09-14	82.4094
Canis familiaris	PRJNA247491	SAMN03067884	2014-09-14	66.5952
Canis familiaris	PRJNA247491	SAMN03067890	2014-09-14	66.3228
Canis familiaris	PRJNA247491	SAMN03067891	2014-09-14	47.9904
Canis familiaris	PRJNA247491	SAMN03067893	2014-09-14	48.7109
Canis familiaris	PRJNA247491	SAMN03067894	2014-09-14	57.7443
Canis familiaris	PRJNA247491	SAMN03067895	2014-09-14	44.4963
Canis familiaris	PRJNA247491	SAMN03067896	2014-09-14	49.848
Canis familiaris	PRJNA247491	SAMN03068228	2014-09-14	78.4745
Canis familiaris	PRJNA247491	SAMN03068229	2014-09-14	55.1825
Canis familiaris	PRJNA247491	SAMN03068230	2014-09-14	78.1899
Canis familiaris	PRJNA247491	SAMN03068231	2014-09-14	78.9705
Canis familiaris	PRJNA261736	SAMN03075611	2014-10-03	35.8807
Canis familiaris	PRJNA263947	SAMN03145702	2014-11-19	29.0128
Canis familiaris	PRJNA263947	SAMN03145703	2014-11-19	27.7927
Canis familiaris	PRJNA263947	SAMN03145704	2014-11-19	24.7615
Canis familiaris	PRJEB7734	SAMEA3121328	2014-12-02	22.5131
Canis familiaris	PRJEB7735	SAMEA3121337	2014-12-02	12.6309
Canis familiaris	PRJEB7736	SAMEA3121338	2014-12-02	17.0568
Canis familiaris	PRJNA247491	SAMN03275921	2015-01-06	32.9193
Canis familiaris	PRJNA247491	SAMN03275922	2015-01-06	39.4468
Canis familiaris	PRJNA247491	SAMN03275923	2015-01-06	31.5413
Canis familiaris	PRJNA247491	SAMN03275924	2015-01-06	31.3508
Canis familiaris	PRJEB7903	SAMEA3164479	2015-02-03	15.2853
Canis familiaris	PRJNA263947	SAMN03323669	2015-02-27	20.1886
Canis familiaris	PRJNA263947	SAMN03323670	2015-02-27	21.8444
Canis familiaris	PRJNA263947	SAMN03323671	2015-02-27	11.2675
Canis familiaris	PRJNA263947	SAMN03323672	2015-02-27	9.02962
Canis familiaris	PRJNA263947	SAMN03323673	2015-02-27	14.0213
Canis familiaris	PRJNA263947	SAMN03323674	2015-02-27	29.0617
Canis familiaris	PRJNA263947	SAMN03323675	2015-02-27	23.7261
Canis familiaris	PRJNA263947	SAMN03323676	2015-02-27	17.3738
Canis familiaris	PRJNA263947	SAMN03323677	2015-02-27	14.44
Canis familiaris	PRJNA263947	SAMN03323668	2015-02-28	39.6858
Canis familiaris	PRJEB7877	SAMEA3145966	2015-04-15	0.0790309
Canis familiaris	PRJEB7877	SAMEA3145967	2015-04-15	0.137243
Canis familiaris	PRJEB7877	SAMEA3145968	2015-04-15	0.200296
Canis familiaris	PRJEB7877	SAMEA3145969	2015-04-15	0.208706
Canis familiaris	PRJEB7877	SAMEA3145970	2015-04-15	0.245393
Canis familiaris	PRJNA263947	SAMN03580379	2015-05-11	21.9215
Canis familiaris	PRJNA263947	SAMN03580380	2015-05-11	23.3572
Canis familiaris	PRJNA263947	SAMN03580381	2015-05-11	16.931
Canis familiaris	PRJNA263947	SAMN03580382	2015-05-11	19.8525
Canis familiaris	PRJNA263947	SAMN03580383	2015-05-11	26.9798
Canis familiaris	PRJNA263947	SAMN03580384	2015-05-11	32.986
Canis familiaris	PRJNA263947	SAMN03580385	2015-05-11	27.9523
Canis familiaris	PRJNA263947	SAMN03580386	2015-05-11	27.3151
Canis familiaris	PRJNA263947	SAMN03580387	2015-05-11	27.3559
Canis familiaris	PRJNA263947	SAMN03580388	2015-05-11	28.3993
Canis familiaris	PRJNA263947	SAMN03580389	2015-05-11	29.1858
Canis familiaris	PRJNA263947	SAMN03580390	2015-05-11	35.2001
Canis familiaris	PRJNA263947	SAMN03580391	2015-05-11	32.3262
Canis familiaris	PRJNA263947	SAMN03580392	2015-05-11	30.0626
Canis familiaris	PRJNA263947	SAMN03580393	2015-05-11	27.7602
Canis familiaris	PRJNA263947	SAMN03580394	2015-05-11	36.9241
Canis familiaris	PRJNA263947	SAMN03580395	2015-05-11	40.3367
Canis familiaris	PRJNA263947	SAMN03580396	2015-05-11	40.3014
Canis familiaris	PRJNA263947	SAMN03580397	2015-05-11	40.8148
Canis familiaris	PRJNA263947	SAMN03580398	2015-05-11	38.3478
Canis familiaris	PRJNA263947	SAMN03580399	2015-05-11	39.3802
Canis familiaris	PRJNA263947	SAMN03580400	2015-05-11	37.6525
Canis familiaris	PRJNA263947	SAMN03580401	2015-05-11	24.7442
Canis familiaris	PRJNA263947	SAMN03580402	2015-05-11	31.373
Canis familiaris	PRJNA263947	SAMN03580403	2015-05-11	27.3667
Canis familiaris	PRJNA263947	SAMN03580404	2015-05-11	26.3444
Canis familiaris	PRJNA263947	SAMN03580405	2015-05-11	24.6613
Canis familiaris	PRJNA263947	SAMN03580406	2015-05-11	23.1656
Canis familiaris	PRJNA263947	SAMN03580407	2015-05-11	23.5045
Canis familiaris	PRJNA263947	SAMN03580408	2015-05-11	21.9969
Canis familiaris	PRJNA263947	SAMN03580409	2015-05-11	29.602
Canis familiaris	PRJNA263947	SAMN03580410	2015-05-12	18.859
Canis familiaris	PRJNA263947	SAMN03580411	2015-05-12	18.6858
Canis familiaris	PRJNA263947	SAMN03580412	2015-05-12	19.2478
Canis familiaris	PRJNA263947	SAMN03580413	2015-05-12	27.7077
Canis familiaris	PRJEB9437	SAMEA3402917	2015-05-24	15.3741
Canis familiaris	PRJNA253907	SAMN02897983	2015-06-18	5.53368
Canis familiaris	PRJNA253907	SAMN02897984	2015-06-18	1.55139
Canis familiaris	PRJNA253907	SAMN02897986	2015-06-18	1.90538
Canis familiaris	PRJNA253907	SAMN02897987	2015-06-18	1.79336
Canis familiaris	PRJNA253907	SAMN02897988	2015-06-18	6.69879
Canis familiaris	PRJNA255370	SAMN02921305	2015-07-17	30.1805
Canis familiaris	PRJNA176193	SAMN01737209	2015-07-22	62.4477
Canis familiaris	PRJNA255370	SAMN02921304	2015-07-22	20.8342
Canis familiaris	PRJNA255370	SAMN02921306	2015-07-22	11.3966
Canis familiaris	PRJNA255370	SAMN02921307	2015-07-22	12.1609
Canis familiaris	PRJNA255370	SAMN02921308	2015-07-22	22.0536
Canis familiaris	PRJNA255370	SAMN02921309	2015-07-22	13.9855
Canis familiaris	PRJNA203084	SAMN02144216	2015-07-22	23.5366
Canis familiaris	PRJNA203084	SAMN02144219	2015-07-22	23.2154
Canis familiaris	PRJNA288568	SAMN03801643	2015-08-01	7.40208
Canis familiaris	PRJNA288568	SAMN03801644	2015-08-01	51.6524
Canis familiaris	PRJNA288568	SAMN03801645	2015-08-01	24.8598
Canis familiaris	PRJNA288568	SAMN03801646	2015-08-01	55.2158
Canis familiaris	PRJNA288568	SAMN03801647	2015-08-01	45.681
Canis familiaris	PRJNA288568	SAMN03801648	2015-08-01	48.7901
Canis familiaris	PRJNA288568	SAMN03801649	2015-08-01	49.4644
Canis familiaris	PRJNA288568	SAMN03801650	2015-08-01	19.4349
Canis familiaris	PRJNA288568	SAMN03801651	2015-08-01	29.3425
Canis familiaris	PRJNA288568	SAMN03801652	2015-08-01	9.88082
Canis familiaris	PRJNA288568	SAMN03801653	2015-08-01	10.0427
Canis familiaris	PRJNA288568	SAMN03801654	2015-08-01	52.0146
Canis familiaris	PRJNA288568	SAMN03801655	2015-08-01	11.4888
Canis familiaris	PRJNA288568	SAMN03801656	2015-08-01	55.8015
Canis familiaris	PRJNA288568	SAMN03801657	2015-08-01	5.81509
Canis familiaris	PRJNA288568	SAMN03801658	2015-08-01	64.833
Canis familiaris	PRJNA288568	SAMN03801659	2015-08-01	18.707
Canis familiaris	PRJNA288568	SAMN03801660	2015-08-01	52.7319
Canis familiaris	PRJNA288568	SAMN03801662	2015-08-01	31.8849
Canis familiaris	PRJNA288568	SAMN03801663	2015-08-01	5.54185
Canis familiaris	PRJNA288568	SAMN03801664	2015-08-01	73.4963
Canis familiaris	PRJNA288568	SAMN03801665	2015-08-01	21.4862
Canis familiaris	PRJNA288568	SAMN03801666	2015-08-01	69.0217
Canis familiaris	PRJNA288568	SAMN03801667	2015-08-01	51.0089
Canis familiaris	PRJNA288568	SAMN03801668	2015-08-01	44.3377
Canis familiaris	PRJNA288568	SAMN03801669	2015-08-01	61.1891
Canis familiaris	PRJNA288568	SAMN03801670	2015-08-01	20.0152
Canis familiaris	PRJNA288568	SAMN03801671	2015-08-01	17.9749
Canis familiaris	PRJNA288568	SAMN03801672	2015-08-01	49.2958
Canis familiaris	PRJNA288568	SAMN03801673	2015-08-01	28.1776
Canis familiaris	PRJNA288568	SAMN03801674	2015-08-01	30.9163
Canis familiaris	PRJNA288568	SAMN03801675	2015-08-01	39.1623
Canis familiaris	PRJNA288568	SAMN03801676	2015-08-01	62.5688
Canis familiaris	PRJNA288568	SAMN03801677	2015-08-01	10.7229
Canis familiaris	PRJNA288568	SAMN03801678	2015-08-01	7.21042
Canis familiaris	PRJNA288568	SAMN03801679	2015-08-01	6.83798
Canis familiaris	PRJNA288568	SAMN03801680	2015-08-01	13.2898
Canis familiaris	PRJNA288568	SAMN03801681	2015-08-01	10.9086
Canis familiaris	PRJNA288568	SAMN03801682	2015-08-01	16.2149
Canis familiaris	PRJNA288568	SAMN03801683	2015-08-01	21.3797
Canis familiaris	PRJNA288568	SAMN03801684	2015-08-01	44.2339
Canis familiaris	PRJNA288568	SAMN03801685	2015-08-01	46.8687
Canis familiaris	PRJNA288568	SAMN03801686	2015-08-01	66.1735
Canis familiaris	PRJNA288568	SAMN03801687	2015-08-01	22.087
Canis familiaris	PRJNA288568	SAMN03801688	2015-08-01	52.6346
Canis familiaris	PRJNA288568	SAMN03801689	2015-08-01	50.1038
Canis familiaris	PRJNA288568	SAMN03801690	2015-08-01	63.9301
Canis familiaris	PRJNA288568	SAMN03801691	2015-08-01	13.6235
Canis familiaris	PRJNA288568	SAMN03801692	2015-08-01	55.0852
Canis familiaris	PRJNA288568	SAMN03801693	2015-08-01	12.2625
Canis familiaris	PRJNA288568	SAMN03801694	2015-08-01	21.7445
Canis familiaris	PRJNA288568	SAMN03801661	2015-08-01	19.9723
Canis familiaris	PRJEB9590	SAMEA3449656	2015-08-11	15.2743
Canis familiaris	PRJEB9591	SAMEA3449657	2015-08-11	12.6597
Canis familiaris	PRJNA274504	SAMN03366708	2015-08-26	6.2391
Canis familiaris	PRJNA263947	SAMN04196845	2015-10-23	14.051
Canis familiaris	PRJNA263947	SAMN04196846	2015-10-23	25.9398
Canis familiaris	PRJNA263947	SAMN04196847	2015-10-23	7.4499
Canis familiaris	PRJNA263947	SAMN04196848	2015-10-23	11.9432
Canis familiaris	PRJNA263947	SAMN04196849	2015-10-23	25.3719
Canis familiaris	PRJNA263947	SAMN04196850	2015-10-23	23.4997
Canis familiaris	PRJNA263947	SAMN04196851	2015-10-23	22.6535
Canis familiaris	PRJNA263947	SAMN04196852	2015-10-23	26.5315
Canis familiaris	PRJNA263947	SAMN04196853	2015-10-23	27.0554
Canis familiaris	PRJNA263947	SAMN04196854	2015-10-23	30.0004
Canis familiaris	PRJNA263947	SAMN04196855	2015-10-23	32.9908
Canis familiaris	PRJNA263947	SAMN04196856	2015-10-23	30.1114
Canis familiaris	PRJNA263947	SAMN04196857	2015-10-23	30.9516
Canis familiaris	PRJNA263947	SAMN04196858	2015-10-23	25.2598
Canis familiaris	PRJNA263947	SAMN04196859	2015-10-23	32.5433
Canis familiaris	PRJNA263947	SAMN04196860	2015-10-23	32.3464
Canis familiaris	PRJNA263947	SAMN04196861	2015-10-23	25.0723
Canis familiaris	PRJNA263947	SAMN04196862	2015-10-23	23.0972
Canis familiaris	PRJNA263947	SAMN04196863	2015-10-23	28.4795
Canis familiaris	PRJNA263947	SAMN04196864	2015-10-23	29.4141
Canis familiaris	PRJNA263947	SAMN04196865	2015-10-23	28.0094
Canis familiaris	PRJEB10823	SAMEA3539249	2015-11-11	17.7366
Canis familiaris	PRJNA266585	SAMN03168374	2015-12-01	17.2497
Canis familiaris	PRJNA266585	SAMN03168352	2015-12-01	17.5416
Canis familiaris	PRJNA266585	SAMN03168353	2015-12-01	19.696
Canis familiaris	PRJNA266585	SAMN03168354	2015-12-01	18.0789
Canis familiaris	PRJNA266585	SAMN03168355	2015-12-01	18.0646
Canis familiaris	PRJNA266585	SAMN03168356	2015-12-01	18.7916
Canis familiaris	PRJNA266585	SAMN03168357	2015-12-01	18.8825
Canis familiaris	PRJNA266585	SAMN03168358	2015-12-01	17.4325
Canis familiaris	PRJNA266585	SAMN03168359	2015-12-01	19.2146
Canis familiaris	PRJNA266585	SAMN03168360	2015-12-01	12.9159
Canis familiaris	PRJNA266585	SAMN03168361	2015-12-01	17.2069
Canis familiaris	PRJNA266585	SAMN03168363	2015-12-01	18.6598
Canis familiaris	PRJNA266585	SAMN03168364	2015-12-01	17.351
Canis familiaris	PRJNA266585	SAMN03168365	2015-12-01	16.0224
Canis familiaris	PRJNA266585	SAMN03168366	2015-12-01	18.3043
Canis familiaris	PRJNA266585	SAMN03168367	2015-12-01	11.2748
Canis familiaris	PRJNA266585	SAMN03168368	2015-12-01	17.8306
Canis familiaris	PRJNA266585	SAMN03168369	2015-12-01	18.6223
Canis familiaris	PRJNA266585	SAMN03168370	2015-12-01	16.6449
Canis familiaris	PRJNA266585	SAMN03168371	2015-12-01	19.4672
Canis familiaris	PRJNA266585	SAMN03168372	2015-12-01	18.9727
Canis familiaris	PRJNA266585	SAMN03168373	2015-12-01	17.2527
Canis familiaris	PRJNA266585	SAMN03168375	2015-12-01	16.0847
Canis familiaris	PRJNA266585	SAMN03168376	2015-12-01	17.6427
Canis familiaris	PRJNA266585	SAMN03168377	2015-12-01	17.2119
Canis familiaris	PRJNA266585	SAMN03168378	2015-12-01	15.8399
Canis familiaris	PRJNA266585	SAMN03168379	2015-12-01	18.0202
Canis familiaris	PRJNA266585	SAMN03168380	2015-12-01	17.3699
Canis familiaris	PRJNA266585	SAMN03168381	2015-12-01	16.8528
Canis familiaris	PRJNA266585	SAMN03168382	2015-12-01	18.8006
Canis familiaris	PRJNA266585	SAMN03168383	2015-12-01	36.8369
Canis familiaris	PRJNA266585	SAMN03168384	2015-12-01	16.1091
Canis familiaris	PRJNA266585	SAMN03168385	2015-12-01	15.9782
Canis familiaris	PRJNA266585	SAMN03168386	2015-12-01	17.3317
Canis familiaris	PRJNA266585	SAMN03168387	2015-12-01	17.2045
Canis familiaris	PRJNA266585	SAMN03168388	2015-12-01	16.8265
Canis familiaris	PRJNA266585	SAMN03168389	2015-12-01	17.2793
Canis familiaris	PRJNA266585	SAMN03168390	2015-12-01	17.0012
Canis familiaris	PRJNA266585	SAMN03168391	2015-12-01	17.2688
Canis familiaris	PRJNA266585	SAMN03168392	2015-12-01	19.274
Canis familiaris	PRJEB11835	SAMEA3723573	2016-01-13	28.3771
Canis familiaris	PRJEB12337	SAMEA3724571	2016-03-02	29.1996
Canis familiaris	PRJEB12339	SAMEA3724570	2016-03-02	30.9832
Canis familiaris	PRJEB13139	SAMEA3905753	2016-04-09	30.9732
Canis familiaris	PRJNA232497	SAMN04851101	2016-04-16	14.8986
Canis familiaris	PRJNA232497	SAMN04851103	2016-04-16	5.50145
Canis familiaris	PRJNA232497	SAMN04851104	2016-04-16	8.2879
Canis familiaris	PRJNA318403	SAMN04851098	2016-04-16	20.2498
Canis familiaris	PRJNA318403	SAMN04852950	2016-04-23	8.72471
Canis familiaris	PRJNA318403	SAMN04852951	2016-04-23	7.18325
Canis familiaris	PRJNA318403	SAMN04852952	2016-04-23	7.81809
Canis familiaris	PRJNA318403	SAMN04852953	2016-04-23	8.67156
Canis familiaris	PRJNA318403	SAMN04852954	2016-04-23	6.4489
Canis familiaris	PRJNA318403	SAMN04852955	2016-04-23	8.21151
Canis familiaris	PRJNA318403	SAMN04852956	2016-04-23	14.4013
Canis familiaris	PRJNA318403	SAMN04852957	2016-04-23	13.1005
Canis familiaris	PRJNA318403	SAMN04852958	2016-04-23	7.01554
Canis familiaris	PRJNA318403	SAMN04852959	2016-04-23	8.11878
Canis familiaris	PRJNA318403	SAMN04852960	2016-04-23	13.673
Canis familiaris	PRJNA318403	SAMN04852961	2016-04-23	12.8579
Canis familiaris	PRJNA319610	SAMN04908310	2016-06-01	26.2646
Canis familiaris	PRJNA319610	SAMN04908307	2016-06-01	25.224
Canis familiaris	PRJNA319610	SAMN04908308	2016-06-01	24.1578
Canis familiaris	PRJNA319610	SAMN04908309	2016-06-01	25.9726
Canis familiaris	PRJNA319610	SAMN04908311	2016-06-01	24.7831
Canis familiaris	PRJEB13468	SAMEA3928139	2016-06-13	18.4069
Canis familiaris	PRJEB13468	SAMEA3928140	2016-06-13	17.7011
Canis familiaris	PRJEB13468	SAMEA3928141	2016-06-13	18.9914
Canis familiaris	PRJEB13468	SAMEA3928142	2016-06-13	7.23295
Canis familiaris	PRJEB13468	SAMEA3928143	2016-06-13	20.5612
Canis familiaris	PRJEB13468	SAMEA3928144	2016-06-13	21.2128
Canis familiaris	PRJEB13468	SAMEA3928145	2016-06-13	19.5191
Canis familiaris	PRJEB13468	SAMEA3928146	2016-06-13	9.02025
Canis familiaris	PRJEB13723	SAMEA3940300	2016-06-28	17.456
Canis familiaris	PRJEB14110	SAMEA3994036	2016-07-14	13.1653
Canis familiaris	PRJEB14110	SAMEA3994037	2016-07-14	27.5843
Canis familiaris	PRJEB14110	SAMEA3994038	2016-07-14	26.9529
Canis familiaris	PRJEB14490	SAMEA4040708	2016-07-18	4.06011
Canis familiaris	PRJEB14490	SAMEA4040709	2016-07-18	3.90035
Canis familiaris	PRJEB14490	SAMEA4040710	2016-07-18	3.75093
Canis familiaris	PRJEB14490	SAMEA4040711	2016-07-18	3.895
Canis familiaris	PRJEB14840	SAMEA4346711	2016-09-29	36.6798
Canis familiaris	PRJNA338327	SAMN05553146	2016-10-01	0.0190962
Canis familiaris	PRJNA338327	SAMN05553147	2016-10-01	0.0200337
Canis familiaris	PRJNA338327	SAMN05553148	2016-10-01	0.0175729
Canis familiaris	PRJNA299099	SAMN04195504	2016-10-12	14.7355
Canis familiaris	PRJNA299099	SAMN04195505	2016-10-12	29.8287
Canis familiaris	PRJNA299099	SAMN04195506	2016-10-12	30.9408
Canis familiaris	PRJNA299099	SAMN04195507	2016-10-12	28.5464
Canis familiaris	PRJNA299099	SAMN04195508	2016-10-12	29.5258
Canis familiaris	PRJNA299099	SAMN04195509	2016-10-12	31.6879
Canis familiaris	PRJNA299099	SAMN04195510	2016-10-12	30.6125
Canis familiaris	PRJEB16012	SAMEA4506890	2016-10-27	16.058
Canis familiaris	PRJEB16012	SAMEA4504820	2016-10-27	18.738
Canis familiaris	PRJEB16012	SAMEA4504821	2016-10-27	22.0253
Canis familiaris	PRJEB16012	SAMEA4504822	2016-10-27	16.0904
Canis familiaris	PRJEB16012	SAMEA4504823	2016-10-27	15.6594
Canis familiaris	PRJEB16012	SAMEA4504824	2016-10-27	16.069
Canis familiaris	PRJEB16012	SAMEA4504825	2016-10-27	14.5097
Canis familiaris	PRJEB16012	SAMEA4504826	2016-10-27	14.6355
Canis familiaris	PRJEB16012	SAMEA4504827	2016-10-27	14.7952
Canis familiaris	PRJEB16012	SAMEA4504828	2016-10-27	12.8781
Canis familiaris	PRJEB16012	SAMEA4504829	2016-10-27	11.8309
Canis familiaris	PRJEB16012	SAMEA4504830	2016-10-27	11.5089
Canis familiaris	PRJEB16012	SAMEA4504831	2016-10-27	15.4554
Canis familiaris	PRJEB16012	SAMEA4504832	2016-10-27	11.8507
Canis familiaris	PRJEB16012	SAMEA4504833	2016-10-27	13.8691
Canis familiaris	PRJEB16012	SAMEA4504834	2016-10-27	13.8514
Canis familiaris	PRJEB16012	SAMEA4504835	2016-10-27	14.1231
Canis familiaris	PRJEB16012	SAMEA4504837	2016-10-27	24.8562
Canis familiaris	PRJEB16012	SAMEA4504838	2016-10-27	27.4023
Canis familiaris	PRJEB16012	SAMEA4504839	2016-10-27	27.5524
Canis familiaris	PRJEB16012	SAMEA4504840	2016-10-27	29.6176
Canis familiaris	PRJEB16012	SAMEA4505489	2016-10-27	80.8633
Canis familiaris	PRJEB16012	SAMEA4505490	2016-10-27	4.14691
Canis familiaris	PRJEB16012	SAMEA4505491	2016-10-27	20.0111
Canis familiaris	PRJEB16012	SAMEA4505492	2016-10-27	19.5903
Canis familiaris	PRJEB16012	SAMEA4505493	2016-10-27	16.459
Canis familiaris	PRJEB16012	SAMEA4505494	2016-10-27	14.9007
Canis familiaris	PRJEB16012	SAMEA4505495	2016-10-27	9.57889
Canis familiaris	PRJEB16012	SAMEA4505496	2016-10-27	10.149
Canis familiaris	PRJEB16012	SAMEA4505497	2016-10-27	12.6114
Canis familiaris	PRJEB16012	SAMEA4505498	2016-10-27	11.3871
Canis familiaris	PRJEB16012	SAMEA4505499	2016-10-27	13.2325
Canis familiaris	PRJEB16012	SAMEA4505500	2016-10-27	12.5804
Canis familiaris	PRJEB16012	SAMEA4505501	2016-10-27	16.0155
Canis familiaris	PRJEB16012	SAMEA4506885	2016-10-27	10.5108
Canis familiaris	PRJEB16012	SAMEA4506886	2016-10-27	12.0498
Canis familiaris	PRJEB16012	SAMEA4506887	2016-10-27	15.3506
Canis familiaris	PRJEB16012	SAMEA4506888	2016-10-27	25.6037
Canis familiaris	PRJEB16012	SAMEA4506889	2016-10-27	13.4507
Canis familiaris	PRJEB16012	SAMEA4506891	2016-10-27	19.1207
Canis familiaris	PRJEB16012	SAMEA4506892	2016-10-27	23.3548
Canis familiaris	PRJEB16012	SAMEA4506893	2016-10-27	26.9106
Canis familiaris	PRJEB16012	SAMEA4506894	2016-10-27	14.2056
Canis familiaris	PRJEB16012	SAMEA4506895	2016-10-27	30.4492
Canis familiaris	PRJEB16012	SAMEA4506896	2016-10-27	25.6066
Canis familiaris	PRJEB16012	SAMEA4506897	2016-10-27	39.3843
Canis familiaris	PRJEB16012	SAMEA4506898	2016-10-27	21.7123
Canis familiaris	PRJEB16012	SAMEA4506899	2016-10-27	27.4086
Canis familiaris	PRJEB16012	SAMEA4506900	2016-10-27	27.7523
Canis familiaris	PRJEB16012	SAMEA4506901	2016-10-27	22.8157
Canis familiaris	PRJEB16012	SAMEA4506902	2016-10-27	24.0221
Canis familiaris	PRJEB16012	SAMEA4509487	2016-10-27	27.9306
Canis familiaris	PRJEB16012	SAMEA4509488	2016-10-27	24.5898
Canis familiaris	PRJEB16012	SAMEA4509489	2016-10-27	19.8826
Canis familiaris	PRJEB16012	SAMEA4509490	2016-10-27	21.4141
Canis familiaris	PRJEB16012	SAMEA4509491	2016-10-27	20.7574
Canis familiaris	PRJEB16012	SAMEA4509492	2016-10-27	17.8468
Canis familiaris	PRJNA263947	SAMN06159680	2016-12-17	9.78807
Canis familiaris	PRJNA263947	SAMN05770194	2016-12-17	36.4258
Canis familiaris	PRJNA263947	SAMN06159667	2016-12-17	27.0887
Canis familiaris	PRJNA263947	SAMN06159668	2016-12-17	41.0039
Canis familiaris	PRJNA263947	SAMN06159669	2016-12-17	39.9288
Canis familiaris	PRJNA263947	SAMN06159670	2016-12-17	43.541
Canis familiaris	PRJNA263947	SAMN06159671	2016-12-17	39.8403
Canis familiaris	PRJNA263947	SAMN06159672	2016-12-17	32.8429
Canis familiaris	PRJNA263947	SAMN06159673	2016-12-17	42.3831
Canis familiaris	PRJNA263947	SAMN06159674	2016-12-17	34.0382
Canis familiaris	PRJNA263947	SAMN06159675	2016-12-17	43.6108
Canis familiaris	PRJNA263947	SAMN06159676	2016-12-17	35.1512
Canis familiaris	PRJNA263947	SAMN06159677	2016-12-17	47.5034
Canis familiaris	PRJNA263947	SAMN06159678	2016-12-17	55.7544
Canis familiaris	PRJNA263947	SAMN06159679	2016-12-17	37.497
Canis familiaris	PRJNA263947	SAMN06159681	2016-12-17	37.4235
Canis familiaris	PRJNA263947	SAMN06159682	2016-12-17	38.2936
Canis familiaris	PRJNA263947	SAMN06159683	2016-12-17	39.8892
Canis familiaris	PRJNA263947	SAMN06159684	2016-12-17	41.5126
Canis familiaris	PRJNA263947	SAMN06159685	2016-12-17	36.2606
Canis familiaris	PRJNA263947	SAMN06159686	2016-12-17	42.4871
Canis familiaris	PRJNA263947	SAMN06159687	2016-12-17	37.4172
Canis familiaris	PRJNA263947	SAMN06159688	2016-12-17	37.5107
Canis familiaris	PRJNA263947	SAMN06159689	2016-12-17	37.7976
Canis familiaris	PRJNA357866	SAMN06161404	2017-01-10	23.9127
Canis familiaris	PRJEB16012	SAMEA47266168	2017-01-12	13.0014
Canis familiaris	PRJNA309755	SAMN04440505	2017-01-27	13.6907
Canis familiaris	PRJNA309755	SAMN04440506	2017-01-27	12.6052
Canis familiaris	PRJEB16012	SAMEA72802168	2017-02-03	21.825
Canis familiaris	PRJEB16012	SAMEA72802918	2017-02-03	21.4901
Canis familiaris	PRJNA360671	SAMN06214558	2017-02-10	15.1621
Canis familiaris	PRJEB16012	SAMEA103135918	2017-03-03	25.3031
Canis familiaris	PRJNA232497	SAMN06608432	2017-03-18	9.33394
Canis familiaris	PRJNA232497	SAMN06608434	2017-03-18	11.9207
Canis familiaris	PRJNA232497	SAMN06608444	2017-03-18	8.75277
Canis familiaris	PRJNA380744	SAMN06647475	2017-03-28	12.8027
Canis familiaris	PRJEB16012	SAMEA103935360	2017-03-31	16.5788
Canis familiaris	PRJEB16012	SAMEA103949042	2017-03-31	13.424
Canis familiaris	PRJEB16012	SAMEA104016307	2017-04-25	22.8974
Canis familiaris	PRJEB16012	SAMEA104032048	2017-04-28	31.511
Canis familiaris	PRJEB16012	SAMEA104091550	2017-05-24	15.3277
Canis familiaris	PRJEB16012	SAMEA104091551	2017-05-24	14.5395
Canis familiaris	PRJEB16012	SAMEA104091552	2017-05-24	13.3585
Canis familiaris	PRJEB16012	SAMEA104091553	2017-05-24	14.7282
Canis familiaris	PRJEB16012	SAMEA104091554	2017-05-24	27.1215
Canis familiaris	PRJEB16012	SAMEA104091555	2017-05-24	29.0518
Canis familiaris	PRJEB16012	SAMEA104091556	2017-05-24	22.5986
Canis familiaris	PRJEB16012	SAMEA104091557	2017-05-24	34.5531
Canis familiaris	PRJEB16012	SAMEA104091558	2017-05-24	31.039
Canis familiaris	PRJEB16012	SAMEA104091559	2017-05-24	27.9731
Canis familiaris	PRJEB16012	SAMEA104091560	2017-05-24	25.5591
Canis familiaris	PRJEB16012	SAMEA104091561	2017-05-24	39.5217
Canis familiaris	PRJEB16012	SAMEA104091562	2017-05-24	40.1699
Canis familiaris	PRJEB16012	SAMEA104091563	2017-05-24	27.3939
Canis familiaris	PRJEB16012	SAMEA104091564	2017-05-24	22.4787
Canis familiaris	PRJEB16012	SAMEA104091565	2017-05-24	26.2727
Canis familiaris	PRJEB16012	SAMEA104091566	2017-05-24	22.5199
Canis familiaris	PRJEB16012	SAMEA104091567	2017-05-24	25.5028
Canis familiaris	PRJEB16012	SAMEA104091568	2017-05-24	17.9177
Canis familiaris	PRJEB16012	SAMEA104091569	2017-05-24	31.056
Canis familiaris	PRJEB16012	SAMEA104091570	2017-05-24	29.2447
Canis familiaris	PRJEB16012	SAMEA104091571	2017-05-24	16.9491
Canis familiaris	PRJEB16012	SAMEA104091572	2017-05-24	31.1603
Canis familiaris	PRJEB16012	SAMEA104091573	2017-05-24	38.0955
Canis familiaris	PRJNA323686	SAMN05185373	2017-05-30	14.9033
Canis familiaris	PRJNA323686	SAMN05185377	2017-05-30	15.3271
Canis familiaris	PRJNA323686	SAMN05185379	2017-05-30	14.7104
Canis familiaris	PRJNA323686	SAMN05185380	2017-05-30	15.5485
Canis familiaris	PRJNA323686	SAMN05185382	2017-05-30	12.0883
Canis familiaris	PRJNA323686	SAMN05185384	2017-05-30	14.3744
Canis familiaris	PRJNA323686	SAMN05185385	2017-05-30	12.3196
Canis familiaris	PRJNA323686	SAMN05185393	2017-05-30	9.21303
Canis familiaris	PRJNA323686	SAMN05185394	2017-05-30	8.99875
Canis familiaris	PRJNA323686	SAMN05185396	2017-05-30	13.3744
Canis familiaris	PRJNA323686	SAMN05185397	2017-05-30	15.3649
Canis familiaris	PRJNA323686	SAMN05185399	2017-05-30	15.0067
Canis familiaris	PRJNA323686	SAMN05185400	2017-05-30	16.0454
Canis familiaris	PRJNA323686	SAMN05185401	2017-05-30	15.0547
Canis familiaris	PRJNA323686	SAMN05185404	2017-05-30	12.2299
Canis familiaris	PRJEB16012	SAMEA104105252	2017-05-31	31.5124
Canis familiaris	PRJEB16012	SAMEA104125075	2017-06-19	36.0552
Canis familiaris	PRJEB16012	SAMEA104125112	2017-06-19	26.6122
Canis familiaris	PRJEB16012	SAMEA104125113	2017-06-19	27.5085
Canis familiaris	PRJEB16012	SAMEA104125114	2017-06-19	0.337215
Canis familiaris	PRJEB16012	SAMEA104125115	2017-06-19	24.0667
Canis familiaris	PRJEB16012	SAMEA104125116	2017-06-19	23.6961
Canis familiaris	PRJEB16012	SAMEA104125117	2017-06-19	19.4044
Canis familiaris	PRJEB16012	SAMEA104125118	2017-06-19	39.139
Canis familiaris	PRJEB16012	SAMEA104125119	2017-06-19	32.7076
Canis familiaris	PRJEB16012	SAMEA104125120	2017-06-19	39.1493
Canis familiaris	PRJEB16012	SAMEA104125121	2017-06-19	34.695
Canis familiaris	PRJNA356874	SAMN06128270	2017-07-01	13.9664
Canis familiaris	PRJNA356874	SAMN06128271	2017-07-01	17.6566
Canis familiaris	PRJNA356874	SAMN06128272	2017-07-01	14.697
Canis familiaris	PRJNA356874	SAMN06128273	2017-07-01	13.4752
Canis familiaris	PRJNA327712	SAMN05356426	2017-07-04	10.3733
Canis familiaris	PRJNA327712	SAMN05356427	2017-07-04	11.2484
Canis familiaris	PRJNA384913	SAMN06853972	2017-07-18	8.18035
Canis familiaris	PRJNA384913	SAMN06853973	2017-07-18	6.60867
Canis familiaris	PRJNA384913	SAMN06853974	2017-07-18	7.24342
Canis familiaris	PRJNA384913	SAMN06853975	2017-07-18	7.70649
Canis familiaris	PRJNA384913	SAMN06853971	2017-07-19	6.6042
Canis familiaris	PRJNA384927	SAMN06893646	2017-07-31	1.76704e-05
Canis familiaris	PRJNA384927	SAMN06893642	2017-07-31	1.124e-05
Canis familiaris	PRJNA384927	SAMN06893643	2017-07-31	1.296e-05
Canis familiaris	PRJNA384927	SAMN06893644	2017-07-31	8.32e-06
Canis familiaris	PRJNA384927	SAMN06893645	2017-07-31	1.51604e-05
Canis familiaris	PRJNA384927	SAMN06893647	2017-07-31	1.6566e-05
Canis familiaris	PRJNA394814	SAMN07360925	2017-08-16	22.4228
Canis familiaris	PRJNA394814	SAMN07360926	2017-08-16	19.7464
Canis familiaris	PRJNA392958	SAMN07313075	2017-08-31	19.0546
Canis familiaris	PRJEB16012	SAMEA104283460	2017-09-07	52.2143
Canis familiaris	PRJEB16012	SAMEA104283461	2017-09-07	18.8921
Canis familiaris	PRJEB16012	SAMEA104283462	2017-09-07	22.1297
Canis familiaris	PRJEB16012	SAMEA104283463	2017-09-07	20.0103
Canis familiaris	PRJEB16012	SAMEA104283464	2017-09-07	39.4126
Canis familiaris	PRJEB16012	SAMEA104283465	2017-09-07	39.1222
Canis familiaris	PRJEB16012	SAMEA104283466	2017-09-07	30.0251
Canis familiaris	PRJEB16012	SAMEA104283468	2017-09-07	25.4906
Canis familiaris	PRJEB16012	SAMEA104283469	2017-09-07	26.5393
Canis familiaris	PRJEB16012	SAMEA104283470	2017-09-07	26.456
Canis familiaris	PRJEB16012	SAMEA104283471	2017-09-07	24.5839
Canis familiaris	PRJEB16012	SAMEA104283473	2017-09-07	20.2608
Canis familiaris	PRJNA338147	SAMN05468142	2017-09-30	49.5345
Canis familiaris	PRJNA338147	SAMN05468143	2017-09-30	36.6926
Canis familiaris	PRJNA338147	SAMN06244664	2017-09-30	24.2284
Canis familiaris	PRJNA338147	SAMN06244665	2017-09-30	23.6815
Canis familiaris	PRJNA338147	SAMN06244666	2017-09-30	21.4719
Canis familiaris	PRJNA338147	SAMN06244667	2017-09-30	24.7688
Canis familiaris	PRJNA338147	SAMN06244668	2017-09-30	17.4368
Canis familiaris	PRJNA344694	SAMN05831101	2017-10-31	7.71452
Canis familiaris	PRJNA344694	SAMN05831102	2017-10-31	6.76038
Canis familiaris	PRJNA344694	SAMN05831103	2017-10-31	6.73933
Canis familiaris	PRJNA344694	SAMN05831104	2017-10-31	7.96393
Canis familiaris	PRJNA418755	SAMN08032746	2017-11-16	49.6079
Canis familiaris	PRJEB17926	SAMEA104379879	2017-11-16	28.635
Canis familiaris	PRJEB17926	SAMEA104379880	2017-11-16	32.808
Canis familiaris	PRJEB17926	SAMEA104379881	2017-11-16	32.1206
Canis familiaris	PRJEB17926	SAMEA104379882	2017-11-16	30.9784
Canis familiaris	PRJEB17926	SAMEA104379883	2017-11-16	31.2366
Canis familiaris	PRJEB17926	SAMEA104379884	2017-11-16	28.4119
Canis familiaris	PRJEB17926	SAMEA104379885	2017-11-16	31.3572
Canis familiaris	PRJEB17926	SAMEA104388841	2017-11-16	30.3007
Canis familiaris	PRJEB17926	SAMEA104388842	2017-11-16	52.6681
Canis familiaris	PRJEB17926	SAMEA104388843	2017-11-16	55.9649
Canis familiaris	PRJEB17926	SAMEA104388844	2017-11-16	58.2233
Canis familiaris	PRJEB17926	SAMEA104388845	2017-11-16	58.017
Canis familiaris	PRJEB17926	SAMEA104388846	2017-11-16	57.2281
Canis familiaris	PRJEB17926	SAMEA104388847	2017-11-16	59.6193
Canis familiaris	PRJEB17926	SAMEA104388848	2017-11-16	56.7393
Canis familiaris	PRJEB17926	SAMEA104388849	2017-11-16	59.0802
Canis familiaris	PRJEB17926	SAMEA104388850	2017-11-16	58.9118
Canis familiaris	PRJEB17926	SAMEA104388851	2017-11-16	56.1822
Canis familiaris	PRJEB17926	SAMEA104389201	2017-11-16	53.8345
Canis familiaris	PRJEB17926	SAMEA104389202	2017-11-16	57.2705
Canis familiaris	PRJEB17926	SAMEA104389203	2017-11-16	57.3441
Canis familiaris	PRJEB17926	SAMEA104389204	2017-11-16	60.4555
Canis familiaris	PRJEB17926	SAMEA104389205	2017-11-16	57.9092
Canis familiaris	PRJEB17926	SAMEA104389206	2017-11-16	60.0958
Canis familiaris	PRJEB17926	SAMEA104389207	2017-11-16	57.7056
Canis familiaris	PRJEB17926	SAMEA104389208	2017-11-16	57.6519
Canis familiaris	PRJEB17926	SAMEA104389209	2017-11-16	57.4623
Canis familiaris	PRJEB17926	SAMEA104389210	2017-11-16	59.0735
Canis familiaris	PRJEB17926	SAMEA104389211	2017-11-16	61.7729
Canis familiaris	PRJEB17926	SAMEA104389212	2017-11-16	58.1429
Canis familiaris	PRJEB17926	SAMEA104389213	2017-11-16	57.3129
Canis familiaris	PRJNA418842	SAMN08035664	2017-11-22	2.43487
Canis familiaris	PRJNA418842	SAMN08035666	2017-11-22	3.14304
Canis familiaris	PRJNA418842	SAMN08035651	2017-11-23	6.57933
Canis familiaris	PRJNA418842	SAMN08035652	2017-11-23	5.85153
Canis familiaris	PRJNA418842	SAMN08035653	2017-11-23	4.32041
Canis familiaris	PRJNA418842	SAMN08035654	2017-11-23	5.48576
Canis familiaris	PRJNA418842	SAMN08035655	2017-11-23	5.42244
Canis familiaris	PRJNA418842	SAMN08035656	2017-11-23	5.97929
Canis familiaris	PRJNA418842	SAMN08035657	2017-11-23	8.97376
Canis familiaris	PRJNA418842	SAMN08035658	2017-11-23	8.37169
Canis familiaris	PRJNA418842	SAMN08035659	2017-11-23	15.217
Canis familiaris	PRJNA418842	SAMN08035660	2017-11-23	14.1609
Canis familiaris	PRJNA418842	SAMN08035661	2017-11-23	2.83042
Canis familiaris	PRJNA418842	SAMN08035662	2017-11-23	2.71245
Canis familiaris	PRJNA418842	SAMN08035663	2017-11-23	2.67249
Canis familiaris	PRJNA418842	SAMN08035665	2017-11-23	3.48395
Canis familiaris	PRJNA418842	SAMN08035667	2017-11-23	3.14326
Canis familiaris	PRJEB17926	SAMEA104389243	2017-11-28	59.1177
Canis familiaris	PRJEB17926	SAMEA104389237	2017-11-28	53.3074
Canis familiaris	PRJEB17926	SAMEA104389238	2017-11-28	52.4901
Canis familiaris	PRJEB17926	SAMEA104389239	2017-11-28	53.8924
Canis familiaris	PRJEB17926	SAMEA104389241	2017-11-28	55.3339
Canis familiaris	PRJEB17926	SAMEA104389242	2017-11-28	53.0096
Canis familiaris	PRJEB20845	SAMEA104140397	2017-11-30	8.512
Canis familiaris	PRJEB20845	SAMEA104140398	2017-11-30	11.4297
Canis familiaris	PRJNA422430	SAMN08177877	2017-12-15	64.5997
Canis familiaris	PRJNA358192	SAMN06167373	2018-01-01	17.2057
Canis familiaris	PRJNA358192	SAMN06167374	2018-01-01	15.5454
Canis familiaris	PRJNA358192	SAMN06167375	2018-01-01	16.469
Canis familiaris	PRJNA358192	SAMN06167376	2018-01-01	16.8647
Canis familiaris	PRJNA358192	SAMN06167377	2018-01-01	17.3845
Canis familiaris	PRJNA358192	SAMN06167378	2018-01-01	15.2355
Canis familiaris	PRJNA358192	SAMN06167379	2018-01-01	18.18
Canis familiaris	PRJNA358192	SAMN06167380	2018-01-01	17.3717
Canis familiaris	PRJNA358192	SAMN06167381	2018-01-01	17.166
Canis familiaris	PRJNA358192	SAMN06167382	2018-01-01	17.6282
Canis familiaris	PRJNA358192	SAMN06167383	2018-01-01	13.7355
Canis familiaris	PRJNA358192	SAMN06167384	2018-01-01	17.2398
Canis familiaris	PRJNA358192	SAMN06167385	2018-01-01	16.4303
Canis familiaris	PRJNA358192	SAMN06167386	2018-01-01	16.9826
Canis familiaris	PRJNA358192	SAMN06167387	2018-01-01	14.939
Canis familiaris	PRJNA358192	SAMN06167388	2018-01-01	15.4143
Canis familiaris	PRJNA358192	SAMN06167389	2018-01-01	16.3325
Canis familiaris	PRJNA358192	SAMN06167390	2018-01-01	13.9614
Canis familiaris	PRJNA358192	SAMN06167391	2018-01-01	13.4654
Canis familiaris	PRJNA358192	SAMN06167392	2018-01-01	13.0289
Canis familiaris	PRJNA358192	SAMN06167393	2018-01-01	16.1997
Canis familiaris	PRJNA358192	SAMN06167394	2018-01-01	16.8024
Canis familiaris	PRJEB16012	SAMEA104500411	2018-01-26	22.0785
Canis familiaris	PRJEB16012	SAMEA104500412	2018-01-26	22.7555
Canis familiaris	PRJEB16012	SAMEA104500413	2018-01-26	23.5448
Canis familiaris	PRJEB16012	SAMEA104656180	2018-03-03	11.9642
Canis familiaris	PRJEB16012	SAMEA104656181	2018-03-03	25.5693
Canis familiaris	PRJEB16012	SAMEA104656182	2018-03-03	29.3321
Canis familiaris	PRJEB16012	SAMEA104656183	2018-03-03	27.0133
Canis familiaris	PRJEB16012	SAMEA104658568	2018-03-03	13.4477
Canis familiaris	PRJEB16012	SAMEA104658569	2018-03-03	26.2792
Canis familiaris	PRJEB16012	SAMEA104658570	2018-03-03	22.192
Canis familiaris	PRJEB16012	SAMEA1066474	2018-04-08	29.4576
Canis familiaris	PRJEB16012	SAMEA1066475	2018-04-08	33.4802
Canis familiaris	PRJEB16012	SAMEA1066476	2018-04-08	24.5445
Canis familiaris	PRJNA448733	SAMN08872810	2018-05-10	44.4886
Canis familiaris	PRJNA448733	SAMN08872813	2018-05-10	49.6491
Canis familiaris	PRJNA448733	SAMN08872843	2018-05-10	14.6836
Canis familiaris	PRJNA448733	SAMN08872844	2018-05-10	19.2086
Canis familiaris	PRJNA448733	SAMN08872845	2018-05-10	14.0229
Canis familiaris	PRJNA448733	SAMN08872846	2018-05-10	15.558
Canis familiaris	PRJNA448733	SAMN08872847	2018-05-10	22.2698
Canis familiaris	PRJNA448733	SAMN08872848	2018-05-10	13.0034
Canis familiaris	PRJNA448733	SAMN08872850	2018-05-10	13.9483
Canis familiaris	PRJNA448733	SAMN08872851	2018-05-10	11.714
Canis familiaris	PRJNA448733	SAMN08872852	2018-05-10	18.8317
Canis familiaris	PRJNA448733	SAMN08872853	2018-05-10	16.0048
Canis familiaris	PRJNA448733	SAMN08872854	2018-05-10	15.0194
Canis familiaris	PRJNA448733	SAMN08872855	2018-05-10	15.3622
Canis familiaris	PRJNA448733	SAMN08872856	2018-05-10	15.2561
Canis familiaris	PRJNA448733	SAMN08872857	2018-05-10	16.199
Canis familiaris	PRJNA448733	SAMN08872858	2018-05-10	46.8669
Canis familiaris	PRJNA448733	SAMN08872866	2018-05-10	47.7429
Canis familiaris	PRJNA448733	SAMN08872867	2018-05-10	9.05346
Canis familiaris	PRJNA448733	SAMN08872868	2018-05-10	9.91996
Canis familiaris	PRJNA448733	SAMN08872869	2018-05-10	8.96039
Canis familiaris	PRJNA448733	SAMN08872870	2018-05-10	7.32298
Canis familiaris	PRJNA448733	SAMN08872871	2018-05-10	8.35048
Canis familiaris	PRJNA448733	SAMN08872872	2018-05-10	8.28449
Canis familiaris	PRJNA448733	SAMN08872873	2018-05-10	9.22879
Canis familiaris	PRJNA448733	SAMN08872874	2018-05-10	8.3376
Canis familiaris	PRJNA448733	SAMN08872875	2018-05-10	10.8664
Canis familiaris	PRJNA448733	SAMN08872876	2018-05-10	10.2992
Canis familiaris	PRJNA448733	SAMN08872877	2018-05-10	8.2456
Canis familiaris	PRJNA448733	SAMN08872878	2018-05-10	10.8297
Canis familiaris	PRJNA448733	SAMN08872879	2018-05-10	8.37989
Canis familiaris	PRJNA448733	SAMN08872880	2018-05-10	9.68
Canis familiaris	PRJNA448733	SAMN08872881	2018-05-10	7.6342
Canis familiaris	PRJNA448733	SAMN08872882	2018-05-10	13.0326
Canis familiaris	PRJNA448733	SAMN08872906	2018-05-10	52.9589
Canis familiaris	PRJNA448733	SAMN08872908	2018-05-10	61.6379
Canis familiaris	PRJNA448733	SAMN08872909	2018-05-10	21.1176
Canis familiaris	PRJNA448733	SAMN08872913	2018-05-10	36.4575
Canis familiaris	PRJNA448733	SAMN08872915	2018-05-10	48.3255
Canis familiaris	PRJNA448733	SAMN08872916	2018-05-10	47.2119
Canis familiaris	PRJNA448733	SAMN08872917	2018-05-10	60.2132
Canis familiaris	PRJNA448733	SAMN08872919	2018-05-10	9.21332
Canis familiaris	PRJNA448733	SAMN08872920	2018-05-10	10.1768
Canis familiaris	PRJNA448733	SAMN08873033	2018-05-10	34.2132
Canis familiaris	PRJNA448733	SAMN08873034	2018-05-10	28.0766
Canis familiaris	PRJNA448733	SAMN08873035	2018-05-10	34.0293
Canis familiaris	PRJNA448733	SAMN08873037	2018-05-10	31.3967
Canis familiaris	PRJNA448733	SAMN08873141	2018-05-10	31.9773
Canis familiaris	PRJNA448733	SAMN08873142	2018-05-10	32.7264
Canis familiaris	PRJNA448733	SAMN08873143	2018-05-10	33.29
Canis familiaris	PRJNA448733	SAMN08873144	2018-05-10	35.2082
Canis familiaris	PRJNA448733	SAMN08873145	2018-05-10	28.7576
Canis familiaris	PRJNA448733	SAMN08873146	2018-05-10	30.5814
Canis familiaris	PRJNA448733	SAMN08873148	2018-05-10	29.5579
Canis familiaris	PRJNA448733	SAMN08873160	2018-05-10	15.2174
Canis familiaris	PRJNA448733	SAMN08873161	2018-05-10	17.1619
Canis familiaris	PRJNA448733	SAMN08873162	2018-05-10	14.3717
Canis familiaris	PRJNA448733	SAMN08873174	2018-05-10	17.3982
Canis familiaris	PRJNA448733	SAMN08873176	2018-05-10	16.3743
Canis familiaris	PRJNA448733	SAMN08873177	2018-05-10	16.4301
Canis familiaris	PRJNA448733	SAMN08873244	2018-05-10	33.7109
Canis familiaris	PRJNA448733	SAMN08873245	2018-05-10	31.2549
Canis familiaris	PRJNA448733	SAMN08873246	2018-05-10	33.3898
Canis familiaris	PRJNA448733	SAMN08873270	2018-05-10	17.2491
Canis familiaris	PRJNA448733	SAMN08873328	2018-05-10	15.7584
Canis familiaris	PRJNA448733	SAMN08873329	2018-05-10	9.06906
Canis familiaris	PRJNA448733	SAMN08873330	2018-05-10	9.53526
Canis familiaris	PRJNA448733	SAMN08873331	2018-05-10	11.8281
Canis familiaris	PRJNA448733	SAMN08873332	2018-05-10	9.25916
Canis familiaris	PRJNA448733	SAMN08873333	2018-05-10	6.94528
Canis familiaris	PRJNA448733	SAMN08873334	2018-05-10	5.36077
Canis familiaris	PRJNA448733	SAMN08873335	2018-05-10	11.8318
Canis familiaris	PRJNA448733	SAMN08873336	2018-05-10	9.75108
Canis familiaris	PRJNA448733	SAMN08873337	2018-05-10	11.1088
Canis familiaris	PRJNA448733	SAMN08873338	2018-05-10	10.896
Canis familiaris	PRJNA448733	SAMN08873339	2018-05-10	11.9435
Canis familiaris	PRJNA448733	SAMN08873447	2018-05-10	18.7869
Canis familiaris	PRJNA448733	SAMN08873448	2018-05-10	25.9239
Canis familiaris	PRJNA448733	SAMN08873449	2018-05-10	26.42
Canis familiaris	PRJNA448733	SAMN08873450	2018-05-10	22.4923
Canis familiaris	PRJNA448733	SAMN08873451	2018-05-10	15.5701
Canis familiaris	PRJNA448733	SAMN08873452	2018-05-10	21.5574
Canis familiaris	PRJNA448733	SAMN08873453	2018-05-10	16.2406
Canis familiaris	PRJNA448733	SAMN08873454	2018-05-10	22.2111
Canis familiaris	PRJNA448733	SAMN08873455	2018-05-10	6.95475
Canis familiaris	PRJNA448733	SAMN08873456	2018-05-10	16.7184
Canis familiaris	PRJNA448733	SAMN08873457	2018-05-10	16.2095
Canis familiaris	PRJNA448733	SAMN08873458	2018-05-10	17.01
Canis familiaris	PRJNA448733	SAMN08873459	2018-05-10	16.5405
Canis familiaris	PRJNA448733	SAMN08873460	2018-05-10	17.5875
Canis familiaris	PRJNA448733	SAMN08873462	2018-05-10	15.3024
Canis familiaris	PRJNA448733	SAMN08873463	2018-05-10	15.6066
Canis familiaris	PRJNA448733	SAMN08873464	2018-05-10	15.6924
Canis familiaris	PRJNA448733	SAMN08873465	2018-05-10	17.2912
Canis familiaris	PRJNA448733	SAMN08873466	2018-05-10	16.7452
Canis familiaris	PRJNA448733	SAMN08873467	2018-05-10	19.2415
Canis familiaris	PRJNA448733	SAMN08873468	2018-05-10	15.5771
Canis familiaris	PRJNA448733	SAMN08873469	2018-05-10	16.0728
Canis familiaris	PRJNA448733	SAMN08873470	2018-05-10	27.8456
Canis familiaris	PRJNA448733	SAMN08873471	2018-05-10	16.9864
Canis familiaris	PRJNA448733	SAMN08873472	2018-05-10	15.3567
Canis familiaris	PRJNA448733	SAMN08873473	2018-05-10	13.5564
Canis familiaris	PRJNA448733	SAMN08873474	2018-05-10	16.1606
Canis familiaris	PRJNA448733	SAMN08873475	2018-05-10	11.8289
Canis familiaris	PRJNA448733	SAMN08873476	2018-05-10	26.9405
Canis familiaris	PRJNA448733	SAMN08873477	2018-05-10	15.7245
Canis familiaris	PRJNA448733	SAMN08873478	2018-05-10	15.2421
Canis familiaris	PRJNA448733	SAMN08873479	2018-05-10	15.9829
Canis familiaris	PRJNA448733	SAMN08873480	2018-05-10	18.4909
Canis familiaris	PRJNA448733	SAMN08873481	2018-05-10	16.131
Canis familiaris	PRJNA448733	SAMN08873482	2018-05-10	17.309
Canis familiaris	PRJNA448733	SAMN08873483	2018-05-10	14.9865
Canis familiaris	PRJNA448733	SAMN08873484	2018-05-10	18.9094
Canis familiaris	PRJNA448733	SAMN08873485	2018-05-10	15.44
Canis familiaris	PRJNA448733	SAMN08873486	2018-05-10	18.8544
Canis familiaris	PRJNA448733	SAMN08873487	2018-05-10	15.1889
Canis familiaris	PRJNA448733	SAMN08873488	2018-05-10	18.3852
Canis familiaris	PRJNA448733	SAMN08873489	2018-05-10	13.8558
Canis familiaris	PRJNA448733	SAMN08873490	2018-05-10	27.0908
Canis familiaris	PRJNA448733	SAMN08873491	2018-05-10	15.2843
Canis familiaris	PRJNA448733	SAMN08873492	2018-05-10	13.46
Canis familiaris	PRJNA448733	SAMN08873493	2018-05-10	13.9849
Canis familiaris	PRJNA448733	SAMN08873494	2018-05-10	23.4998
Canis familiaris	PRJNA448733	SAMN08873495	2018-05-10	17.6521
Canis familiaris	PRJNA448733	SAMN08873496	2018-05-10	20.3162
Canis familiaris	PRJNA448733	SAMN08873497	2018-05-10	18.242
Canis familiaris	PRJNA448733	SAMN08873498	2018-05-10	15.0892
Canis familiaris	PRJNA448733	SAMN08873499	2018-05-10	16.1839
Canis familiaris	PRJNA448733	SAMN08873500	2018-05-10	13.3366
Canis familiaris	PRJNA448733	SAMN08873501	2018-05-10	14.9331
Canis familiaris	PRJNA448733	SAMN08873502	2018-05-10	16.8165
Canis familiaris	PRJNA448733	SAMN08873503	2018-05-10	15.5736
Canis familiaris	PRJNA448733	SAMN08873504	2018-05-10	22.5438
Canis familiaris	PRJNA448733	SAMN08873505	2018-05-10	17.5074
Canis familiaris	PRJNA448733	SAMN08873506	2018-05-10	16.388
Canis familiaris	PRJNA448733	SAMN08873507	2018-05-10	7.77518
Canis familiaris	PRJNA448733	SAMN08873508	2018-05-10	15.5956
Canis familiaris	PRJNA448733	SAMN08873509	2018-05-10	19.0755
Canis familiaris	PRJNA448733	SAMN08873510	2018-05-10	17.4237
Canis familiaris	PRJNA448733	SAMN08873511	2018-05-10	18.4186
Canis familiaris	PRJNA448733	SAMN08873512	2018-05-10	16.4425
Canis familiaris	PRJNA448733	SAMN08873513	2018-05-10	15.8368
Canis familiaris	PRJNA448733	SAMN08873514	2018-05-10	1.79251
Canis familiaris	PRJNA448733	SAMN08873515	2018-05-10	15.5096
Canis familiaris	PRJNA448733	SAMN08873516	2018-05-10	15.6398
Canis familiaris	PRJNA448733	SAMN08873517	2018-05-10	17.7672
Canis familiaris	PRJNA448733	SAMN08873518	2018-05-10	15.7205
Canis familiaris	PRJNA448733	SAMN08873519	2018-05-10	16.5873
Canis familiaris	PRJNA448733	SAMN08873036	2018-05-10	34.7888
Canis familiaris	PRJNA448733	SAMN08872849	2018-05-12	45.681
Canis familiaris	PRJNA448733	SAMN08872905	2018-05-12	50.6365
Canis familiaris	PRJNA448733	SAMN08872914	2018-05-12	40.0706
Canis familiaris	PRJNA448733	SAMN08873038	2018-05-12	31.597
Canis familiaris	PRJNA448733	SAMN08873188	2018-05-12	62.8814
Canis familiaris	PRJNA448733	SAMN08873461	2018-05-12	28.4212
Canis familiaris	PRJNA448733	SAMN08872859	2018-05-14	14.3649
Canis familiaris	PRJNA448733	SAMN08872918	2018-05-14	93.6111
Canis familiaris	PRJNA448733	SAMN08872976	2018-05-14	33.793
Canis familiaris	PRJNA448733	SAMN08873011	2018-05-14	41.365
Canis familiaris	PRJNA448733	SAMN08873012	2018-05-14	41.2006
Canis familiaris	PRJNA448733	SAMN08873062	2018-05-14	40.4273
Canis familiaris	PRJNA448733	SAMN08873112	2018-05-14	46.0532
Canis familiaris	PRJNA448733	SAMN08873115	2018-05-14	54.5912
Canis familiaris	PRJNA448733	SAMN08873116	2018-05-14	52.6373
Canis familiaris	PRJNA448733	SAMN08873117	2018-05-14	52.0057
Canis familiaris	PRJNA448733	SAMN08873243	2018-05-14	31.018
Canis familiaris	PRJNA448733	SAMN08873318	2018-05-14	9.88082
Canis familiaris	PRJNA448733	SAMN08873319	2018-05-14	10.7229
Canis familiaris	PRJNA448733	SAMN08873321	2018-05-14	7.40208
Canis familiaris	PRJNA448733	SAMN08873322	2018-05-14	5.54185
Canis familiaris	PRJNA448733	SAMN08873323	2018-05-14	11.4888
Canis familiaris	PRJNA448733	SAMN08872926	2018-05-15	40.6031
Canis familiaris	PRJNA448733	SAMN08873139	2018-05-15	15.6555
Canis familiaris	PRJNA448733	SAMN08873128	2018-05-16	43.244
Canis familiaris	PRJNA448733	SAMN08873130	2018-05-16	48.5371
Canis familiaris	PRJNA448733	SAMN08873155	2018-05-16	39.8593
Canis familiaris	PRJNA448733	SAMN08873175	2018-05-16	52.7322
Canis familiaris	PRJNA448733	SAMN08873199	2018-05-16	40.4488
Canis familiaris	PRJNA448733	SAMN08873219	2018-05-16	42.4286
Canis familiaris	PRJNA448733	SAMN08873220	2018-05-16	54.6215
Canis familiaris	PRJNA448733	SAMN08873221	2018-05-16	14.5041
Canis familiaris	PRJNA448733	SAMN08873222	2018-05-16	18.1644
Canis familiaris	PRJNA448733	SAMN08873223	2018-05-16	22.8349
Canis familiaris	PRJNA448733	SAMN08873224	2018-05-16	15.2392
Canis familiaris	PRJNA448733	SAMN08873225	2018-05-16	21.1767
Canis familiaris	PRJNA448733	SAMN08873226	2018-05-16	18.9974
Canis familiaris	PRJNA448733	SAMN08873227	2018-05-16	34.0407
Canis familiaris	PRJNA448733	SAMN08873228	2018-05-16	15.1443
Canis familiaris	PRJNA448733	SAMN08873229	2018-05-16	21.7368
Canis familiaris	PRJNA448733	SAMN08873251	2018-05-16	50.6539
Canis familiaris	PRJNA448733	SAMN08873258	2018-05-16	50.2159
Canis familiaris	PRJNA448733	SAMN08873262	2018-05-16	43.9662
Canis familiaris	PRJNA448733	SAMN08873264	2018-05-16	30.9707
Canis familiaris	PRJNA448733	SAMN08873423	2018-05-16	44.3327
Canis familiaris	PRJNA448733	SAMN08873428	2018-05-16	30.1447
Canis familiaris	PRJNA448733	SAMN08873429	2018-05-16	29.0192
Canis familiaris	PRJNA421138	SAMN08132858	2018-05-22	27.9472
Canis familiaris	PRJNA448733	SAMN08873147	2018-06-13	29.9022
Canis familiaris	PRJNA448733	SAMN08873247	2018-06-13	29.0709
Canis familiaris	PRJNA476342	SAMN09430726	2018-06-15	40.8148
Canis familiaris	PRJNA476342	SAMN09430724	2018-06-16	40.3367
Canis familiaris	PRJNA476342	SAMN09430725	2018-06-16	40.3014
Canis familiaris	PRJNA476342	SAMN09430727	2018-06-16	38.3478
Canis familiaris	PRJEB22148	SAMEA104211055	2018-07-07	101.775
Canis familiaris	PRJEB22148	SAMEA104211056	2018-07-07	50.0586
Canis familiaris	PRJEB22148	SAMEA104211057	2018-07-07	99.1883
Canis familiaris	PRJEB22148	SAMEA104211058	2018-07-07	45.6495
Canis familiaris	PRJNA389682	SAMN07205120	2018-07-09	19.9723
Canis familiaris	PRJNA389682	SAMN07205121	2018-07-09	37.3165
Canis familiaris	PRJNA389682	SAMN07205122	2018-07-09	46.3553
Canis familiaris	PRJNA389682	SAMN07205123	2018-07-09	34.7654
Canis familiaris	PRJNA389682	SAMN07205124	2018-07-09	48.3387
Canis familiaris	PRJNA389682	SAMN07205125	2018-07-09	34.8623
Canis familiaris	PRJNA389294	SAMN07376261	2018-08-01	51.8935
Canis familiaris	PRJNA389294	SAMN07376262	2018-08-01	57.4918
Canis familiaris	PRJNA389294	SAMN07376263	2018-08-01	51.4227
Canis familiaris	PRJNA389294	SAMN07376264	2018-08-01	47.0596
Canis familiaris	PRJNA389294	SAMN07376265	2018-08-01	61.9226
Canis familiaris	PRJNA389294	SAMN07376266	2018-08-01	49.3135
Canis familiaris	PRJNA389294	SAMN07376267	2018-08-01	50.4237
Canis familiaris	PRJNA389294	SAMN07376268	2018-08-01	54.8473
Canis familiaris	PRJNA389294	SAMN07376269	2018-08-01	47.5057
Canis familiaris	PRJNA389294	SAMN07376270	2018-08-01	61.5366
Canis familiaris	PRJNA389294	SAMN07376271	2018-08-01	55.7528
Canis familiaris	PRJNA389294	SAMN07376272	2018-08-01	59.1735
Canis familiaris	PRJNA389294	SAMN07376273	2018-08-01	65.5556
Canis familiaris	PRJEB16012	SAMEA4848665	2018-08-23	11.5387
Canis familiaris	PRJEB16012	SAMEA4848666	2018-08-23	11.2253
Canis familiaris	PRJEB16012	SAMEA4848667	2018-08-23	8.18487
Canis familiaris	PRJEB16012	SAMEA4848668	2018-08-23	11.6012
Canis familiaris	PRJEB16012	SAMEA4848669	2018-08-23	11.6462
Canis familiaris	PRJEB16012	SAMEA4848670	2018-08-23	10.0323
Canis familiaris	PRJEB16012	SAMEA4848671	2018-08-23	10.9721
Canis familiaris	PRJEB16012	SAMEA4848672	2018-08-23	10.9662
Canis familiaris	PRJEB16012	SAMEA4848673	2018-08-23	11.7384
Canis familiaris	PRJEB16012	SAMEA4848674	2018-08-23	11.338
Canis familiaris	PRJEB16012	SAMEA4848675	2018-08-23	11.5222
Canis familiaris	PRJEB16012	SAMEA4848676	2018-08-23	15.5274
Canis familiaris	PRJEB16012	SAMEA4848677	2018-08-23	17.5423
Canis familiaris	PRJEB16012	SAMEA4848678	2018-08-23	19.8997
Canis familiaris	PRJEB16012	SAMEA4848679	2018-08-23	18.9669
Canis familiaris	PRJEB16012	SAMEA4848680	2018-08-23	16.8832
Canis familiaris	PRJEB16012	SAMEA4848681	2018-08-23	12.2112
Canis familiaris	PRJEB16012	SAMEA4848682	2018-08-23	18.9113
Canis familiaris	PRJEB16012	SAMEA4848683	2018-08-23	17.2094
Canis familiaris	PRJEB16012	SAMEA4848690	2018-08-23	24.3524
Canis familiaris	PRJEB16012	SAMEA4848691	2018-08-23	24.1367
Canis familiaris	PRJEB16012	SAMEA4848692	2018-08-23	22.7553
Canis familiaris	PRJEB16012	SAMEA4848693	2018-08-23	25.4814
Canis familiaris	PRJEB16012	SAMEA4848694	2018-08-23	22.9898
Canis familiaris	PRJEB16012	SAMEA4848695	2018-08-23	27.2763
Canis familiaris	PRJEB16012	SAMEA4848696	2018-08-23	24.2011
Canis familiaris	PRJEB16012	SAMEA4848697	2018-08-23	25.2726
Canis familiaris	PRJEB16012	SAMEA4848698	2018-08-23	27.4023
Canis familiaris	PRJEB16012	SAMEA4848700	2018-08-23	23.2416
Canis familiaris	PRJEB16012	SAMEA4848701	2018-08-23	22.0834
Canis familiaris	PRJEB16012	SAMEA4848702	2018-08-23	25.5064
Canis familiaris	PRJEB16012	SAMEA4848703	2018-08-23	22.149
Canis familiaris	PRJEB16012	SAMEA4848704	2018-08-23	25.8419
Canis familiaris	PRJEB16012	SAMEA4848705	2018-08-23	30.4952
Canis familiaris	PRJEB16012	SAMEA4848706	2018-08-23	32.9024
Canis familiaris	PRJEB16012	SAMEA4848707	2018-08-23	37.0085
Canis familiaris	PRJEB16012	SAMEA4848708	2018-08-23	29.0395
Canis familiaris	PRJEB16012	SAMEA4848709	2018-08-23	47.7837
Canis familiaris	PRJEB16012	SAMEA4848710	2018-08-23	36.0789
Canis familiaris	PRJEB16012	SAMEA4848711	2018-08-23	35.2418
Canis familiaris	PRJEB16012	SAMEA4848712	2018-08-23	37.1129
Canis familiaris	PRJEB16012	SAMEA4848713	2018-08-23	24.3643
Canis familiaris	PRJEB16012	SAMEA4848714	2018-08-23	26.7987
Canis familiaris	PRJEB16012	SAMEA4867919	2018-08-29	20.4812
Canis familiaris	PRJEB16012	SAMEA4867920	2018-08-29	12.928
Canis familiaris	PRJEB16012	SAMEA4867921	2018-08-29	39.0062
Canis familiaris	PRJEB16012	SAMEA4867922	2018-08-29	20.0189
Canis familiaris	PRJEB16012	SAMEA4867923	2018-08-29	24.9549
Canis familiaris	PRJEB16012	SAMEA4867924	2018-08-29	22.7261
Canis familiaris	PRJEB16012	SAMEA4867925	2018-08-29	19.4401
Canis familiaris	PRJEB16012	SAMEA4867926	2018-08-29	27.4829
Canis familiaris	PRJEB16012	SAMEA4867927	2018-08-29	24.3503
Canis familiaris	PRJEB16012	SAMEA4867928	2018-08-29	24.6088
Canis familiaris	PRJEB16012	SAMEA4867929	2018-08-29	25.356
Canis familiaris	PRJEB16012	SAMEA4867930	2018-08-29	31.469
Canis familiaris	PRJEB16012	SAMEA4867931	2018-08-29	29.2953
Canis familiaris	PRJEB16012	SAMEA4867932	2018-08-29	31.8226
Canis familiaris	PRJEB16012	SAMEA4867933	2018-08-29	41.1117
Canis familiaris	PRJEB16012	SAMEA4867934	2018-08-29	36.3311
Canis familiaris	PRJEB16012	SAMEA4867935	2018-08-29	30.2939
Canis familiaris	PRJEB16012	SAMEA4867936	2018-08-29	27.3854
Canis familiaris	PRJEB16012	SAMEA4873254	2018-08-31	36.6262
Canis familiaris	PRJNA491400	SAMN10077097	2018-09-30	30.3216
Canis familiaris	PRJNA491400	SAMN10077098	2018-09-30	30.5349
Canis familiaris	PRJNA491400	SAMN10077099	2018-09-30	27.8966
Canis familiaris	PRJEB28877	SAMEA4949388	2018-10-08	4.0712
Canis familiaris	PRJEB28877	SAMEA4949389	2018-10-08	3.6546
Canis familiaris	PRJEB28877	SAMEA4949390	2018-10-08	4.16005
Canis familiaris	PRJNA494719	SAMN10174932	2018-10-09	20.553
Canis familiaris	PRJNA494719	SAMN10174933	2018-10-09	21.7464
Canis familiaris	PRJNA494719	SAMN10174936	2018-10-09	22.1324
Canis familiaris	PRJEB21485	SAMEA104139329	2018-10-25	27.7272
Canis familiaris	PRJEB28141	SAMEA4823359	2018-10-25	34.1401
Canis familiaris	PRJEB22955	SAMEA104345830	2018-10-25	61.516
Canis familiaris	PRJEB28141	SAMEA4823343	2018-10-25	39.914
Canis familiaris	PRJEB28141	SAMEA4823353	2018-10-25	22.2721
Canis familiaris	PRJEB28141	SAMEA4823354	2018-10-25	44.0849
Canis familiaris	PRJEB28141	SAMEA4823355	2018-10-25	39.1183
Canis familiaris	PRJEB28141	SAMEA4823356	2018-10-25	41.3415
Canis familiaris	PRJEB28141	SAMEA4823357	2018-10-25	27.0567
Canis familiaris	PRJEB28141	SAMEA4823358	2018-10-25	35.3514
Canis familiaris	PRJEB28141	SAMEA4823360	2018-10-25	13.0336
Canis familiaris	PRJNA503969	SAMN10386546	2018-11-06	12.3848
Canis familiaris	PRJNA503969	SAMN10386547	2018-11-06	53.294
Canis familiaris	PRJNA503969	SAMN10386548	2018-11-06	40.1249
Canis familiaris	PRJNA503969	SAMN10386549	2018-11-06	56.5144
Canis familiaris	PRJNA503969	SAMN10386550	2018-11-06	38.5222
Canis familiaris	PRJNA503969	SAMN10386551	2018-11-06	38.5996
Canis familiaris	PRJNA503969	SAMN10386553	2018-11-06	38.8932
Canis familiaris	PRJNA503969	SAMN10386554	2018-11-06	57.3122
Canis familiaris	PRJNA503969	SAMN10386555	2018-11-06	41.7538
Canis familiaris	PRJNA503969	SAMN10386556	2018-11-06	41.831
Canis familiaris	PRJNA503969	SAMN10386557	2018-11-06	44.3589
Canis familiaris	PRJNA503969	SAMN10386558	2018-11-06	17.2658
Canis familiaris	PRJNA503969	SAMN10386559	2018-11-06	20.8685
Canis familiaris	PRJNA503969	SAMN10386552	2018-11-07	56.593
Canis familiaris	PRJEB16012	SAMEA5059499	2018-11-09	12.7902
Canis familiaris	PRJEB16012	SAMEA5059500	2018-11-09	10.8856
Canis familiaris	PRJEB16012	SAMEA5059501	2018-11-09	11.3491
Canis familiaris	PRJEB16012	SAMEA5059502	2018-11-09	10.1668
Canis familiaris	PRJEB16012	SAMEA5059503	2018-11-09	8.58224
Canis familiaris	PRJEB16012	SAMEA5059504	2018-11-09	16.1259
Canis familiaris	PRJEB16012	SAMEA5059505	2018-11-09	12.9155
Canis familiaris	PRJEB16012	SAMEA5059506	2018-11-09	7.71969
Canis familiaris	PRJEB16012	SAMEA5059507	2018-11-09	10.8431
Canis familiaris	PRJEB16012	SAMEA5059508	2018-11-09	11.7486
Canis familiaris	PRJEB16012	SAMEA5059509	2018-11-09	7.98353
Canis familiaris	PRJEB16012	SAMEA5059510	2018-11-09	12.2498
Canis familiaris	PRJEB16012	SAMEA5059511	2018-11-09	12.5287
Canis familiaris	PRJEB16012	SAMEA5059512	2018-11-09	2.84371
Canis familiaris	PRJEB16012	SAMEA5059513	2018-11-09	0.00650968
Canis familiaris	PRJEB16012	SAMEA5059514	2018-11-09	12.6377
Canis familiaris	PRJEB16012	SAMEA5059515	2018-11-09	11.9861
Canis familiaris	PRJEB16012	SAMEA5059516	2018-11-09	13.1459
Canis familiaris	PRJEB16012	SAMEA5059517	2018-11-09	28.9578
Canis familiaris	PRJEB16012	SAMEA5059518	2018-11-09	12.4819
Canis familiaris	PRJEB16012	SAMEA5059519	2018-11-09	0.311249
Canis familiaris	PRJEB16012	SAMEA5059520	2018-11-09	13.306
Canis familiaris	PRJEB16012	SAMEA5059521	2018-11-09	14.2761
Canis familiaris	PRJEB16012	SAMEA5059522	2018-11-09	12.7436
Canis familiaris	PRJEB16012	SAMEA5059523	2018-11-09	12.8543
Canis familiaris	PRJNA487459	SAMN09882737	2018-11-30	31.6538
Canis familiaris	PRJNA487459	SAMN09882739	2018-11-30	40.4494
Canis familiaris	PRJEB23066	SAMEA104363589	2018-12-10	55.6025
Canis familiaris	PRJEB23066	SAMEA104363593	2018-12-10	47.3697
Canis familiaris	PRJEB23066	SAMEA104363604	2018-12-10	51.1093
Canis familiaris	PRJEB23066	SAMEA104363610	2018-12-10	47.9852
Canis familiaris	PRJEB23066	SAMEA104363614	2018-12-10	56.7213
Canis familiaris	PRJNA486818	SAMN09865705	2018-12-20	13.7759
Canis familiaris	PRJNA486818	SAMN09865706	2018-12-20	12.9745
Canis familiaris	PRJNA486818	SAMN09865707	2018-12-20	12.2091
Canis familiaris	PRJNA486818	SAMN09865708	2018-12-20	11.4116
Canis familiaris	PRJNA486818	SAMN09865709	2018-12-20	14.3811
Canis familiaris	PRJEB16012	SAMEA5209171	2019-01-24	54.6559
Canis familiaris	PRJEB16012	SAMEA5209173	2019-01-24	54.6185
Canis familiaris	PRJEB16012	SAMEA5209179	2019-01-24	55.2583
Canis familiaris	PRJEB16012	SAMEA5209187	2019-01-24	55.2144
Canis familiaris	PRJEB16012	SAMEA5209192	2019-01-24	54.1891
Canis familiaris	PRJEB16012	SAMEA5209193	2019-01-24	13.9268
Canis familiaris	PRJEB16012	SAMEA5209198	2019-01-24	13.3734
Canis familiaris	PRJEB16012	SAMEA5209200	2019-01-24	13.5832
Canis familiaris	PRJEB16012	SAMEA5209170	2019-01-24	55.5196
Canis familiaris	PRJEB16012	SAMEA5209176	2019-01-24	56.0885
Canis familiaris	PRJEB16012	SAMEA5209177	2019-01-24	53.0604
Canis familiaris	PRJEB16012	SAMEA5209185	2019-01-24	50.9654
Canis familiaris	PRJEB16012	SAMEA5209186	2019-01-24	50.5471
Canis familiaris	PRJEB16012	SAMEA5209199	2019-01-24	15.1382
Canis familiaris	PRJEB16012	SAMEA5204133	2019-01-24	14.3363
Canis familiaris	PRJEB16012	SAMEA5204134	2019-01-24	20.4487
Canis familiaris	PRJEB16012	SAMEA5209172	2019-01-24	52.7529
Canis familiaris	PRJEB16012	SAMEA5209181	2019-01-24	54.9289
Canis familiaris	PRJEB16012	SAMEA5209182	2019-01-24	14.6237
Canis familiaris	PRJEB16012	SAMEA5209201	2019-01-24	54.9418
Canis familiaris	PRJEB16012	SAMEA5204132	2019-01-24	28.4296
Canis familiaris	PRJEB16012	SAMEA5204135	2019-01-24	27.4035
Canis familiaris	PRJEB16012	SAMEA5209175	2019-01-24	53.6601
Canis familiaris	PRJEB16012	SAMEA5209189	2019-01-24	55.7397
Canis familiaris	PRJEB16012	SAMEA5209195	2019-01-24	49.8825
Canis familiaris	PRJEB16012	SAMEA5209197	2019-01-24	15.7553
Canis familiaris	PRJEB16012	SAMEA5209178	2019-01-24	54.0292
Canis familiaris	PRJEB16012	SAMEA5209180	2019-01-24	22.9952
Canis familiaris	PRJEB16012	SAMEA5209184	2019-01-24	55.0258
Canis familiaris	PRJEB16012	SAMEA5209191	2019-01-24	51.9489
Canis familiaris	PRJEB16012	SAMEA5209174	2019-01-24	52.4482
Canis familiaris	PRJEB16012	SAMEA5209183	2019-01-24	14.0851
Canis familiaris	PRJEB16012	SAMEA5209188	2019-01-24	55.7358
Canis familiaris	PRJEB16012	SAMEA5209190	2019-01-24	51.9809
Canis familiaris	PRJEB16012	SAMEA5209194	2019-01-24	56.0788
Canis familiaris	PRJEB16012	SAMEA5209196	2019-01-24	13.2384
Canis familiaris	PRJEB16012	SAMEA5209202	2019-01-24	15.0939
Canis familiaris	PRJEB16012	SAMEA5209203	2019-01-24	49.3868
Canis familiaris	PRJNA512874	SAMN10689944	2019-01-31	36.0207
Canis familiaris	PRJEB23066	SAMEA104427625	2019-02-13	49.9797
Canis familiaris	PRJEB28163	SAMEA4825461	2019-02-15	0.0134782
Canis familiaris	PRJEB28163	SAMEA4825462	2019-02-15	0.0047794
Canis familiaris	PRJEB28163	SAMEA4825468	2019-02-15	0.00880126
Canis familiaris	PRJEB28163	SAMEA4825466	2019-02-15	0.0054492
Canis familiaris	PRJEB28163	SAMEA4825470	2019-02-15	0.00534756
Canis familiaris	PRJEB28163	SAMEA4825471	2019-02-15	0.00399632
Canis familiaris	PRJEB28163	SAMEA4825464	2019-02-15	0.00468176
Canis familiaris	PRJEB28163	SAMEA4825469	2019-02-15	0.0043194
Canis familiaris	PRJEB28163	SAMEA4825463	2019-02-15	0.00574796
Canis familiaris	PRJEB28163	SAMEA4825465	2019-02-15	0.0050208
Canis familiaris	PRJEB28163	SAMEA4825467	2019-02-15	0.00484239
Canis familiaris	PRJNA263947	SAMN10940759	2019-02-23	4.78196
Canis familiaris	PRJNA263947	SAMN10940760	2019-02-23	35.6235
Canis familiaris	PRJNA263947	SAMN10940764	2019-02-23	16.5958
Canis familiaris	PRJNA263947	SAMN10940765	2019-02-23	15.8153
Canis familiaris	PRJNA263947	SAMN10940766	2019-02-23	12.3887
Canis familiaris	PRJNA263947	SAMN10940767	2019-02-23	3.78284
Canis familiaris	PRJNA263947	SAMN10940778	2019-02-23	37.0382
Canis familiaris	PRJNA263947	SAMN10940780	2019-02-23	38.9446
Canis familiaris	PRJNA263947	SAMN10940781	2019-02-23	24.5645
Canis familiaris	PRJNA263947	SAMN10940804	2019-02-23	38.7712
Canis familiaris	PRJNA263947	SAMN10940805	2019-02-23	42.0483
Canis familiaris	PRJNA263947	SAMN10940812	2019-02-23	37.6692
Canis familiaris	PRJNA263947	SAMN10940815	2019-02-23	36.3426
Canis familiaris	PRJNA263947	SAMN10940761	2019-02-23	16.128
Canis familiaris	PRJNA263947	SAMN10940762	2019-02-23	17.6991
Canis familiaris	PRJNA263947	SAMN10940763	2019-02-23	19.0726
Canis familiaris	PRJNA263947	SAMN10940772	2019-02-23	33.9188
Canis familiaris	PRJNA263947	SAMN10940776	2019-02-23	31.1409
Canis familiaris	PRJNA263947	SAMN10940782	2019-02-23	38.466
Canis familiaris	PRJNA263947	SAMN10940785	2019-02-23	39.0628
Canis familiaris	PRJNA263947	SAMN10940796	2019-02-23	33.0317
Canis familiaris	PRJNA263947	SAMN10940799	2019-02-23	31.1018
Canis familiaris	PRJNA263947	SAMN10940811	2019-02-23	39.5241
Canis familiaris	PRJNA263947	SAMN10940820	2019-02-23	21.062
Canis familiaris	PRJNA263947	SAMN10940774	2019-02-23	32.291
Canis familiaris	PRJNA263947	SAMN10940775	2019-02-23	36.2357
Canis familiaris	PRJNA263947	SAMN10940784	2019-02-23	32.6874
Canis familiaris	PRJNA263947	SAMN10940786	2019-02-23	31.8361
Canis familiaris	PRJNA263947	SAMN10940787	2019-02-23	35.3988
Canis familiaris	PRJNA263947	SAMN10940788	2019-02-23	29.3579
Canis familiaris	PRJNA263947	SAMN10940789	2019-02-23	27.9452
Canis familiaris	PRJNA263947	SAMN10940791	2019-02-23	32.42
Canis familiaris	PRJNA263947	SAMN10940793	2019-02-23	30.4673
Canis familiaris	PRJNA263947	SAMN10940801	2019-02-23	25.8551
Canis familiaris	PRJNA263947	SAMN10940803	2019-02-23	41.3531
Canis familiaris	PRJNA263947	SAMN10940807	2019-02-23	38.7208
Canis familiaris	PRJNA263947	SAMN10940818	2019-02-23	19.1476
Canis familiaris	PRJNA263947	SAMN10940825	2019-02-23	43.4726
Canis familiaris	PRJNA263947	SAMN10940769	2019-02-23	33.6294
Canis familiaris	PRJNA263947	SAMN10940777	2019-02-23	40.6668
Canis familiaris	PRJNA263947	SAMN10940790	2019-02-23	33.0625
Canis familiaris	PRJNA263947	SAMN10940808	2019-02-23	43.0413
Canis familiaris	PRJNA263947	SAMN10940816	2019-02-23	38.1456
Canis familiaris	PRJNA263947	SAMN10940819	2019-02-23	21.2685
Canis familiaris	PRJNA263947	SAMN10940821	2019-02-23	21.5343
Canis familiaris	PRJNA263947	SAMN10940824	2019-02-23	39.8247
Canis familiaris	PRJNA263947	SAMN10940826	2019-02-23	39.737
Canis familiaris	PRJNA263947	SAMN10940768	2019-02-23	16.5883
Canis familiaris	PRJNA263947	SAMN10940770	2019-02-23	34.7242
Canis familiaris	PRJNA263947	SAMN10940800	2019-02-23	37.3757
Canis familiaris	PRJNA263947	SAMN10940802	2019-02-23	51.2086
Canis familiaris	PRJNA263947	SAMN10940810	2019-02-23	39.2789
Canis familiaris	PRJNA263947	SAMN10940813	2019-02-23	37.6878
Canis familiaris	PRJNA263947	SAMN10940817	2019-02-23	38.574
Canis familiaris	PRJNA263947	SAMN10940823	2019-02-23	38.1721
Canis familiaris	PRJNA263947	SAMN10940827	2019-02-23	38.978
Canis familiaris	PRJNA263947	SAMN10940771	2019-02-23	38.916
Canis familiaris	PRJNA263947	SAMN10940773	2019-02-23	36.1518
Canis familiaris	PRJNA263947	SAMN10940779	2019-02-23	35.9155
Canis familiaris	PRJNA263947	SAMN10940783	2019-02-23	35.5758
Canis familiaris	PRJNA263947	SAMN10940792	2019-02-23	49.1046
Canis familiaris	PRJNA263947	SAMN10940794	2019-02-23	27.7647
Canis familiaris	PRJNA263947	SAMN10940795	2019-02-23	28.9635
Canis familiaris	PRJNA263947	SAMN10940797	2019-02-23	44.9808
Canis familiaris	PRJNA263947	SAMN10940798	2019-02-23	37.259
Canis familiaris	PRJNA263947	SAMN10940806	2019-02-23	40.5783
Canis familiaris	PRJNA263947	SAMN10940809	2019-02-23	37.5953
Canis familiaris	PRJNA263947	SAMN10940814	2019-02-23	38.3177
Canis familiaris	PRJNA263947	SAMN10940822	2019-02-23	19.4526
Canis familiaris	PRJEB26319	SAMEA4672966	2019-02-28	7.05132
Canis familiaris	PRJEB26319	SAMEA4672967	2019-02-28	7.51257
Canis familiaris	PRJEB26319	SAMEA4672968	2019-02-28	6.95887
Canis familiaris	PRJEB26319	SAMEA4672969	2019-02-28	18.9771
Canis familiaris	PRJEB30571	SAMEA5205218	2019-03-05	26.2792
Canis familiaris	PRJEB30571	SAMEA5205225	2019-03-05	19.1207
Canis familiaris	PRJEB30571	SAMEA5205212	2019-03-05	20.0798
Canis familiaris	PRJEB30571	SAMEA5205220	2019-03-05	29.3321
Canis familiaris	PRJEB30571	SAMEA5205223	2019-03-05	26.7089
Canis familiaris	PRJEB30571	SAMEA5205213	2019-03-05	24.254
Canis familiaris	PRJEB30571	SAMEA5205226	2019-03-05	27.0133
Canis familiaris	PRJEB30571	SAMEA5205227	2019-03-05	23.2448
Canis familiaris	PRJEB30571	SAMEA5205228	2019-03-05	23.925
Canis familiaris	PRJEB30571	SAMEA5205215	2019-03-05	25.1003
Canis familiaris	PRJEB30571	SAMEA5205216	2019-03-05	30.9624
Canis familiaris	PRJEB30571	SAMEA5205219	2019-03-05	22.192
Canis familiaris	PRJEB30571	SAMEA5205224	2019-03-05	23.3258
Canis familiaris	PRJEB30571	SAMEA5205221	2019-03-05	19.3152
Canis familiaris	PRJEB30571	SAMEA5205222	2019-03-05	19.8794
Canis familiaris	PRJEB30571	SAMEA5205229	2019-03-05	20.2723
Canis familiaris	PRJEB30571	SAMEA5205214	2019-03-05	22.06
Canis familiaris	PRJEB30571	SAMEA5205217	2019-03-05	13.4477
Canis familiaris	PRJNA486428	SAMN09845873	2019-05-01	20.5115
Canis familiaris	PRJNA486428	SAMN09845874	2019-05-01	23.4274
Canis familiaris	PRJNA396033	SAMN11526750	2019-05-02	42.7141
Canis familiaris	PRJNA396033	SAMN11526802	2019-05-02	47.7184
Canis familiaris	PRJNA396033	SAMN07419816	2019-05-02	39.2678
Canis familiaris	PRJNA396033	SAMN11526776	2019-05-02	49.694
Canis familiaris	PRJNA396033	SAMN11526829	2019-05-02	53.1245
Canis familiaris	PRJNA543738	SAMN11775869	2019-05-20	8.65338
Canis familiaris	PRJEB32096	SAMEA5560215	2019-05-21	58.3845
Canis familiaris	PRJEB32096	SAMEA5560216	2019-05-21	55.3765
Canis familiaris	PRJEB32096	SAMEA5560217	2019-05-21	59.4863
Canis familiaris	PRJEB32096	SAMEA5560218	2019-05-21	59.4354
Canis familiaris	PRJNA543738	SAMN11843684	2019-05-24	8.06769
Canis familiaris	PRJNA543738	SAMN11843695	2019-05-24	9.1938
Canis familiaris	PRJNA543738	SAMN11843698	2019-05-24	13.3504
Canis familiaris	PRJNA543738	SAMN11843701	2019-05-24	12.1284
Canis familiaris	PRJNA543738	SAMN11843702	2019-05-24	10.4872
Canis familiaris	PRJEB16012	SAMEA5657392	2019-05-25	32.0011
Canis familiaris	PRJEB16012	SAMEA5657394	2019-05-25	32.0928
Canis familiaris	PRJEB16012	SAMEA5657395	2019-05-25	16.4169
Canis familiaris	PRJEB16012	SAMEA5657396	2019-05-25	26.7811
Canis familiaris	PRJEB16012	SAMEA5657397	2019-05-25	39.8311
Canis familiaris	PRJEB16012	SAMEA5657398	2019-05-25	31.0715
Canis familiaris	PRJEB16012	SAMEA5657399	2019-05-25	18.8858
Canis familiaris	PRJEB16012	SAMEA5657400	2019-05-25	37.1278
Canis familiaris	PRJNA494411	SAMN10167127	2019-06-10	27.6464
Canis familiaris	PRJNA309755	SAMN09435548	2019-07-18	6.42459
Canis familiaris	PRJNA309755	SAMN09435549	2019-07-18	7.46623
Canis familiaris	PRJNA556278	SAMN12347403	2019-07-24	49.8459
Canis familiaris	PRJEB29115	SAMEA4966024	2019-07-30	40.542
Canis familiaris	PRJEB29115	SAMEA4966025	2019-07-30	58.687
Canis familiaris	PRJEB27499	SAMEA3906808	2019-08-02	1.68544
Canis familiaris	PRJEB27499	SAMEA3906811	2019-08-02	3.64399
Canis familiaris	PRJEB27499	SAMEA3906812	2019-08-02	3.61793
Canis familiaris	PRJEB27499	SAMEA3906815	2019-08-02	3.75802
Canis familiaris	PRJEB27499	SAMEA3906816	2019-08-02	2.93953
Canis familiaris	PRJEB27499	SAMEA3906822	2019-08-02	2.91203
Canis familiaris	PRJEB27499	SAMEA3906823	2019-08-02	3.84714
Canis familiaris	PRJEB27499	SAMEA3906827	2019-08-02	3.25204
Canis familiaris	PRJEB27499	SAMEA3906828	2019-08-02	3.09675
Canis familiaris	PRJEB27499	SAMEA3906829	2019-08-02	2.85037
Canis familiaris	PRJEB27499	SAMEA3906830	2019-08-02	2.70912
Canis familiaris	PRJEB27499	SAMEA3906831	2019-08-02	3.03931
Canis familiaris	PRJEB27499	SAMEA3906832	2019-08-02	2.98995
Canis familiaris	PRJEB27499	SAMEA3906835	2019-08-02	2.81031
Canis familiaris	PRJEB27499	SAMEA3906837	2019-08-02	2.35749
Canis familiaris	PRJEB27499	SAMEA3906838	2019-08-02	2.70744
Canis familiaris	PRJEB27499	SAMEA3906839	2019-08-02	2.33776
Canis familiaris	PRJEB27499	SAMEA3906840	2019-08-02	2.34427
Canis familiaris	PRJEB27499	SAMEA3906843	2019-08-02	2.31155
Canis familiaris	PRJEB27499	SAMEA3906844	2019-08-02	3.12609
Canis familiaris	PRJEB27499	SAMEA3906845	2019-08-02	3.09341
Canis familiaris	PRJEB27499	SAMEA3906846	2019-08-02	3.43792
Canis familiaris	PRJEB27499	SAMEA3906847	2019-08-02	2.64372
Canis familiaris	PRJEB27499	SAMEA3906849	2019-08-02	2.56984
Canis familiaris	PRJEB27499	SAMEA3906850	2019-08-02	3.69465
Canis familiaris	PRJEB27499	SAMEA3906851	2019-08-02	2.61045
Canis familiaris	PRJEB27499	SAMEA3906852	2019-08-02	1.14797
Canis familiaris	PRJEB27499	SAMEA3906853	2019-08-02	0.973778
Canis familiaris	PRJEB27499	SAMEA3906854	2019-08-02	2.87803
Canis familiaris	PRJEB27499	SAMEA3906855	2019-08-02	2.43545
Canis familiaris	PRJEB27499	SAMEA3906856	2019-08-02	2.69488
Canis familiaris	PRJEB27499	SAMEA3906857	2019-08-02	1.94516
Canis familiaris	PRJEB27499	SAMEA3906861	2019-08-02	1.85212
Canis familiaris	PRJEB27499	SAMEA3906863	2019-08-02	1.84462
Canis familiaris	PRJEB27499	SAMEA3906868	2019-08-02	2.05464
Canis familiaris	PRJEB27499	SAMEA3906869	2019-08-02	2.04663
Canis familiaris	PRJEB27499	SAMEA3906870	2019-08-02	2.07399
Canis familiaris	PRJEB27499	SAMEA3906876	2019-08-02	4.46117
Canis familiaris	PRJEB27499	SAMEA3906879	2019-08-02	4.82986
Canis familiaris	PRJEB27499	SAMEA3906880	2019-08-02	5.31485
Canis familiaris	PRJEB27499	SAMEA3906881	2019-08-02	1.63412
Canis familiaris	PRJEB27499	SAMEA3906882	2019-08-02	1.69128
Canis familiaris	PRJEB27499	SAMEA3906883	2019-08-02	4.31091
Canis familiaris	PRJEB27499	SAMEA3906884	2019-08-02	1.2921
Canis familiaris	PRJEB27499	SAMEA3906885	2019-08-02	3.86866
Canis familiaris	PRJEB27499	SAMEA3906886	2019-08-02	1.42231
Canis familiaris	PRJEB27499	SAMEA3906887	2019-08-02	3.65958
Canis familiaris	PRJEB27499	SAMEA3906888	2019-08-02	1.34924
Canis familiaris	PRJEB27499	SAMEA3906889	2019-08-02	4.08163
Canis familiaris	PRJEB27499	SAMEA3906893	2019-08-02	4.06594
Canis familiaris	PRJEB27499	SAMEA3906895	2019-08-02	5.43421
Canis familiaris	PRJEB27499	SAMEA3906896	2019-08-02	1.55427
Canis familiaris	PRJEB27499	SAMEA3906897	2019-08-02	5.37652
Canis familiaris	PRJEB27499	SAMEA3906898	2019-08-02	1.48311
Canis familiaris	PRJEB27499	SAMEA3906903	2019-08-02	4.17739
Canis familiaris	PRJEB27499	SAMEA3906904	2019-08-02	4.22453
Canis familiaris	PRJEB27499	SAMEA3906905	2019-08-02	3.66799
Canis familiaris	PRJEB27499	SAMEA3906906	2019-08-02	3.63194
Canis familiaris	PRJEB27499	SAMEA3906907	2019-08-02	3.56788
Canis familiaris	PRJEB27499	SAMEA3906909	2019-08-02	4.07741
Canis familiaris	PRJEB27499	SAMEA3906910	2019-08-02	3.87118
Canis familiaris	PRJEB27499	SAMEA3906911	2019-08-02	3.70502
Canis familiaris	PRJEB27499	SAMEA3906912	2019-08-02	3.84601
Canis familiaris	PRJEB27499	SAMEA3906913	2019-08-02	3.65972
Canis familiaris	PRJEB27499	SAMEA3906914	2019-08-02	1.77527
Canis familiaris	PRJEB27499	SAMEA3906916	2019-08-02	3.62734
Canis familiaris	PRJEB27499	SAMEA3906918	2019-08-02	3.72804
Canis familiaris	PRJEB27499	SAMEA3906919	2019-08-02	3.84576
Canis familiaris	PRJEB27499	SAMEA3906920	2019-08-02	1.78903
Canis familiaris	PRJEB27499	SAMEA3906921	2019-08-02	3.65497
Canis familiaris	PRJEB27499	SAMEA3906923	2019-08-02	3.65789
Canis familiaris	PRJEB27499	SAMEA3906925	2019-08-02	1.59092
Canis familiaris	PRJEB27499	SAMEA3906926	2019-08-02	3.85853
Canis familiaris	PRJEB27499	SAMEA3906927	2019-08-02	3.74522
Canis familiaris	PRJEB27499	SAMEA3906928	2019-08-02	2.35333
Canis familiaris	PRJEB27499	SAMEA3906929	2019-08-02	3.27541
Canis familiaris	PRJEB27499	SAMEA3906930	2019-08-02	2.91601
Canis familiaris	PRJEB27499	SAMEA3906931	2019-08-02	3.90802
Canis familiaris	PRJEB27499	SAMEA3906932	2019-08-02	3.22048
Canis familiaris	PRJEB27499	SAMEA3906933	2019-08-02	3.69219
Canis familiaris	PRJEB27499	SAMEA3906934	2019-08-02	3.40528
Canis familiaris	PRJEB27499	SAMEA3906937	2019-08-02	3.39652
Canis familiaris	PRJEB27499	SAMEA3906938	2019-08-02	2.83839
Canis familiaris	PRJEB27499	SAMEA3906941	2019-08-02	3.52817
Canis familiaris	PRJEB27499	SAMEA3906942	2019-08-02	2.97728
Canis familiaris	PRJEB27499	SAMEA3906943	2019-08-02	3.57809
Canis familiaris	PRJEB27499	SAMEA3906944	2019-08-02	3.10413
Canis familiaris	PRJEB27499	SAMEA3906946	2019-08-02	3.92124
Canis familiaris	PRJEB27499	SAMEA3906947	2019-08-02	3.31533
Canis familiaris	PRJEB27499	SAMEA3906948	2019-08-02	3.41467
Canis familiaris	PRJEB27499	SAMEA3906949	2019-08-02	3.01466
Canis familiaris	PRJEB27499	SAMEA3906950	2019-08-02	2.84216
Canis familiaris	PRJEB27499	SAMEA3906951	2019-08-02	3.47971
Canis familiaris	PRJEB27499	SAMEA3906952	2019-08-02	3.10802
Canis familiaris	PRJEB27499	SAMEA3906953	2019-08-02	3.47155
Canis familiaris	PRJEB27499	SAMEA3906954	2019-08-02	3.5315
Canis familiaris	PRJEB27499	SAMEA3906956	2019-08-02	3.72704
Canis familiaris	PRJEB27499	SAMEA3906957	2019-08-02	3.07259
Canis familiaris	PRJEB27499	SAMEA3906959	2019-08-02	4.26142
Canis familiaris	PRJEB27499	SAMEA3906960	2019-08-02	1.39211
Canis familiaris	PRJEB27499	SAMEA3906961	2019-08-02	3.97868
Canis familiaris	PRJEB27499	SAMEA3906964	2019-08-02	2.67197
Canis familiaris	PRJEB27499	SAMEA3906965	2019-08-02	3.93293
Canis familiaris	PRJEB27499	SAMEA3906966	2019-08-02	1.77492
Canis familiaris	PRJEB27499	SAMEA3906969	2019-08-02	2.54628
Canis familiaris	PRJEB27499	SAMEA3906970	2019-08-02	3.48704
Canis familiaris	PRJEB27499	SAMEA3906971	2019-08-02	2.75622
Canis familiaris	PRJEB27499	SAMEA3906972	2019-08-02	2.8855
Canis familiaris	PRJEB27499	SAMEA3906973	2019-08-02	3.885
Canis familiaris	PRJEB27499	SAMEA3906974	2019-08-02	1.9517
Canis familiaris	PRJEB27499	SAMEA3906975	2019-08-02	2.76138
Canis familiaris	PRJEB27499	SAMEA3906979	2019-08-02	3.70279
Canis familiaris	PRJEB27499	SAMEA3906980	2019-08-02	3.00475
Canis familiaris	PRJEB27499	SAMEA3906981	2019-08-02	3.47787
Canis familiaris	PRJEB27499	SAMEA3906982	2019-08-02	3.95239
Canis familiaris	PRJEB27499	SAMEA3906983	2019-08-02	2.8814
Canis familiaris	PRJEB27499	SAMEA3906985	2019-08-02	3.02762
Canis familiaris	PRJEB27499	SAMEA3906986	2019-08-02	4.14844
Canis familiaris	PRJEB27499	SAMEA3906987	2019-08-02	2.02355
Canis familiaris	PRJEB27499	SAMEA3906988	2019-08-02	3.21363
Canis familiaris	PRJEB27499	SAMEA3906989	2019-08-02	4.39166
Canis familiaris	PRJEB27499	SAMEA3906990	2019-08-02	3.42606
Canis familiaris	PRJEB27499	SAMEA3906991	2019-08-02	3.26981
Canis familiaris	PRJEB27499	SAMEA3906992	2019-08-02	4.01135
Canis familiaris	PRJEB27499	SAMEA3906993	2019-08-02	5.34534
Canis familiaris	PRJEB27499	SAMEA3906994	2019-08-02	4.77951
Canis familiaris	PRJEB27499	SAMEA3906995	2019-08-02	1.22762
Canis familiaris	PRJEB27499	SAMEA3907000	2019-08-02	5.22404
Canis familiaris	PRJEB27499	SAMEA3907006	2019-08-02	3.79841
Canis familiaris	PRJEB27499	SAMEA3907007	2019-08-02	1.7011
Canis familiaris	PRJEB27499	SAMEA3907009	2019-08-02	3.93411
Canis familiaris	PRJEB27499	SAMEA3907010	2019-08-02	3.89401
Canis familiaris	PRJEB27499	SAMEA3907011	2019-08-02	4.20535
Canis familiaris	PRJEB27499	SAMEA3907012	2019-08-02	3.93015
Canis familiaris	PRJEB27499	SAMEA3907014	2019-08-02	4.07784
Canis familiaris	PRJEB27499	SAMEA3907015	2019-08-02	3.24363
Canis familiaris	PRJEB27499	SAMEA3907016	2019-08-02	3.80889
Canis familiaris	PRJEB27499	SAMEA3907017	2019-08-02	3.82278
Canis familiaris	PRJEB27499	SAMEA3907018	2019-08-02	3.86505
Canis familiaris	PRJEB27499	SAMEA3907019	2019-08-02	4.08842
Canis familiaris	PRJEB27499	SAMEA3907020	2019-08-02	3.94624
Canis familiaris	PRJEB27499	SAMEA3907021	2019-08-02	3.51238
Canis familiaris	PRJEB27499	SAMEA3907022	2019-08-02	3.80682
Canis familiaris	PRJEB27499	SAMEA3907025	2019-08-02	3.16308
Canis familiaris	PRJEB27499	SAMEA3907026	2019-08-02	2.82764
Canis familiaris	PRJEB27499	SAMEA3907028	2019-08-02	4.18044
Canis familiaris	PRJEB27499	SAMEA3907029	2019-08-02	2.67851
Canis familiaris	PRJEB27499	SAMEA3907030	2019-08-02	3.8341
Canis familiaris	PRJEB27499	SAMEA3907031	2019-08-02	2.67637
Canis familiaris	PRJEB27499	SAMEA3907032	2019-08-02	3.87584
Canis familiaris	PRJEB27499	SAMEA3907033	2019-08-02	2.68724
Canis familiaris	PRJEB27499	SAMEA3907035	2019-08-02	3.89282
Canis familiaris	PRJEB27499	SAMEA3907036	2019-08-02	2.79748
Canis familiaris	PRJEB27499	SAMEA3907038	2019-08-02	3.88522
Canis familiaris	PRJEB27499	SAMEA3907039	2019-08-02	2.73874
Canis familiaris	PRJEB27499	SAMEA3907040	2019-08-02	4.10176
Canis familiaris	PRJEB27499	SAMEA3907041	2019-08-02	2.71332
Canis familiaris	PRJEB27499	SAMEA3907043	2019-08-02	3.82426
Canis familiaris	PRJEB27499	SAMEA3907044	2019-08-02	5.11893
Canis familiaris	PRJEB27499	SAMEA3907045	2019-08-02	5.32143
Canis familiaris	PRJEB27499	SAMEA3907046	2019-08-02	3.89739
Canis familiaris	PRJEB27499	SAMEA3907047	2019-08-02	2.45983
Canis familiaris	PRJEB27499	SAMEA3907048	2019-08-02	4.14817
Canis familiaris	PRJEB27499	SAMEA3907050	2019-08-02	3.43741
Canis familiaris	PRJEB27499	SAMEA3907051	2019-08-02	2.53354
Canis familiaris	PRJEB27499	SAMEA3907052	2019-08-02	4.08362
Canis familiaris	PRJEB27499	SAMEA3907053	2019-08-02	2.32397
Canis familiaris	PRJEB27499	SAMEA3907054	2019-08-02	3.49731
Canis familiaris	PRJEB27499	SAMEA3907056	2019-08-02	1.72632
Canis familiaris	PRJEB27499	SAMEA3907057	2019-08-02	2.48029
Canis familiaris	PRJEB27499	SAMEA3907058	2019-08-02	4.3714
Canis familiaris	PRJEB27499	SAMEA3907059	2019-08-02	2.33689
Canis familiaris	PRJEB27499	SAMEA3907060	2019-08-02	2.24094
Canis familiaris	PRJEB27499	SAMEA3907061	2019-08-02	3.60016
Canis familiaris	PRJEB27499	SAMEA3907062	2019-08-02	2.22674
Canis familiaris	PRJEB27499	SAMEA3907063	2019-08-02	2.55853
Canis familiaris	PRJEB27499	SAMEA3907064	2019-08-02	4.2177
Canis familiaris	PRJEB27499	SAMEA3907065	2019-08-02	2.99522
Canis familiaris	PRJEB27499	SAMEA3907066	2019-08-02	1.5189
Canis familiaris	PRJEB27499	SAMEA3907067	2019-08-02	3.86783
Canis familiaris	PRJEB27499	SAMEA3907068	2019-08-02	3.29547
Canis familiaris	PRJEB27499	SAMEA3907069	2019-08-02	3.96143
Canis familiaris	PRJEB27499	SAMEA3907070	2019-08-02	2.73209
Canis familiaris	PRJEB27499	SAMEA3907071	2019-08-02	3.80055
Canis familiaris	PRJEB27499	SAMEA3907072	2019-08-02	3.12095
Canis familiaris	PRJEB27499	SAMEA3907073	2019-08-02	4.04629
Canis familiaris	PRJEB27499	SAMEA3907076	2019-08-02	3.89239
Canis familiaris	PRJEB27499	SAMEA3907077	2019-08-02	2.57556
Canis familiaris	PRJEB27499	SAMEA3907079	2019-08-02	3.5713
Canis familiaris	PRJEB27499	SAMEA3907080	2019-08-02	1.50063
Canis familiaris	PRJEB27499	SAMEA3907083	2019-08-02	3.6861
Canis familiaris	PRJEB27499	SAMEA3907180	2019-08-02	4.24217
Canis familiaris	PRJEB27499	SAMEA3907182	2019-08-02	3.50153
Canis familiaris	PRJEB27499	SAMEA3907183	2019-08-02	2.82263
Canis familiaris	PRJEB27499	SAMEA3907184	2019-08-02	4.03542
Canis familiaris	PRJEB27499	SAMEA3907185	2019-08-02	3.18825
Canis familiaris	PRJEB27499	SAMEA3907186	2019-08-02	3.68336
Canis familiaris	PRJEB27499	SAMEA3907187	2019-08-02	3.70245
Canis familiaris	PRJEB27499	SAMEA3907188	2019-08-02	4.07463
Canis familiaris	PRJEB27499	SAMEA3907189	2019-08-02	4.19904
Canis familiaris	PRJEB27499	SAMEA3907190	2019-08-02	4.28711
Canis familiaris	PRJEB27499	SAMEA3907191	2019-08-02	4.46082
Canis familiaris	PRJEB27499	SAMEA3907192	2019-08-02	4.10164
Canis familiaris	PRJEB27499	SAMEA3907193	2019-08-02	4.44045
Canis familiaris	PRJEB27499	SAMEA3907194	2019-08-02	3.47601
Canis familiaris	PRJEB27499	SAMEA3907195	2019-08-02	3.01259
Canis familiaris	PRJEB27499	SAMEA3907196	2019-08-02	2.73502
Canis familiaris	PRJEB27499	SAMEA3907197	2019-08-02	3.33894
Canis familiaris	PRJEB27499	SAMEA3907198	2019-08-02	4.42617
Canis familiaris	PRJEB27499	SAMEA3907199	2019-08-02	3.67637
Canis familiaris	PRJEB27499	SAMEA3907200	2019-08-02	3.2549
Canis familiaris	PRJEB27499	SAMEA3907203	2019-08-02	3.86934
Canis familiaris	PRJEB27499	SAMEA3907204	2019-08-02	3.10315
Canis familiaris	PRJEB27499	SAMEA3907205	2019-08-02	4.23604
Canis familiaris	PRJEB27499	SAMEA3907206	2019-08-02	3.27179
Canis familiaris	PRJEB27499	SAMEA3907207	2019-08-02	4.8242
Canis familiaris	PRJEB27499	SAMEA3907208	2019-08-02	1.7911
Canis familiaris	PRJEB27499	SAMEA3907209	2019-08-02	3.44734
Canis familiaris	PRJEB27499	SAMEA3907210	2019-08-02	3.48705
Canis familiaris	PRJEB27499	SAMEA3907211	2019-08-02	3.26586
Canis familiaris	PRJEB27499	SAMEA3907212	2019-08-02	3.65628
Canis familiaris	PRJEB27499	SAMEA3907213	2019-08-02	3.53426
Canis familiaris	PRJEB27499	SAMEA3907214	2019-08-02	3.39559
Canis familiaris	PRJEB27499	SAMEA3907215	2019-08-02	3.72128
Canis familiaris	PRJEB27499	SAMEA3907216	2019-08-02	2.28821
Canis familiaris	PRJEB27499	SAMEA3907217	2019-08-02	3.81321
Canis familiaris	PRJEB27499	SAMEA3907218	2019-08-02	3.04289
Canis familiaris	PRJEB27499	SAMEA3907221	2019-08-02	4.0081
Canis familiaris	PRJEB27499	SAMEA3907222	2019-08-02	3.77078
Canis familiaris	PRJEB27499	SAMEA3907223	2019-08-02	3.31481
Canis familiaris	PRJEB27499	SAMEA3907224	2019-08-02	2.89576
Canis familiaris	PRJEB27499	SAMEA3907225	2019-08-02	2.71545
Canis familiaris	PRJEB27499	SAMEA3907226	2019-08-02	2.12465
Canis familiaris	PRJEB27499	SAMEA3907227	2019-08-02	3.41142
Canis familiaris	PRJEB27499	SAMEA3907230	2019-08-02	3.19926
Canis familiaris	PRJEB27499	SAMEA3907231	2019-08-02	4.47672
Canis familiaris	PRJEB27499	SAMEA3907232	2019-08-02	3.32165
Canis familiaris	PRJEB27499	SAMEA3907233	2019-08-02	3.06619
Canis familiaris	PRJEB27499	SAMEA3907234	2019-08-02	3.92848
Canis familiaris	PRJEB27499	SAMEA3907235	2019-08-02	3.43953
Canis familiaris	PRJEB27499	SAMEA3907236	2019-08-02	1.81615
Canis familiaris	PRJEB27499	SAMEA3907237	2019-08-02	4.44472
Canis familiaris	PRJEB27499	SAMEA3907238	2019-08-02	3.75659
Canis familiaris	PRJEB27499	SAMEA3907239	2019-08-02	3.35502
Canis familiaris	PRJEB27499	SAMEA3907240	2019-08-02	3.34431
Canis familiaris	PRJEB27499	SAMEA3907241	2019-08-02	2.66865
Canis familiaris	PRJEB27499	SAMEA3907242	2019-08-02	3.37212
Canis familiaris	PRJEB27499	SAMEA3907243	2019-08-02	6.45316
Canis familiaris	PRJEB27499	SAMEA3907259	2019-08-02	3.41239
Canis familiaris	PRJEB27499	SAMEA3907260	2019-08-02	3.65427
Canis familiaris	PRJEB27499	SAMEA3907261	2019-08-02	2.70272
Canis familiaris	PRJEB27499	SAMEA3907262	2019-08-02	3.56989
Canis familiaris	PRJEB27499	SAMEA3907263	2019-08-02	3.47364
Canis familiaris	PRJEB27499	SAMEA3907264	2019-08-02	4.1901
Canis familiaris	PRJEB27499	SAMEA3907265	2019-08-02	3.11284
Canis familiaris	PRJEB27499	SAMEA3907266	2019-08-02	3.13803
Canis familiaris	PRJEB27499	SAMEA3907267	2019-08-02	3.93303
Canis familiaris	PRJEB27499	SAMEA3907268	2019-08-02	2.8067
Canis familiaris	PRJEB27499	SAMEA3907269	2019-08-02	3.05267
Canis familiaris	PRJEB27499	SAMEA3907270	2019-08-02	2.41207
Canis familiaris	PRJEB27499	SAMEA3907271	2019-08-02	4.42448
Canis familiaris	PRJEB27499	SAMEA3907272	2019-08-02	2.4439
Canis familiaris	PRJEB27499	SAMEA3907273	2019-08-02	3.1561
Canis familiaris	PRJEB27499	SAMEA3907274	2019-08-02	3.03217
Canis familiaris	PRJEB27499	SAMEA3907275	2019-08-02	1.72017
Canis familiaris	PRJEB27499	SAMEA3907276	2019-08-02	4.14855
Canis familiaris	PRJEB27499	SAMEA3907277	2019-08-02	3.58695
Canis familiaris	PRJEB27499	SAMEA3907279	2019-08-02	4.30935
Canis familiaris	PRJEB27499	SAMEA3907280	2019-08-02	4.35986
Canis familiaris	PRJEB27499	SAMEA3907281	2019-08-02	5.90661
Canis familiaris	PRJEB27499	SAMEA3907282	2019-08-02	4.09487
Canis familiaris	PRJEB27499	SAMEA3907283	2019-08-02	3.30574
Canis familiaris	PRJEB27499	SAMEA3907285	2019-08-02	3.31746
Canis familiaris	PRJEB27499	SAMEA3907286	2019-08-02	4.56441
Canis familiaris	PRJEB27499	SAMEA3907287	2019-08-02	4.56039
Canis familiaris	PRJEB27499	SAMEA3907288	2019-08-02	3.10269
Canis familiaris	PRJEB27499	SAMEA3907289	2019-08-02	4.61086
Canis familiaris	PRJEB27499	SAMEA3907290	2019-08-02	2.64631
Canis familiaris	PRJEB27499	SAMEA3907291	2019-08-02	3.55622
Canis familiaris	PRJEB27499	SAMEA3907292	2019-08-02	2.42465
Canis familiaris	PRJEB27499	SAMEA3907293	2019-08-02	4.58863
Canis familiaris	PRJEB27499	SAMEA3907294	2019-08-02	3.27153
Canis familiaris	PRJEB27499	SAMEA3907295	2019-08-02	1.6159
Canis familiaris	PRJEB27499	SAMEA3907296	2019-08-02	3.0213
Canis familiaris	PRJEB27499	SAMEA3907300	2019-08-02	2.56186
Canis familiaris	PRJEB27499	SAMEA3907301	2019-08-02	3.28759
Canis familiaris	PRJEB27499	SAMEA3907302	2019-08-02	2.67527
Canis familiaris	PRJEB27499	SAMEA3907303	2019-08-02	2.84258
Canis familiaris	PRJEB27499	SAMEA3907304	2019-08-02	3.64621
Canis familiaris	PRJEB27499	SAMEA3907305	2019-08-02	5.09797
Canis familiaris	PRJEB27499	SAMEA3907306	2019-08-02	4.27746
Canis familiaris	PRJEB27499	SAMEA3907307	2019-08-02	2.83176
Canis familiaris	PRJEB27499	SAMEA3907308	2019-08-02	2.37673
Canis familiaris	PRJEB27499	SAMEA3907362	2019-08-02	3.75165
Canis familiaris	PRJEB27499	SAMEA3907363	2019-08-02	3.61767
Canis familiaris	PRJEB27499	SAMEA3907364	2019-08-02	3.3097
Canis familiaris	PRJEB27499	SAMEA3907365	2019-08-02	3.97968
Canis familiaris	PRJEB27499	SAMEA3907366	2019-08-02	3.00691
Canis familiaris	PRJEB27499	SAMEA3907367	2019-08-02	2.78524
Canis familiaris	PRJEB27499	SAMEA3907368	2019-08-02	3.81635
Canis familiaris	PRJEB27499	SAMEA3907369	2019-08-02	4.31338
Canis familiaris	PRJEB27499	SAMEA3907378	2019-08-02	3.43433
Canis familiaris	PRJEB27499	SAMEA3907380	2019-08-02	4.45426
Canis familiaris	PRJEB27499	SAMEA3907381	2019-08-02	3.45124
Canis familiaris	PRJEB27499	SAMEA3907382	2019-08-02	5.00348
Canis familiaris	PRJEB27499	SAMEA3907383	2019-08-02	3.0183
Canis familiaris	PRJEB27499	SAMEA3907384	2019-08-02	2.30525
Canis familiaris	PRJEB27499	SAMEA3907385	2019-08-02	2.96404
Canis familiaris	PRJEB27499	SAMEA3907386	2019-08-02	3.10222
Canis familiaris	PRJEB27499	SAMEA3907387	2019-08-02	3.14331
Canis familiaris	PRJEB27499	SAMEA3907388	2019-08-02	4.42127
Canis familiaris	PRJEB27499	SAMEA3907389	2019-08-02	5.03113
Canis familiaris	PRJEB27499	SAMEA3907390	2019-08-02	1.35626
Canis familiaris	PRJEB27499	SAMEA3907400	2019-08-02	3.75722
Canis familiaris	PRJEB27499	SAMEA3907401	2019-08-02	4.24395
Canis familiaris	PRJEB27499	SAMEA3907403	2019-08-02	4.26903
Canis familiaris	PRJEB27499	SAMEA3907407	2019-08-02	3.86723
Canis familiaris	PRJEB27499	SAMEA3907409	2019-08-02	3.96924
Canis familiaris	PRJEB27499	SAMEA3907410	2019-08-02	3.39519
Canis familiaris	PRJEB27499	SAMEA3907411	2019-08-02	3.80189
Canis familiaris	PRJEB27499	SAMEA3907412	2019-08-02	5.48595
Canis familiaris	PRJEB27499	SAMEA3907413	2019-08-02	4.14239
Canis familiaris	PRJEB27499	SAMEA3907414	2019-08-02	4.03882
Canis familiaris	PRJEB27499	SAMEA3907415	2019-08-02	2.47626
Canis familiaris	PRJEB27499	SAMEA3907416	2019-08-02	3.418
Canis familiaris	PRJEB27499	SAMEA3907417	2019-08-02	3.15144
Canis familiaris	PRJEB27499	SAMEA3907418	2019-08-02	3.49811
Canis familiaris	PRJEB27499	SAMEA3907419	2019-08-02	3.6178
Canis familiaris	PRJEB27499	SAMEA3907420	2019-08-02	4.46201
Canis familiaris	PRJEB27499	SAMEA3907421	2019-08-02	3.90607
Canis familiaris	PRJEB27499	SAMEA3907424	2019-08-02	3.02358
Canis familiaris	PRJEB27499	SAMEA3907425	2019-08-02	3.49156
Canis familiaris	PRJEB27499	SAMEA3907426	2019-08-02	1.53514
Canis familiaris	PRJEB27499	SAMEA3907427	2019-08-02	4.70467
Canis familiaris	PRJEB27499	SAMEA3907428	2019-08-02	5.03376
Canis familiaris	PRJEB27499	SAMEA3907430	2019-08-02	2.61893
Canis familiaris	PRJEB27499	SAMEA3907431	2019-08-02	2.39192
Canis familiaris	PRJEB27499	SAMEA3907433	2019-08-02	3.34898
Canis familiaris	PRJEB27499	SAMEA3907434	2019-08-02	3.29932
Canis familiaris	PRJEB27499	SAMEA3907435	2019-08-02	1.88288
Canis familiaris	PRJEB27499	SAMEA3907438	2019-08-02	1.71283
Canis familiaris	PRJEB27499	SAMEA3910718	2019-08-02	3.60658
Canis familiaris	PRJEB27499	SAMEA3910719	2019-08-02	3.72849
Canis familiaris	PRJEB27499	SAMEA3910721	2019-08-02	3.24137
Canis familiaris	PRJEB27499	SAMEA3910724	2019-08-02	2.76041
Canis familiaris	PRJEB27499	SAMEA3910746	2019-08-02	3.01718
Canis familiaris	PRJEB27499	SAMEA3910747	2019-08-02	3.61558
Canis familiaris	PRJEB27499	SAMEA3910748	2019-08-02	2.55403
Canis familiaris	PRJEB27499	SAMEA3910750	2019-08-02	3.26855
Canis familiaris	PRJEB27499	SAMEA3910752	2019-08-02	3.22048
Canis familiaris	PRJEB27499	SAMEA3910756	2019-08-02	6.39922
Canis familiaris	PRJEB27499	SAMEA3910758	2019-08-02	4.66663
Canis familiaris	PRJEB27499	SAMEA5804330	2019-08-02	2.92579
Canis familiaris	PRJEB27499	SAMEA5804331	2019-08-02	3.24565
Canis familiaris	PRJNA525883	SAMN11079512	2019-08-25	105.287
Canis familiaris	PRJNA525883	SAMN11079518	2019-08-25	107.051
Canis familiaris	PRJNA525883	SAMN11079527	2019-08-25	103.277
Canis familiaris	PRJNA525883	SAMN11079490	2019-08-25	52.9075
Canis familiaris	PRJNA525883	SAMN11079491	2019-08-25	121.87
Canis familiaris	PRJNA525883	SAMN11079502	2019-08-25	53.549
Canis familiaris	PRJNA525883	SAMN11079503	2019-08-25	97.9592
Canis familiaris	PRJNA525883	SAMN11079506	2019-08-25	119.085
Canis familiaris	PRJNA525883	SAMN11079508	2019-08-25	73.9754
Canis familiaris	PRJNA525883	SAMN11079520	2019-08-25	65.3221
Canis familiaris	PRJNA525883	SAMN11079521	2019-08-25	140.16
Canis familiaris	PRJNA525883	SAMN11079538	2019-08-25	55.2459
Canis familiaris	PRJNA525883	SAMN11079544	2019-08-25	54.181
Canis familiaris	PRJNA525883	SAMN11079484	2019-08-25	55.2098
Canis familiaris	PRJNA525883	SAMN11079511	2019-08-25	59.8558
Canis familiaris	PRJNA525883	SAMN11079530	2019-08-25	113.692
Canis familiaris	PRJNA525883	SAMN11079533	2019-08-25	116.819
Canis familiaris	PRJNA525883	SAMN11079536	2019-08-25	105.191
Canis familiaris	PRJNA525883	SAMN11079542	2019-08-25	118.046
Canis familiaris	PRJNA525883	SAMN11079545	2019-08-25	106.723
Canis familiaris	PRJNA525883	SAMN11079548	2019-08-25	54.0159
Canis familiaris	PRJNA525883	SAMN11079550	2019-08-25	69.7418
Canis familiaris	PRJNA525883	SAMN11079497	2019-08-25	146.67
Canis familiaris	PRJNA525883	SAMN11079500	2019-08-25	160.42
Canis familiaris	PRJNA525883	SAMN11079515	2019-08-25	109.271
Canis familiaris	PRJNA525883	SAMN11079517	2019-08-25	72.0333
Canis familiaris	PRJNA525883	SAMN11079481	2019-08-25	61.1693
Canis familiaris	PRJNA525883	SAMN11079482	2019-08-25	101.323
Canis familiaris	PRJNA525883	SAMN11079485	2019-08-25	131.401
Canis familiaris	PRJNA525883	SAMN11079493	2019-08-25	59.9615
Canis familiaris	PRJNA525883	SAMN11079499	2019-08-25	92.5805
Canis familiaris	PRJNA525883	SAMN11079505	2019-08-25	59.9317
Canis familiaris	PRJNA525883	SAMN11079524	2019-08-25	134.861
Canis familiaris	PRJNA525883	SAMN11079529	2019-08-25	59.1228
Canis familiaris	PRJNA525883	SAMN11079532	2019-08-25	60.8879
Canis familiaris	PRJNA525883	SAMN11079539	2019-08-25	104.086
Canis familiaris	PRJNA525883	SAMN11079541	2019-08-25	57.7616
Canis familiaris	PRJNA525883	SAMN11079551	2019-08-25	107.038
Canis familiaris	PRJNA525883	SAMN11079487	2019-08-25	62.1461
Canis familiaris	PRJNA525883	SAMN11079488	2019-08-25	108.389
Canis familiaris	PRJNA525883	SAMN11079494	2019-08-25	108.332
Canis familiaris	PRJNA525883	SAMN11079496	2019-08-25	59.9087
Canis familiaris	PRJNA525883	SAMN11079509	2019-08-25	123.214
Canis familiaris	PRJNA525883	SAMN11079514	2019-08-25	60.4027
Canis familiaris	PRJNA525883	SAMN11079523	2019-08-25	55.8257
Canis familiaris	PRJNA525883	SAMN11079526	2019-08-25	60.1332
Canis familiaris	PRJNA525883	SAMN11079535	2019-08-25	58.7508
Canis familiaris	PRJNA525883	SAMN11079547	2019-08-25	113.865
Canis familiaris	PRJEB32213	SAMEA5577245	2019-09-03	58.1425
Canis familiaris	PRJEB32213	SAMEA5577246	2019-09-03	53.5431
Canis familiaris	PRJNA517114	SAMN10740952	2019-09-04	12.1974
Canis familiaris	PRJNA517114	SAMN10740954	2019-09-04	13.1404
Canis familiaris	PRJNA517114	SAMN10740964	2019-09-04	7.24538
Canis familiaris	PRJNA517114	SAMN10740968	2019-09-04	18.0587
Canis familiaris	PRJNA517114	SAMN10740969	2019-09-04	16.0526
Canis familiaris	PRJNA517114	SAMN10740984	2019-09-04	8.04635
Canis familiaris	PRJNA517114	SAMN10740988	2019-09-04	13.3408
Canis familiaris	PRJNA517114	SAMN10740991	2019-09-04	11.2335
Canis familiaris	PRJNA517114	SAMN10740992	2019-09-04	10.3648
Canis familiaris	PRJNA517114	SAMN10740999	2019-09-04	12.556
Canis familiaris	PRJNA517114	SAMN10741002	2019-09-04	8.78558
Canis familiaris	PRJNA517114	SAMN10741010	2019-09-04	20.3769
Canis familiaris	PRJNA517114	SAMN10741012	2019-09-04	13.3949
Canis familiaris	PRJNA517114	SAMN10741024	2019-09-04	17.9628
Canis familiaris	PRJNA517114	SAMN10740940	2019-09-04	13.0247
Canis familiaris	PRJNA517114	SAMN10740945	2019-09-04	13.4369
Canis familiaris	PRJNA517114	SAMN10740975	2019-09-04	7.94205
Canis familiaris	PRJNA517114	SAMN10740983	2019-09-04	9.17378
Canis familiaris	PRJNA517114	SAMN10741003	2019-09-04	7.82462
Canis familiaris	PRJNA517114	SAMN10740939	2019-09-04	8.9948
Canis familiaris	PRJNA517114	SAMN10740948	2019-09-04	11.8517
Canis familiaris	PRJNA517114	SAMN10740949	2019-09-04	15.0794
Canis familiaris	PRJNA517114	SAMN10740950	2019-09-04	11.5952
Canis familiaris	PRJNA517114	SAMN10740962	2019-09-04	9.14197
Canis familiaris	PRJNA517114	SAMN10740965	2019-09-04	8.56203
Canis familiaris	PRJNA517114	SAMN10740967	2019-09-04	11.1708
Canis familiaris	PRJNA517114	SAMN10740972	2019-09-04	19.4187
Canis familiaris	PRJNA517114	SAMN10740987	2019-09-04	9.56498
Canis familiaris	PRJNA517114	SAMN10740989	2019-09-04	10.313
Canis familiaris	PRJNA517114	SAMN10740993	2019-09-04	9.67783
Canis familiaris	PRJNA517114	SAMN10740994	2019-09-04	12.9474
Canis familiaris	PRJNA517114	SAMN10740996	2019-09-04	9.65
Canis familiaris	PRJNA517114	SAMN10741001	2019-09-04	8.99554
Canis familiaris	PRJNA517114	SAMN10741005	2019-09-04	7.00562
Canis familiaris	PRJNA517114	SAMN10741019	2019-09-04	25.5833
Canis familiaris	PRJNA517114	SAMN10741022	2019-09-04	14.8458
Canis familiaris	PRJNA517114	SAMN10740942	2019-09-04	12.7795
Canis familiaris	PRJNA517114	SAMN10740943	2019-09-04	9.54039
Canis familiaris	PRJNA517114	SAMN10740951	2019-09-04	11.5582
Canis familiaris	PRJNA517114	SAMN10740959	2019-09-04	13.7653
Canis familiaris	PRJNA517114	SAMN10740963	2019-09-04	7.62664
Canis familiaris	PRJNA517114	SAMN10740970	2019-09-04	12.6927
Canis familiaris	PRJNA517114	SAMN10740977	2019-09-04	16.3644
Canis familiaris	PRJNA517114	SAMN10740990	2019-09-04	9.60354
Canis familiaris	PRJNA517114	SAMN10740995	2019-09-04	13.8304
Canis familiaris	PRJNA517114	SAMN10741004	2019-09-04	8.97055
Canis familiaris	PRJNA517114	SAMN10741011	2019-09-04	20.0975
Canis familiaris	PRJNA517114	SAMN10741014	2019-09-04	24.5051
Canis familiaris	PRJNA517114	SAMN10741015	2019-09-04	24.9324
Canis familiaris	PRJNA517114	SAMN10741016	2019-09-04	20.2141
Canis familiaris	PRJNA517114	SAMN10741017	2019-09-04	18.0567
Canis familiaris	PRJNA517114	SAMN10741018	2019-09-04	24.3304
Canis familiaris	PRJNA517114	SAMN10741023	2019-09-04	7.79451
Canis familiaris	PRJNA517114	SAMN10741025	2019-09-04	22.7529
Canis familiaris	PRJNA517114	SAMN10740946	2019-09-04	10.9199
Canis familiaris	PRJNA517114	SAMN10740947	2019-09-04	13.1256
Canis familiaris	PRJNA517114	SAMN10740955	2019-09-04	15.59
Canis familiaris	PRJNA517114	SAMN10740957	2019-09-04	12.8488
Canis familiaris	PRJNA517114	SAMN10740958	2019-09-04	10.5741
Canis familiaris	PRJNA517114	SAMN10740960	2019-09-04	15.9855
Canis familiaris	PRJNA517114	SAMN10740974	2019-09-04	17.2301
Canis familiaris	PRJNA517114	SAMN10740976	2019-09-04	8.1884
Canis familiaris	PRJNA517114	SAMN10740979	2019-09-04	8.42647
Canis familiaris	PRJNA517114	SAMN10740980	2019-09-04	11.3703
Canis familiaris	PRJNA517114	SAMN10740981	2019-09-04	8.54204
Canis familiaris	PRJNA517114	SAMN10740985	2019-09-04	11.9737
Canis familiaris	PRJNA517114	SAMN10740986	2019-09-04	8.46922
Canis familiaris	PRJNA517114	SAMN10741006	2019-09-04	12.2784
Canis familiaris	PRJNA517114	SAMN10741013	2019-09-04	16.3614
Canis familiaris	PRJNA517114	SAMN10741021	2019-09-04	25.6151
Canis familiaris	PRJNA517114	SAMN10741026	2019-09-04	18.2886
Canis familiaris	PRJNA517114	SAMN10740936	2019-09-04	12.2897
Canis familiaris	PRJNA517114	SAMN10740937	2019-09-04	13.4884
Canis familiaris	PRJNA517114	SAMN10740938	2019-09-04	13.5287
Canis familiaris	PRJNA517114	SAMN10740941	2019-09-04	13.5371
Canis familiaris	PRJNA517114	SAMN10740944	2019-09-04	11.6942
Canis familiaris	PRJNA517114	SAMN10740953	2019-09-04	8.22189
Canis familiaris	PRJNA517114	SAMN10740956	2019-09-04	14.0963
Canis familiaris	PRJNA517114	SAMN10740961	2019-09-04	9.40614
Canis familiaris	PRJNA517114	SAMN10740966	2019-09-04	9.90539
Canis familiaris	PRJNA517114	SAMN10740971	2019-09-04	16.5049
Canis familiaris	PRJNA517114	SAMN10740973	2019-09-04	8.46463
Canis familiaris	PRJNA517114	SAMN10740978	2019-09-04	18.0203
Canis familiaris	PRJNA517114	SAMN10740982	2019-09-04	12.1552
Canis familiaris	PRJNA517114	SAMN10740997	2019-09-04	13.8402
Canis familiaris	PRJNA517114	SAMN10740998	2019-09-04	15.3145
Canis familiaris	PRJNA517114	SAMN10741000	2019-09-04	8.78843
Canis familiaris	PRJNA517114	SAMN10741020	2019-09-04	21.0054
Canis familiaris	PRJNA263947	SAMN12700527	2019-09-06	33.9259
Canis familiaris	PRJNA263947	SAMN12700534	2019-09-06	54.8329
Canis familiaris	PRJNA263947	SAMN12700535	2019-09-06	51.2567
Canis familiaris	PRJNA263947	SAMN12700522	2019-09-06	35.2286
Canis familiaris	PRJNA263947	SAMN12700528	2019-09-06	36.7354
Canis familiaris	PRJNA263947	SAMN12700540	2019-09-06	46.4513
Canis familiaris	PRJNA263947	SAMN12700546	2019-09-06	49.5718
Canis familiaris	PRJNA263947	SAMN12700550	2019-09-06	54.43
Canis familiaris	PRJNA263947	SAMN12700520	2019-09-06	53.93
Canis familiaris	PRJNA263947	SAMN12700523	2019-09-06	34.7577
Canis familiaris	PRJNA263947	SAMN12700524	2019-09-06	46.1562
Canis familiaris	PRJNA263947	SAMN12700530	2019-09-06	29.6269
Canis familiaris	PRJNA263947	SAMN12700531	2019-09-06	25.7704
Canis familiaris	PRJNA263947	SAMN12700536	2019-09-06	45.0005
Canis familiaris	PRJNA263947	SAMN12700537	2019-09-06	51.9057
Canis familiaris	PRJNA263947	SAMN12700538	2019-09-06	49.4088
Canis familiaris	PRJNA263947	SAMN12700541	2019-09-06	48.7678
Canis familiaris	PRJNA263947	SAMN12700555	2019-09-06	26.0536
Canis familiaris	PRJNA263947	SAMN12700521	2019-09-06	38.1357
Canis familiaris	PRJNA263947	SAMN12700529	2019-09-06	32.9141
Canis familiaris	PRJNA263947	SAMN12700532	2019-09-06	22.8002
Canis familiaris	PRJNA263947	SAMN12700533	2019-09-06	32.0892
Canis familiaris	PRJNA263947	SAMN12700539	2019-09-06	39.7292
Canis familiaris	PRJNA263947	SAMN12700542	2019-09-06	51.3265
Canis familiaris	PRJNA263947	SAMN12700545	2019-09-06	53.8594
Canis familiaris	PRJNA263947	SAMN12700549	2019-09-06	45.9313
Canis familiaris	PRJNA263947	SAMN12700526	2019-09-06	36.6428
Canis familiaris	PRJNA263947	SAMN12700547	2019-09-06	43.2728
Canis familiaris	PRJNA263947	SAMN12700551	2019-09-06	56.7234
Canis familiaris	PRJNA263947	SAMN12700552	2019-09-06	25.3371
Canis familiaris	PRJNA263947	SAMN12700553	2019-09-06	25.5688
Canis familiaris	PRJNA263947	SAMN12700525	2019-09-06	46.5824
Canis familiaris	PRJNA263947	SAMN12700543	2019-09-06	52.0818
Canis familiaris	PRJNA263947	SAMN12700544	2019-09-06	47.6835
Canis familiaris	PRJNA263947	SAMN12700548	2019-09-06	56.1868
Canis familiaris	PRJNA263947	SAMN12700554	2019-09-06	24.6801
Canis familiaris	PRJNA563058	SAMN12667790	2019-10-01	12.6058
Canis familiaris	PRJEB33758	SAMEA5818551	2019-10-02	55.3137
Canis familiaris	PRJEB33758	SAMEA5818552	2019-10-02	56.3553
Canis familiaris	PRJNA576632	SAMN12999907	2019-11-06	43.293
Canis familiaris	PRJNA576632	SAMN12999906	2019-11-06	49.4617
Canis familiaris	PRJNA576632	SAMN12999910	2019-11-06	52.8904
Canis familiaris	PRJNA576632	SAMN12999911	2019-11-06	49.9228
Canis familiaris	PRJNA576632	SAMN12999908	2019-11-06	56.8942
Canis familiaris	PRJNA576632	SAMN12999909	2019-11-06	50.8168
Canis familiaris	PRJEB16012	SAMEA6245501	2019-11-27	34.9659
Canis familiaris	PRJEB16012	SAMEA6245499	2019-11-27	31.2779
Canis familiaris	PRJEB16012	SAMEA6245500	2019-11-27	32.6449
Canis familiaris	PRJEB16012	SAMEA6249486	2019-11-30	24.8028
Canis familiaris	PRJEB16012	SAMEA6249493	2019-11-30	26.1399
Canis familiaris	PRJEB16012	SAMEA6249497	2019-11-30	31.2331
Canis familiaris	PRJEB16012	SAMEA6249499	2019-11-30	27.6319
Canis familiaris	PRJEB16012	SAMEA6249484	2019-11-30	25.9299
Canis familiaris	PRJEB16012	SAMEA6249487	2019-11-30	22.9596
Canis familiaris	PRJEB16012	SAMEA6249489	2019-11-30	30.9895
Canis familiaris	PRJEB16012	SAMEA6249477	2019-11-30	21.3743
Canis familiaris	PRJEB16012	SAMEA6249479	2019-11-30	29.1473
Canis familiaris	PRJEB16012	SAMEA6249481	2019-11-30	24.7921
Canis familiaris	PRJEB16012	SAMEA6249488	2019-11-30	21.06
Canis familiaris	PRJEB16012	SAMEA6249494	2019-11-30	22.7031
Canis familiaris	PRJEB16012	SAMEA6249503	2019-11-30	20.6056
Canis familiaris	PRJEB16012	SAMEA6249482	2019-11-30	30.3653
Canis familiaris	PRJEB16012	SAMEA6249491	2019-11-30	22.4654
Canis familiaris	PRJEB16012	SAMEA6249496	2019-11-30	40.0197
Canis familiaris	PRJEB16012	SAMEA6249504	2019-11-30	18.8769
Canis familiaris	PRJEB16012	SAMEA6249478	2019-11-30	25.0453
Canis familiaris	PRJEB16012	SAMEA6249485	2019-11-30	21.998
Canis familiaris	PRJEB16012	SAMEA6249490	2019-11-30	30.2833
Canis familiaris	PRJEB16012	SAMEA6249498	2019-11-30	35.1572
Canis familiaris	PRJEB16012	SAMEA6249501	2019-11-30	38.9593
Canis familiaris	PRJEB16012	SAMEA6249500	2019-11-30	28.0313
Canis familiaris	PRJEB16012	SAMEA6249502	2019-11-30	35.1609
Canis familiaris	PRJEB16012	SAMEA6258987	2019-11-30	31.5219
Canis familiaris	PRJEB16012	SAMEA6249480	2019-11-30	19.5858
Canis familiaris	PRJEB16012	SAMEA6249483	2019-11-30	26.053
Canis familiaris	PRJEB16012	SAMEA6249492	2019-11-30	22.0486
Canis familiaris	PRJEB16012	SAMEA6249495	2019-11-30	23.1594
Canis familiaris	PRJNA263947	SAMN13655891	2019-12-24	33.0827
Canis familiaris	PRJNA263947	SAMN13655900	2019-12-24	31.4005
Canis familiaris	PRJNA263947	SAMN13655908	2019-12-24	33.8811
Canis familiaris	PRJNA263947	SAMN13655907	2019-12-24	29.8986
Canis familiaris	PRJNA263947	SAMN13655888	2019-12-24	35.1843
Canis familiaris	PRJNA263947	SAMN13655896	2019-12-24	26.4383
Canis familiaris	PRJNA263947	SAMN13655901	2019-12-24	27.364
Canis familiaris	PRJNA263947	SAMN13655889	2019-12-25	40.1614
Canis familiaris	PRJNA263947	SAMN13655909	2019-12-25	41.256
Canis familiaris	PRJNA263947	SAMN13655910	2019-12-25	38.5868
Canis familiaris	PRJNA263947	SAMN13655918	2019-12-25	36.9614
Canis familiaris	PRJNA263947	SAMN13655923	2019-12-25	32.0043
Canis familiaris	PRJNA263947	SAMN13655905	2019-12-25	30.3356
Canis familiaris	PRJNA263947	SAMN13655921	2019-12-25	35.7397
Canis familiaris	PRJNA263947	SAMN13655890	2019-12-25	31.0589
Canis familiaris	PRJNA263947	SAMN13655892	2019-12-25	49.6935
Canis familiaris	PRJNA263947	SAMN13655895	2019-12-25	32.5874
Canis familiaris	PRJNA263947	SAMN13655898	2019-12-25	34.7373
Canis familiaris	PRJNA263947	SAMN13655912	2019-12-25	27.8736
Canis familiaris	PRJNA263947	SAMN13655913	2019-12-25	49.4725
Canis familiaris	PRJNA263947	SAMN13655922	2019-12-25	44.4555
Canis familiaris	PRJNA263947	SAMN13655906	2019-12-25	32.516
Canis familiaris	PRJNA263947	SAMN13655915	2019-12-25	43.8847
Canis familiaris	PRJNA263947	SAMN13655919	2019-12-25	35.101
Canis familiaris	PRJNA263947	SAMN13655894	2019-12-25	38.0674
Canis familiaris	PRJNA263947	SAMN13655897	2019-12-25	36.358
Canis familiaris	PRJNA263947	SAMN13655899	2019-12-25	33.6595
Canis familiaris	PRJNA263947	SAMN13655902	2019-12-25	36.8237
Canis familiaris	PRJNA263947	SAMN13655911	2019-12-25	48.192
Canis familiaris	PRJNA263947	SAMN13655914	2019-12-25	50.0123
Canis familiaris	PRJNA263947	SAMN13655893	2019-12-25	35.0667
Canis familiaris	PRJNA263947	SAMN13655903	2019-12-25	33.8997
Canis familiaris	PRJNA263947	SAMN13655904	2019-12-25	42.2997
Canis familiaris	PRJNA263947	SAMN13655916	2019-12-25	41.7328
Canis familiaris	PRJNA263947	SAMN13655917	2019-12-25	50.5985
Canis familiaris	PRJNA263947	SAMN13655920	2019-12-25	37.9398
Canis familiaris	PRJNA509599	SAMN10584881	2020-01-12	26.4267
Canis familiaris	PRJNA579792	SAMN13133747	2020-01-28	44.921
Canis familiaris	PRJNA579792	SAMN13133749	2020-01-28	53.1083
Canis familiaris	PRJNA579792	SAMN13133756	2020-01-28	55.3451
Canis familiaris	PRJNA579792	SAMN13133760	2020-01-28	55.3118
Canis familiaris	PRJNA579792	SAMN13133763	2020-01-28	37.3014
Canis familiaris	PRJNA579792	SAMN13133772	2020-01-28	38.9885
Canis familiaris	PRJNA579792	SAMN13133775	2020-01-28	47.9125
Canis familiaris	PRJNA579792	SAMN13133776	2020-01-28	49.0043
Canis familiaris	PRJNA579792	SAMN13133777	2020-01-28	41.9038
Canis familiaris	PRJNA579792	SAMN13133778	2020-01-28	41.1448
Canis familiaris	PRJNA579792	SAMN13133780	2020-01-28	45.154
Canis familiaris	PRJNA579792	SAMN13133785	2020-01-28	73.6811
Canis familiaris	PRJNA579792	SAMN13133791	2020-01-28	36.5017
Canis familiaris	PRJNA579792	SAMN13133793	2020-01-28	41.1002
Canis familiaris	PRJNA579792	SAMN13133795	2020-01-28	41.6459
Canis familiaris	PRJNA579792	SAMN13133803	2020-01-28	45.8243
Canis familiaris	PRJNA579792	SAMN13133806	2020-01-28	52.8547
Canis familiaris	PRJNA579792	SAMN13133823	2020-01-28	42.4444
Canis familiaris	PRJNA579792	SAMN13133824	2020-01-28	41.3969
Canis familiaris	PRJNA579792	SAMN13133746	2020-01-28	75.5876
Canis familiaris	PRJNA579792	SAMN13133751	2020-01-28	51.1971
Canis familiaris	PRJNA579792	SAMN13133752	2020-01-28	52.1986
Canis familiaris	PRJNA579792	SAMN13133753	2020-01-28	51.4383
Canis familiaris	PRJNA579792	SAMN13133758	2020-01-28	54.0858
Canis familiaris	PRJNA579792	SAMN13133761	2020-01-28	54.4222
Canis familiaris	PRJNA579792	SAMN13133762	2020-01-28	50.2723
Canis familiaris	PRJNA579792	SAMN13133765	2020-01-28	105.13
Canis familiaris	PRJNA579792	SAMN13133766	2020-01-28	40.5686
Canis familiaris	PRJNA579792	SAMN13133773	2020-01-28	41.6398
Canis familiaris	PRJNA579792	SAMN13133783	2020-01-28	34.8237
Canis familiaris	PRJNA579792	SAMN13133787	2020-01-28	39.3019
Canis familiaris	PRJNA579792	SAMN13133790	2020-01-28	40.7104
Canis familiaris	PRJNA579792	SAMN13133792	2020-01-28	37.6665
Canis familiaris	PRJNA579792	SAMN13133807	2020-01-28	39.9845
Canis familiaris	PRJNA579792	SAMN13133812	2020-01-28	85.0009
Canis familiaris	PRJNA579792	SAMN13133814	2020-01-28	38.4512
Canis familiaris	PRJNA579792	SAMN13133817	2020-01-28	31.9131
Canis familiaris	PRJNA579792	SAMN13133818	2020-01-28	33.1473
Canis familiaris	PRJNA579792	SAMN13133819	2020-01-28	38.6588
Canis familiaris	PRJNA579792	SAMN13133821	2020-01-28	43.9958
Canis familiaris	PRJNA579792	SAMN13133750	2020-01-28	92.0721
Canis familiaris	PRJNA579792	SAMN13133754	2020-01-28	43.5316
Canis familiaris	PRJNA579792	SAMN13133755	2020-01-28	52.3101
Canis familiaris	PRJNA579792	SAMN13133757	2020-01-28	56.8203
Canis familiaris	PRJNA579792	SAMN13133768	2020-01-28	52.1267
Canis familiaris	PRJNA579792	SAMN13133771	2020-01-28	46.6183
Canis familiaris	PRJNA579792	SAMN13133779	2020-01-28	42.4089
Canis familiaris	PRJNA579792	SAMN13133797	2020-01-28	41.8293
Canis familiaris	PRJNA579792	SAMN13133798	2020-01-28	38.8114
Canis familiaris	PRJNA579792	SAMN13133802	2020-01-28	39.9917
Canis familiaris	PRJNA579792	SAMN13133804	2020-01-28	88.5692
Canis familiaris	PRJNA579792	SAMN13133810	2020-01-28	34.334
Canis familiaris	PRJNA579792	SAMN13133811	2020-01-28	39.8353
Canis familiaris	PRJNA579792	SAMN13133813	2020-01-28	48.979
Canis familiaris	PRJNA579792	SAMN13133816	2020-01-28	53.7123
Canis familiaris	PRJNA579792	SAMN13133820	2020-01-28	42.5476
Canis familiaris	PRJNA579792	SAMN13133822	2020-01-28	38.3411
Canis familiaris	PRJNA579792	SAMN13133769	2020-01-28	100.401
Canis familiaris	PRJNA579792	SAMN13133781	2020-01-28	38.9738
Canis familiaris	PRJNA579792	SAMN13133782	2020-01-28	35.606
Canis familiaris	PRJNA579792	SAMN13133784	2020-01-28	36.2222
Canis familiaris	PRJNA579792	SAMN13133786	2020-01-28	39.4904
Canis familiaris	PRJNA579792	SAMN13133799	2020-01-28	53.2074
Canis familiaris	PRJNA579792	SAMN13133801	2020-01-28	49.6776
Canis familiaris	PRJNA579792	SAMN13133805	2020-01-28	37.6746
Canis familiaris	PRJNA579792	SAMN13133808	2020-01-28	47.0016
Canis familiaris	PRJNA579792	SAMN13133815	2020-01-28	47.6996
Canis familiaris	PRJNA579792	SAMN13133826	2020-01-28	45.885
Canis familiaris	PRJNA579792	SAMN13133748	2020-01-28	44.8172
Canis familiaris	PRJNA579792	SAMN13133759	2020-01-28	28.485
Canis familiaris	PRJNA579792	SAMN13133767	2020-01-28	54.69
Canis familiaris	PRJNA579792	SAMN13133770	2020-01-28	104.662
Canis familiaris	PRJNA579792	SAMN13133788	2020-01-28	84.3216
Canis familiaris	PRJNA579792	SAMN13133794	2020-01-28	85.1196
Canis familiaris	PRJNA579792	SAMN13133796	2020-01-28	40.1852
Canis familiaris	PRJNA579792	SAMN13133800	2020-01-28	49.6983
Canis familiaris	PRJNA579792	SAMN13133809	2020-01-28	92.7732
Canis familiaris	PRJNA579792	SAMN13133825	2020-01-28	46.5968
Canis familiaris	PRJNA579792	SAMN13133764	2020-01-28	49.9386
Canis familiaris	PRJNA579792	SAMN13133774	2020-01-28	59.666
Canis familiaris	PRJNA579792	SAMN13133789	2020-01-28	37.9426
Canis familiaris	PRJNA560083	SAMN12567870	2020-02-17	25.9066
Canis familiaris	PRJNA560083	SAMN12567871	2020-02-17	16.2328
Canis familiaris	PRJNA515838	SAMN13672482	2020-02-21	25.2904
Canis familiaris	PRJNA515838	SAMN13672483	2020-02-21	32.8907
Canis familiaris	PRJNA586720	SAMN13164793	2020-03-10	56.7916
Canis familiaris	PRJNA586720	SAMN13164794	2020-03-10	57.759
Canis familiaris	PRJNA491400	SAMN14422718	2020-03-23	27.2219
Canis familiaris	PRJNA399441	SAMN07678141	2020-03-26	62.3084
Canis familiaris	PRJEB35554	SAMEA6246836	2020-04-01	11.601
Canis familiaris	PRJEB35554	SAMEA6246837	2020-04-01	8.07353
Canis familiaris	PRJEB35554	SAMEA6246838	2020-04-01	9.53747
Canis familiaris	PRJEB35554	SAMEA6246839	2020-04-01	3.36855
Canis familiaris	PRJEB35554	SAMEA6246840	2020-04-01	3.8095
Canis familiaris	PRJEB35554	SAMEA6246842	2020-04-01	2.88461
Canis familiaris	PRJEB35554	SAMEA6246843	2020-04-01	4.64413
Canis familiaris	PRJEB35554	SAMEA6246845	2020-04-01	2.14855
Canis familiaris	PRJEB35554	SAMEA6246846	2020-04-01	2.03433
Canis familiaris	PRJEB35554	SAMEA6246848	2020-04-01	1.84332
Canis familiaris	PRJEB35554	SAMEA6246852	2020-04-01	1.90872
Canis familiaris	PRJEB35554	SAMEA6246854	2020-04-01	3.32934
Canis familiaris	PRJEB35554	SAMEA6246844	2020-04-01	1.80387
Canis familiaris	PRJEB35554	SAMEA6246847	2020-04-01	1.53165
Canis familiaris	PRJEB35554	SAMEA6246849	2020-04-01	2.3767
Canis familiaris	PRJEB35554	SAMEA6246850	2020-04-01	2.55117
Canis familiaris	PRJEB35554	SAMEA6246851	2020-04-01	1.66358
Canis familiaris	PRJEB35554	SAMEA6246853	2020-04-01	1.70591
Canis familiaris	PRJEB35554	SAMEA6246855	2020-04-01	1.59934
Canis familiaris	PRJEB35554	SAMEA6246856	2020-04-01	2.10296
Canis familiaris	PRJEB35554	SAMEA6246858	2020-04-01	1.68695
Canis familiaris	PRJEB35554	SAMEA6246841	2020-04-01	3.24361
Canis familiaris	PRJEB35554	SAMEA6246857	2020-04-01	1.6947
Canis familiaris	PRJNA608847	SAMN14210374	2020-04-30	22.4991
Canis familiaris	PRJNA608847	SAMN14210375	2020-04-30	13.4899
Canis familiaris	PRJNA608847	SAMN14210376	2020-04-30	14.5788
Canis familiaris	PRJNA608847	SAMN14210377	2020-04-30	36.2937
Canis familiaris	PRJNA608847	SAMN14210378	2020-04-30	49.9666
Canis familiaris	PRJNA608847	SAMN14210379	2020-04-30	26.5343
Canis familiaris	PRJNA608847	SAMN14210380	2020-04-30	10.0401
Canis familiaris	PRJNA608847	SAMN14210381	2020-04-30	14.8268
Canis familiaris	PRJNA608847	SAMN14210382	2020-04-30	10.826
Canis familiaris	PRJNA608847	SAMN14210383	2020-04-30	16.5175
Canis familiaris	PRJNA630029	SAMN14820583	2020-05-06	30.4629
Canis familiaris	PRJNA630029	SAMN14820585	2020-05-06	25.7233
Canis familiaris	PRJNA630029	SAMN14820582	2020-05-06	31.896
Canis familiaris	PRJNA630029	SAMN14820584	2020-05-06	26.5155
Canis familiaris	PRJNA630029	SAMN14820580	2020-05-06	29.8822
Canis familiaris	PRJNA630029	SAMN14820581	2020-05-06	30.4048
Canis familiaris	PRJNA610232	SAMN14279123	2020-05-14	18.9182
Canis familiaris	PRJEB23066	SAMEA5533140	2020-05-20	11.1481
Canis familiaris	PRJEB23066	SAMEA5533152	2020-05-20	9.39475
Canis familiaris	PRJEB23066	SAMEA5533154	2020-05-20	10.7118
Canis familiaris	PRJEB23066	SAMEA5533158	2020-05-20	10.6418
Canis familiaris	PRJEB23066	SAMEA5533142	2020-05-20	12.1813
Canis familiaris	PRJEB16012	SAMEA6862919	2020-05-29	28.0717
Canis familiaris	PRJEB16012	SAMEA6862928	2020-05-29	23.6523
Canis familiaris	PRJEB16012	SAMEA6862939	2020-05-29	12.8956
[truncated: 28,731 more rows]
