# Supplementary material for: Large-scale genomic analysis of the domestic dog informs biological discovery
Source: HighWire-hosted journal article supplement (doi:10.1101/gr.278569.123), 2024-06-01
Supplement: Supplemental_Table_S2.xlsx [file Supplemental_Table_S2.xlsx]

## Sheet: Sheet1
Supplemental_Table_S2: Dog10K sample information
Sample ID	Breed/Type	Dog Category	ISFS Group	Singleton Count	Variant Sites Count	FROH (Meadows et al 2022)	Country	Region
ACKR000001	Cocker Spaniel	Breed_Dogs	1	526	4723928	0.435148	United States	Americas
ACKR000002	Cocker Spaniel	Breed_Dogs	1	557	4708116	0.414365	United States	Americas
ACKR000003	Cocker Spaniel	Breed_Dogs	1	472	4745040	0.404403	United States	Americas
AESK000001	American Eskimo Dog	Breed_Dogs	1	1052	4779180	0.32484	United States	Americas
AESK000002	American Eskimo Dog	Breed_Dogs	1	436	4805208	0.207591	United States	Americas
AESK000003	American Eskimo Dog	Breed_Dogs	1	279	4815875	0.384121	United States	Americas
AESK000004	American Eskimo Dog	Breed_Dogs	1	423	4867162	0.380404	United States	Americas
AESK000005	American Eskimo Dog	Breed_Dogs	1	807	4821278	0.154996	United States	Americas
AESK000006	American Eskimo Dog	Breed_Dogs	1	345	4874152	0.330128	United States	Americas
AFFN000001	Affenpinscher	Breed_Dogs	1	618	4744270	0.426232	Germany	Europe
AFFN000003	Affenpinscher	Breed_Dogs	1	497	4747724	0.320585	Germany	Europe
AFFN000004	Affenpinscher	Breed_Dogs	1	466	4773655	0.332599	Germany	Europe
AFFN000005	Affenpinscher	Breed_Dogs	1	379	4778756	0.387611	Germany	Europe
AFFN000006	Affenpinscher	Breed_Dogs	1	492	4769427	0.323914	Germany	Europe
AFGH000001	Afghan Hound	Breed_Dogs	2	6461	5160422	0.312714	Afghanistan	Asia
AFOX000001	American Foxhound	Breed_Dogs	1	846	4742808	0.386447	United States	Americas
AFOX000002	American Foxhound	Breed_Dogs	1	510	4764838	0.211163	United States	Americas
AFOX000003	American Foxhound	Breed_Dogs	1	656	4774060	0.247468	United States	Americas
AFOX000004	American Foxhound	Breed_Dogs	1	823	4756443	0.245487	United States	Americas
AFOX000005	American Foxhound	Breed_Dogs	1	812	4760217	0.219741	United States	Americas
AFOX000006	American Foxhound	Breed_Dogs	1	495	4753486	0.275612	United States	Americas
AFOX000007	American Foxhound	Breed_Dogs	1	624	4777038	0.265128	United States	Americas
AHRT000001	American Hairless Terrier	Breed_Dogs	1	916	4777720	0.354336	United States	Americas
AHRT000002	American Hairless Terrier	Breed_Dogs	1	359	4817361	0.431826	United States	Americas
AHRT000003	American Hairless Terrier	Breed_Dogs	1	456	4772851	0.502388	United States	Americas
AHRT000004	American Hairless Terrier	Breed_Dogs	1	979	4792313	0.240505	United States	Americas
AHRT000005	American Hairless Terrier	Breed_Dogs	1	1696	4759701	0.173566	United States	Americas
AIRT000001	Airedale Terrier	Breed_Dogs	1	915	4766526	0.560623	United Kingdom	Europe
AKBH000001	Akbash	Breed_Dogs	2	6951	5017773	0.168172	Turkey	Asia
AKBH000002	Akbash	Breed_Dogs	2	7288	5025299	0.105776	Turkey	Asia
AKBH000003	Akbash	Breed_Dogs	2	5413	4977536	0.104351	Turkey	Asia
AKIN000001	Japanese Akita	Breed_Dogs	3	1245	5647907	0.418408	Japan	Asia
AKIN000002	Japanese Akita	Breed_Dogs	3	2102	5648899	0.318149	Japan	Asia
AKIT000001	American Akita	Breed_Dogs	3	2360	5604740	0.230241	Japan	Asia
AKIT000002	Japanese Akita	Breed_Dogs	3	1734	5657670	0.366814	Japan	Asia
AKIT000003	Japanese Akita	Breed_Dogs	3	1444	5682402	0.351204	Japan	Asia
AKIT000004	American Akita	Breed_Dogs	3	1658	5556204	0.234767	Japan	Asia
AKIT000005	American Akita	Breed_Dogs	3	2846	5584739	0.312406	Japan	Asia
AKIT000006	American Akita	Breed_Dogs	3	2704	5599455	0.253465	Japan	Asia
AKIT000007	American Akita	Breed_Dogs	3	1586	5579683	0.258507	Japan	Asia
AKIT000008	American Akita	Breed_Dogs	3	1774	5599103	0.333655	Japan	Asia
AKIT000009	American Akita	Breed_Dogs	3	2023	5624458	0.307241	Japan	Asia
ALDB000001	Alpine Dachsbracke	Breed_Dogs	1	461	4767085	0.325231	Austria	Europe
ALDB000002	Alpine Dachsbracke	Breed_Dogs	1	543	4760850	0.30023	Austria	Europe
ALDB000003	Alpine Dachsbracke	Breed_Dogs	1	399	4754645	0.332318	Austria	Europe
ALDB000004	Alpine Dachsbracke	Breed_Dogs	1	508	4777439	0.326888	Austria	Europe
ALDB000005	Alpine Dachsbracke	Breed_Dogs	1	398	4770584	0.261669	Austria	Europe
ALDB000006	Alpine Dachsbracke	Breed_Dogs	1	444	4783805	0.316741	Austria	Europe
ALDB000007	Alpine Dachsbracke	Breed_Dogs	1	353	4767365	0.332384	Austria	Europe
AMAL000001	Alaskan Malamute	Breed_Dogs	3	5784	5332200	0.288771	United States	Americas
AMAL000002	Alaskan Malamute	Breed_Dogs	3	4143	5343776	0.31106	United States	Americas
AMAL000003	Alaskan Malamute	Breed_Dogs	3	6349	5332375	0.225403	United States	Americas
AMBD000001	American Bulldog	Breed_Dogs	1	757	4752181	0.346033	United States	Americas
AMBD000002	American Bulldog	Breed_Dogs	1	642	4737462	0.385839	United States	Americas
AMBD000003	American Bulldog	Breed_Dogs	1	367	4729175	0.366355	United States	Americas
AMBD000005	American Bulldog	Breed_Dogs	1	560	4704350	0.28706	United States	Americas
AMBD000007	American Bulldog	Breed_Dogs	1	750	4768662	0.230185	United States	Americas
AMST000001	American Staffordshire Terrier	Breed_Dogs	1	525	4724550	0.331461	United States	Americas
AMST000002	American Staffordshire Terrier	Breed_Dogs	1	498	4754209	0.277094	United States	Americas
AMST000003	American Staffordshire Terrier	Breed_Dogs	1	507	4748427	0.358283	United States	Americas
AMST000005	American Staffordshire Terrier	Breed_Dogs	1	530	4737795	0.28405	United States	Americas
AMST000006	American Staffordshire Terrier	Breed_Dogs	1	555	4744528	0.322049	United States	Americas
AMWS000001	American Water Spaniel	Breed_Dogs	1	381	4757416	0.489526	United States	Americas
AMWS000002	American Water Spaniel	Breed_Dogs	1	458	4775685	0.345173	United States	Americas
AMWS000003	American Water Spaniel	Breed_Dogs	1	667	4759905	0.254741	United States	Americas
AMWS000004	American Water Spaniel	Breed_Dogs	1	375	4775594	0.336635	United States	Americas
AMWS000005	American Water Spaniel	Breed_Dogs	1	319	4774726	0.362565	United States	Americas
AMWS000006	American Water Spaniel	Breed_Dogs	1	560	4746478	0.244358	United States	Americas
ANAT000001	Anatolian Shepherd Dog	Breed_Dogs	2	5632	5037820	0.129755	United States	Americas
ANAT000003	Anatolian Shepherd Dog	Breed_Dogs	2	5130	5053529	0.13192	United States	Americas
ANAT000004	Anatolian Shepherd Dog	Breed_Dogs	2	6353	5046912	0.132605	United States	Americas
ANAT000005	Anatolian Shepherd Dog	Breed_Dogs	2	4416	5043516	0.349616	United States	Americas
ANAT000006	Anatolian Shepherd Dog	Breed_Dogs	2	4978	5056804	0.120282	United States	Americas
ANAT000007	Anatolian Shepherd Dog	Breed_Dogs	2	6392	5074619	0.132347	United States	Americas
ANFH000001	Anglo-Francais hound	Mixed/Other	1	1030	4494540	0.135503	France	Europe
ANFH000002	Anglo-Francais hound	Mixed/Other	1	937	4785293	0.2001	France	Europe
ANFH000003	Anglo-Francais hound	Mixed/Other	1	773	4792230	0.22049	France	Europe
ANFH000004	Anglo-Francais hound	Mixed/Other	1	1055	4756049	0.232458	France	Europe
APPZ000001	Appenzeller Sennenhund	Breed_Dogs	1	109	4735353	0.537244	Switzerland	Europe
APPZ000002	Appenzeller Sennenhund	Breed_Dogs	1	118	4737813	0.494562	Switzerland	Europe
APPZ000003	Appenzeller Sennenhund	Breed_Dogs	1	100	4756249	0.541566	Switzerland	Europe
APPZ000004	Appenzeller Sennenhund	Breed_Dogs	1	115	4740416	0.531833	Switzerland	Europe
APPZ000005	Appenzeller Sennenhund	Breed_Dogs	1	150	4764500	0.538767	Switzerland	Europe
APPZ000006	Appenzeller Sennenhund	Breed_Dogs	1	139	4751005	0.520067	Switzerland	Europe
APPZ000007	Appenzeller Sennenhund	Breed_Dogs	1	157	4748059	0.526252	Switzerland	Europe
APPZ000008	Appenzeller Sennenhund	Breed_Dogs	1	168	4738151	0.489289	Switzerland	Europe
APPZ000009	Appenzeller Sennenhund	Breed_Dogs	1	201	4764863	0.43301	Switzerland	Europe
APPZ000010	Appenzeller Sennenhund	Breed_Dogs	1	195	4739352	0.454415	Switzerland	Europe
APPZ000011	Appenzeller Sennenhund	Breed_Dogs	1	146	4761363	0.488751	Switzerland	Europe
APPZ000012	Appenzeller Sennenhund	Breed_Dogs	1	153	4746079	0.452075	Switzerland	Europe
APPZ000013	Appenzeller Sennenhund	Breed_Dogs	1	132	4751016	0.516705	Switzerland	Europe
APPZ000014	Appenzeller Sennenhund	Breed_Dogs	1	166	4742501	0.489083	Switzerland	Europe
ARHO000001	Artois Hound	Breed_Dogs	1	555	4776399	0.353939	France	Europe
ARHO000002	Artois Hound	Breed_Dogs	1	458	4794376	0.374295	France	Europe
ARIE000001	Ariegeois	Breed_Dogs	1	1536	4778779	0.166113	France	Europe
ARIP000001	Ariege Pointer	Breed_Dogs	1	192	4763912	0.293881	France	Europe
ARIP000002	Ariege Pointer	Breed_Dogs	1	262	4770503	0.289079	France	Europe
ARIP000003	Ariege Pointer	Breed_Dogs	1	103	4798061	0.3794	France	Europe
ARIP000004	Ariege Pointer	Breed_Dogs	1	191	4788307	0.264874	France	Europe
ARIP000005	Ariege Pointer	Breed_Dogs	1	267	4791059	0.305256	France	Europe
ARIP000006	Ariege Pointer	Breed_Dogs	1	65	4793291	0.285567	France	Europe
ASKT000001	Silky Terrier	Breed_Dogs	1	1017	4746658	0.200732	Australia	Oceania
ASKT000002	Silky Terrier	Breed_Dogs	1	1217	4744708	0.196933	Australia	Oceania
ASKT000003	Silky Terrier	Breed_Dogs	1	1266	4788555	0.19721	Australia	Oceania
AUCD000001	Australian Cattle Dog	Breed_Dogs	1	963	4782264	0.507148	Australia	Oceania
AUCD000002	Australian Cattle Dog	Breed_Dogs	1	1512	4772202	0.276059	Australia	Oceania
AUCD000003	Australian Cattle Dog	Breed_Dogs	1	1586	4787412	0.258074	Australia	Oceania
AUCD000004	Australian Cattle Dog	Breed_Dogs	1	1312	4783344	0.247048	Australia	Oceania
AUPO000001	Auvergne Pointer	Breed_Dogs	1	675	4757172	0.296153	France	Europe
AUPO000002	Auvergne Pointer	Breed_Dogs	1	419	4788427	0.352287	France	Europe
AUPO000003	Auvergne Pointer	Breed_Dogs	1	473	4789572	0.353257	France	Europe
AUPO000004	Auvergne Pointer	Breed_Dogs	1	865	4757344	0.276962	France	Europe
AUPO000005	Auvergne Pointer	Breed_Dogs	1	966	4721410	0.141268	France	Europe
AUPO000006	Auvergne Pointer	Breed_Dogs	1	536	4759791	0.277603	France	Europe
AUSK000001	Australian Kelpie	Breed_Dogs	1	1317	4798333	0.328597	Australia	Oceania
AUSK000002	Australian Kelpie	Breed_Dogs	1	1452	4787614	0.291613	Australia	Oceania
AUSK000003	Australian Kelpie	Breed_Dogs	1	1182	4782369	0.244477	Australia	Oceania
AUSK000004	Australian Kelpie	Breed_Dogs	1	1254	4787439	0.192915	Australia	Oceania
AUSK000005	Australian Kelpie	Breed_Dogs	1	1254	4779580	0.305333	Australia	Oceania
AUSK000006	Australian Kelpie	Breed_Dogs	1	1309	4752285	0.231104	Australia	Oceania
AUSS000001	Australian Shepherd	Breed_Dogs	1	1151	4720591	0.36884	United States	Americas
AUSS000002	Australian Shepherd	Breed_Dogs	1	1360	4755129	0.200699	United States	Americas
AUSS000003	Australian Shepherd	Breed_Dogs	1	1295	4744175	0.273924	United States	Americas
AUST000001	Australian Terrier	Breed_Dogs	1	724	4761193	0.324751	Australia	Oceania
AUST000002	Australian Terrier	Breed_Dogs	1	700	4772479	0.308455	Australia	Oceania
AUST000003	Australian Terrier	Breed_Dogs	1	650	4804523	0.281995	Australia	Oceania
AUST000004	Australian Terrier	Breed_Dogs	1	781	4787163	0.298708	Australia	Oceania
AUST000005	Australian Terrier	Breed_Dogs	1	695	4767238	0.290046	Australia	Oceania
BAND000001	Bandog	Mixed/Other	1	983	4702253	0.178689	United Kingdom	Europe
BANO000001	Basset Artesien Normand	Breed_Dogs	1	446	4796520	0.395419	France	Europe
BANO000002	Basset Artesien Normand	Breed_Dogs	1	311	4798038	0.459485	France	Europe
BANO000003	Basset Artesien Normand	Breed_Dogs	1	392	4780568	0.350587	France	Europe
BANO000004	Basset Artesien Normand	Breed_Dogs	1	800	4777795	0.203873	France	Europe
BANO000005	Basset Artesien Normand	Breed_Dogs	1	359	4802808	0.453775	France	Europe
BANO000006	Basset Artesien Normand	Breed_Dogs	1	402	4782023	0.419035	France	Europe
BASS000001	Basset Hound	Breed_Dogs	1	461	4769572	0.392692	France	Europe
BASS000002	Basset Hound	Breed_Dogs	1	443	4765394	0.354342	France	Europe
BASS000003	Basset Hound	Breed_Dogs	1	529	4772672	0.390921	France	Europe
BASS000004	Basset Hound	Breed_Dogs	1	577	4764164	0.305439	France	Europe
BASS000005	Basset Hound	Breed_Dogs	1	419	4795251	0.367366	France	Europe
BASS000006	Basset Hound	Breed_Dogs	1	635	4755480	0.324853	France	Europe
BASS000007	Basset Hound	Breed_Dogs	1	425	4755363	0.514066	France	Europe
BBLS000001	White Swiss Shepherd Dog	Breed_Dogs	1	220	3471963	0.352326	Switzerland	Europe
BBLS000002	White Swiss Shepherd Dog	Breed_Dogs	1	679	3481752	0.357946	Switzerland	Europe
BBLS000003	White Swiss Shepherd Dog	Breed_Dogs	1	222	3502131	0.413053	Switzerland	Europe
BEAU000001	Beauceron	Breed_Dogs	1	1045	4655590	0.294708	France	Europe
BEAU000002	Belgian Tervuren	Breed_Dogs	1	437	4752290	0.337788	Belgium	Europe
BEAU000003	Beauceron	Breed_Dogs	1	1069	4670007	0.236074	France	Europe
BEAU000004	Beauceron	Breed_Dogs	1	1070	4648166	0.258623	France	Europe
BEAU000005	German shepherd mix	Mixed/Other	1	958	4220249	0.138794	Germany	Europe
BEAU000006	Beauceron	Breed_Dogs	1	1118	4691935	0.274698	France	Europe
BEAU000007	German shepherd mix	Mixed/Other	1	721	4414177	0.214027	Germany	Europe
BEDT000001	Bedlington Terrier	Breed_Dogs	1	373	4737620	0.382261	United Kingdom	Europe
BEDT000003	Bedlington Terrier	Breed_Dogs	1	345	4735840	0.453495	United Kingdom	Europe
BEDT000004	Bedlington Terrier	Breed_Dogs	1	228	4756811	0.439099	United Kingdom	Europe
BEDT000005	Bedlington Terrier	Breed_Dogs	1	266	4744717	0.49497	United Kingdom	Europe
BEDT000006	Bedlington Terrier	Breed_Dogs	1	327	4734637	0.463672	United Kingdom	Europe
BEDT000007	Bedlington Terrier	Breed_Dogs	1	385	4745347	0.45096	United Kingdom	Europe
BEDT000008	Bedlington Terrier	Breed_Dogs	1	377	4739192	0.52127	United Kingdom	Europe
BELS000001	Belgian Sheepdog	Breed_Dogs	1	376	4732721	0.334528	Belgium	Europe
BELS000002	Belgian Sheepdog	Breed_Dogs	1	490	4720716	0.315877	Belgium	Europe
BELS000003	Belgian Sheepdog	Breed_Dogs	1	292	4729960	0.398972	Belgium	Europe
BERG000001	Bergamasco Sheepdog	Breed_Dogs	1	784	4558494	0.248955	Italy	Europe
BERG000002	Bergamasco Sheepdog	Breed_Dogs	1	337	4583016	0.272589	Italy	Europe
BERG000003	Bergamasco Sheepdog	Breed_Dogs	1	908	4563891	0.204258	Italy	Europe
BERG000004	Bergamasco Sheepdog	Breed_Dogs	1	778	4620982	0.273341	Italy	Europe
BERG000005	Bergamasco Sheepdog	Breed_Dogs	1	1155	4656459	0.234605	Italy	Europe
BERG000006	Bergamasco Sheepdog	Breed_Dogs	1	1027	4622130	0.186233	Italy	Europe
BFDB000001	Basset Fauve de Bretagne	Breed_Dogs	1	953	4797422	0.251786	France	Europe
BFDB000002	Basset Fauve de Bretagne	Breed_Dogs	1	1022	4800263	0.212418	France	Europe
BFDB000003	Basset Fauve de Bretagne	Breed_Dogs	1	1076	4791640	0.212794	France	Europe
BFDB000005	Basset Fauve de Bretagne	Breed_Dogs	1	1185	4822268	0.236754	France	Europe
BFDB000006	Basset Fauve de Bretagne	Breed_Dogs	1	964	4820333	0.377938	France	Europe
BGBA000001	Blue Gascony Griffon	Breed_Dogs	1	1442	4769716	0.142141	France	Europe
BGGR000001	Blue Gascony Griffon	Breed_Dogs	1	814	4765316	0.151856	France	Europe
BGGR000002	Blue Gascony Griffon	Breed_Dogs	1	1625	4765125	0.179147	France	Europe
BHSP000001	Bohemian Shepherd	Breed_Dogs	1	132	3589359	0.518863	Czech Republic	Europe
BHSP000002	Bohemian Shepherd	Breed_Dogs	1	149	3623978	0.50939	Czech Republic	Europe
BHSP000003	Bohemian Shepherd	Breed_Dogs	1	114	3493879	0.48401	Czech Republic	Europe
BHSP000004	Bohemian Shepherd	Breed_Dogs	1	137	3593493	0.535109	Czech Republic	Europe
BHSP000005	Bohemian Shepherd	Breed_Dogs	1	155	3570581	0.537614	Czech Republic	Europe
BHSP000006	Bohemian Shepherd	Breed_Dogs	1	161	3538802	0.4691	Czech Republic	Europe
BICH000001	Bichon Frise	Breed_Dogs	1	713	4793514	0.220676	Spain	Europe
BICH000002	Bichon Frise	Breed_Dogs	1	979	4793799	0.253462	Spain	Europe
BICH000003	Bichon Frise	Breed_Dogs	1	831	4769864	0.360875	Spain	Europe
BICH000004	Bichon Frise	Breed_Dogs	1	508	4783567	0.332418	Spain	Europe
BICH000005	Bichon Frise	Breed_Dogs	1	494	4816699	0.350786	Spain	Europe
BICH000006	Havanese	Breed_Dogs	1	1384	4791414	0.154224	Cuba	Americas
BICH000007	Bichon Frise	Breed_Dogs	1	866	4779659	0.209786	Spain	Europe
BILL000001	Billy	Breed_Dogs	1	428	4762893	0.239338	France	Europe
BILL000002	Billy	Breed_Dogs	1	317	4781576	0.274476	France	Europe
BLDH000001	Bloodhound	Breed_Dogs	1	507	4758400	0.471955	France	Europe
BLDH000002	Bloodhound	Breed_Dogs	1	481	4732685	0.434885	France	Europe
BLDH000003	Bloodhound	Breed_Dogs	1	507	4755762	0.427952	France	Europe
BLDH000004	Bloodhound	Breed_Dogs	1	491	4767295	0.461657	France	Europe
BLNK000001	Russian Tsvetnaya Bolonka	Breed_Dogs	1	935	4833073	0.270376	Russia	Europe
BLNK000002	Russian Tsvetnaya Bolonka	Breed_Dogs	1	785	4846526	0.175769	Russia	Europe
BLNK000003	Russian Tsvetnaya Bolonka	Breed_Dogs	1	1005	4861077	0.193192	Russia	Europe
BLNK000004	Russian Tsvetnaya Bolonka	Breed_Dogs	1	847	4842982	0.149772	Russia	Europe
BLNK000005	Russian Tsvetnaya Bolonka	Breed_Dogs	1	1191	4859703	0.199509	Russia	Europe
BLNK000006	Russian Tsvetnaya Bolonka	Breed_Dogs	1	1165	4844847	0.218467	Russia	Europe
BLPS000001	Blue Picardy Spaniel	Breed_Dogs	1	293	4702836	0.348597	France	Europe
BLPS000002	Blue Picardy Spaniel	Breed_Dogs	1	1253	4745772	0.223401	France	Europe
BLPS000003	Blue Picardy Spaniel	Breed_Dogs	1	253	4743906	0.36466	France	Europe
BLUE000001	Bluetick Coonhound	Breed_Dogs	1	1626	4756007	0.249681	United States	Americas
BLUE000002	Bluetick Coonhound	Breed_Dogs	1	1564	4747027	0.2113	United States	Americas
BMAL000001	Belgian Malinois	Breed_Dogs	1	723	4587775	0.209853	Belgium	Europe
BMAL000002	Belgian Malinois	Breed_Dogs	1	601	4613293	0.298447	Belgium	Europe
BMAL000003	Belgian Malinois	Breed_Dogs	1	720	4573853	0.216389	Belgium	Europe
BMAL000004	Belgian Malinois	Breed_Dogs	1	686	4585068	0.26002	Belgium	Europe
BMSH000001	Bavarian Mountain Scent Hound	Breed_Dogs	1	754	4802426	0.294527	Germany	Europe
BMSH000002	Bavarian Mountain Scent Hound	Breed_Dogs	1	749	4783345	0.225275	Germany	Europe
BMSH000003	Bavarian Mountain Scent Hound	Breed_Dogs	1	815	4784603	0.310945	Germany	Europe
BMSH000004	Bavarian Mountain Scent Hound	Breed_Dogs	1	697	4760556	0.262775	Germany	Europe
BMSH000005	Bavarian Mountain Scent Hound	Breed_Dogs	1	660	4773107	0.387978	Germany	Europe
BMSH000006	Bavarian Mountain Scent Hound	Breed_Dogs	1	935	4826222	0.231946	Germany	Europe
BODA000001	Bouvier des Ardennes	Breed_Dogs	1	1507	4469297	0.238519	Belgium	Europe
BOER000001	Boerboel	Breed_Dogs	1	771	4730971	0.313612	South Africa	Africa
BOER000002	Boerboel	Breed_Dogs	1	803	4746989	0.219643	South Africa	Africa
BOER000003	Boerboel	Breed_Dogs	1	775	4716293	0.228148	South Africa	Africa
BOER000004	Boerboel	Breed_Dogs	1	855	4744679	0.205025	South Africa	Africa
BOLO000002	Bolognese	Breed_Dogs	1	937	4802326	0.283387	Italy	Europe
BOLO000003	Bolognese	Breed_Dogs	1	1049	4797224	0.232513	Italy	Europe
BOLO000004	Bolognese	Breed_Dogs	1	1282	4800292	0.251656	Italy	Europe
BOLO000005	Bolognese	Breed_Dogs	1	1406	4822526	0.160785	Italy	Europe
BOLO000006	Bolognese	Breed_Dogs	1	994	4804206	0.167856	Italy	Europe
BOPD000001	Bourbonnais Pointing Dog	Breed_Dogs	1	235	4758391	0.252786	France	Europe
BOPD000002	Bourbonnais Pointing Dog	Breed_Dogs	1	266	4771826	0.243049	France	Europe
BOPD000003	Bourbonnais Pointing Dog	Breed_Dogs	1	379	4723994	0.299252	France	Europe
BOPD000004	Bourbonnais Pointing Dog	Breed_Dogs	1	115	4753158	0.266963	France	Europe
BOPD000006	Bourbonnais Pointing Dog	Breed_Dogs	1	262	4753315	0.278293	France	Europe
BOPD000007	Bourbonnais Pointing Dog	Breed_Dogs	1	560	4769989	0.314967	France	Europe
BOPD000008	Bourbonnais Pointing Dog	Breed_Dogs	1	324	4754666	0.338275	France	Europe
BOST000001	Boston Terrier	Breed_Dogs	1	751	4742209	0.30408	United States	Americas
BOST000002	Boston Terrier	Breed_Dogs	1	802	4734099	0.302163	United States	Americas
BOST000003	Boston Terrier	Breed_Dogs	1	854	4770849	0.319668	United States	Americas
BOUV000001	Bouvier des Flandres	Breed_Dogs	1	360	4735459	0.391796	Belgium	Europe
BOUV000002	Bouvier des Flandres	Breed_Dogs	1	507	4725235	0.282588	Belgium	Europe
BOXR000001	Boxer	Breed_Dogs	1	383	4734549	0.601249	Germany	Europe
BOXR000002	Boxer	Breed_Dogs	1	404	4732040	0.473205	Germany	Europe
BOXR000003	Boxer	Breed_Dogs	1	289	4736853	0.490984	Germany	Europe
BOXR000004	Boxer	Breed_Dogs	1	446	4729558	0.46846	Germany	Europe
BOXR000005	Boxer	Breed_Dogs	1	310	4753293	0.508248	Germany	Europe
BOYK000001	Boykin Spaniel	Breed_Dogs	1	501	4767321	0.270419	United States	Americas
BOYK000002	Boykin Spaniel	Breed_Dogs	1	397	4785456	0.335751	United States	Americas
BOYK000003	Boykin Spaniel	Breed_Dogs	1	418	4795533	0.344552	United States	Americas
BOYK000004	Boykin Spaniel	Breed_Dogs	1	555	4782983	0.325297	United States	Americas
BOYK000005	Boykin Spaniel	Breed_Dogs	1	502	4797165	0.312419	United States	Americas
BRAC000001	Bracco Italiano	Breed_Dogs	1	614	4772106	0.338784	Italy	Europe
BRAC000002	Bracco Italiano	Breed_Dogs	1	319	4760973	0.279708	Italy	Europe
BRAC000003	Bracco Italiano	Breed_Dogs	1	314	4804834	0.303315	Italy	Europe
BRAC000004	Bracco Italiano	Breed_Dogs	1	301	4783568	0.359678	Italy	Europe
BRAC000005	Bracco Italiano	Breed_Dogs	1	531	4770697	0.287951	Italy	Europe
BRAC000006	Bracco Italiano	Breed_Dogs	1	558	4795491	0.279171	Italy	Europe
BRBT000001	Barbet	Breed_Dogs	1	301	4687629	0.26815	France	Europe
BRBT000002	Barbet	Breed_Dogs	1	779	4748267	0.218906	France	Europe
BRBT000003	Barbet	Breed_Dogs	1	286	4704427	0.333235	France	Europe
BRBT000004	Barbet	Breed_Dogs	1	882	4753793	0.2018	France	Europe
BRBT000005	Barbet	Breed_Dogs	1	445	4753094	0.222863	France	Europe
BRBT000006	Barbet	Breed_Dogs	1	529	4750163	0.300842	France	Europe
BRFR000001	Braques Francais	Breed_Dogs	1	643	4758129	0.223029	France	Europe
BRFR000002	Braques Francais	Breed_Dogs	1	335	4744343	0.325225	France	Europe
BRFR000003	Braques Francais	Breed_Dogs	1	619	4779400	0.234475	France	Europe
BRFR000004	Braques Francais	Breed_Dogs	1	467	4764756	0.206921	France	Europe
BRFR000005	Braques Francais	Breed_Dogs	1	717	4803913	0.204022	France	Europe
BRGV000001	Briquet Griffon Vendeen	Breed_Dogs	1	877	4799739	0.265898	France	Europe
BRGV000002	Briquet Griffon Vendeen	Breed_Dogs	1	1082	4807608	0.193738	France	Europe
BRHM000001	Broholmer	Breed_Dogs	1	157	4651666	0.41715	Denmark	Europe
BRHM000002	Broholmer	Breed_Dogs	1	174	4677071	0.419318	Denmark	Europe
BRHM000003	Broholmer	Breed_Dogs	1	238	4674532	0.366634	Denmark	Europe
BRHM000004	Broholmer	Breed_Dogs	1	211	4645060	0.43842	Denmark	Europe
BRHM000005	Broholmer	Breed_Dogs	1	223	4687541	0.39873	Denmark	Europe
BRHM000006	Broholmer	Breed_Dogs	1	188	4697346	0.482983	Denmark	Europe
BRIA000001	Briard	Breed_Dogs	1	844	4700727	0.345242	France	Europe
BRIA000002	Briard	Breed_Dogs	1	630	4707491	0.375696	France	Europe
BRIA000003	Briard	Breed_Dogs	1	648	4717673	0.369876	France	Europe
BRIA000004	Briard	Breed_Dogs	1	476	4672784	0.39766	France	Europe
BRIA000005	Briard	Breed_Dogs	1	509	4696504	0.381175	France	Europe
BRIA000006	Briard	Breed_Dogs	1	565	4684516	0.35247	France	Europe
BRIT000001	Brittany	Breed_Dogs	1	733	4776395	0.276815	France	Europe
BRIT000002	Brittany	Breed_Dogs	1	708	4752332	0.290848	France	Europe
BRIT000003	Brittany	Breed_Dogs	1	679	4763891	0.27803	France	Europe
BRIT000004	Brittany	Breed_Dogs	1	544	4751418	0.279363	France	Europe
BRIT000005	Brittany	Breed_Dogs	1	603	4777870	0.280217	France	Europe
BRIT000006	Brittany	Breed_Dogs	1	481	4759784	0.321021	France	Europe
BRIT000007	Brittany	Breed_Dogs	1	576	4750609	0.26818	France	Europe
BRIT000008	Brittany	Breed_Dogs	1	922	4781924	0.20934	France	Europe
BRJH000001	Bruno Jura Hound	Breed_Dogs	1	698	4804177	0.296433	Switzerland	Europe
BRJH000002	Bloodhound	Breed_Dogs	1	810	4776044	0.243589	France	Europe
BRJH000003	Bruno Jura Hound	Breed_Dogs	1	1056	4773694	0.179958	Switzerland	Europe
BRJH000004	Bruno Jura Hound	Breed_Dogs	1	543	4766960	0.225446	Switzerland	Europe
BRJH000005	Bruno Jura Hound	Breed_Dogs	1	575	4778752	0.254535	Switzerland	Europe
BRJH000006	Bruno Jura Hound	Breed_Dogs	1	507	4784841	0.266075	Switzerland	Europe
BRMD000001	Bernese Mountain Dog	Breed_Dogs	1	397	4730589	0.341036	Switzerland	Europe
BRMD000002	Bernese Mountain Dog	Breed_Dogs	1	392	4734693	0.384074	Switzerland	Europe
BRMD000003	Bernese Mountain Dog	Breed_Dogs	1	243	4744083	0.428038	Switzerland	Europe
BRMD000004	Bernese Mountain Dog	Breed_Dogs	1	377	4707642	0.401165	Switzerland	Europe
BRMD000005	Bernese Mountain Dog	Breed_Dogs	1	348	4736471	0.405729	Switzerland	Europe
BRMD000006	Bernese Mountain Dog	Breed_Dogs	1	315	4727671	0.386324	Switzerland	Europe
BRMD000007	Bernese Mountain Dog	Breed_Dogs	1	276	4730970	0.418685	Switzerland	Europe
BRMD000008	Bernese Mountain Dog	Breed_Dogs	1	288	4752208	0.40057	Switzerland	Europe
BRMD000009	Bernese Mountain Dog	Breed_Dogs	1	292	4714737	0.42049	Switzerland	Europe
BRMD000010	Bernese Mountain Dog	Breed_Dogs	1	471	4735880	0.341195	Switzerland	Europe
BRTR000001	Black Russian Terrier	Breed_Dogs	1	528	4757643	0.275795	Russia	Europe
BRTR000002	Black Russian Terrier	Breed_Dogs	1	388	4765392	0.311536	Russia	Europe
BRTR000003	Black Russian Terrier	Breed_Dogs	1	575	4782506	0.284628	Russia	Europe
BRTR000004	Black Russian Terrier	Breed_Dogs	1	583	4755363	0.254565	Russia	Europe
BRTR000005	Black Russian Terrier	Breed_Dogs	1	447	4761152	0.279975	Russia	Europe
BRUS000001	Brussels Griffon	Breed_Dogs	1	381	4785177	0.39655	Belgium	Europe
BRUS000002	Brussels Griffon	Breed_Dogs	1	408	4774744	0.295041	Belgium	Europe
BRUS000003	Brussels Griffon	Breed_Dogs	1	484	4781625	0.324699	Belgium	Europe
BRUS000004	Brussels Griffon	Breed_Dogs	1	374	4746019	0.362583	Belgium	Europe
BRUS000005	Brussels Griffon	Breed_Dogs	1	289	4745279	0.411767	Belgium	Europe
BRUS000006	Brussels Griffon	Breed_Dogs	1	456	4773121	0.434157	Belgium	Europe
BRUS000007	Brussels Griffon	Breed_Dogs	1	450	4763763	0.355216	Belgium	Europe
BRZT000001	Brazilian Terrier	Breed_Dogs	1	637	4736145	0.324725	Brazil	Americas
BRZT000002	Brazilian Terrier	Breed_Dogs	1	1150	4737210	0.247042	Brazil	Americas
BRZT000003	Brazilian Terrier	Breed_Dogs	1	639	4738617	0.275689	Brazil	Americas
BRZT000004	Brazilian Terrier	Breed_Dogs	1	1404	4769356	0.175095	Brazil	Americas
BRZT000005	Brazilian Terrier	Breed_Dogs	1	421	4755288	0.420163	Brazil	Americas
BRZT000006	Brazilian Terrier	Breed_Dogs	1	878	4745427	0.348929	Brazil	Americas
BTAN000001	Black and Tan Coonhound	Breed_Dogs	1	1697	4726393	0.361058	United States	Americas
BULD000001	French Bulldog	Breed_Dogs	1	642	4735004	0.321004	France	Europe
BULD000002	English Bulldog	Breed_Dogs	1	456	4758171	0.467425	United Kingdom	Europe
BULD000003	English Bulldog	Breed_Dogs	1	428	4755130	0.438202	United Kingdom	Europe
BULM000001	Bullmastiff	Breed_Dogs	1	369	4742159	0.330419	United Kingdom	Europe
BULM000002	Bullmastiff	Breed_Dogs	1	336	4739166	0.411134	United Kingdom	Europe
BULM000003	Bullmastiff	Breed_Dogs	1	192	4746022	0.445084	United Kingdom	Europe
BULM000004	Bullmastiff	Breed_Dogs	1	187	4723512	0.374468	United Kingdom	Europe
BULM000005	Bullmastiff	Breed_Dogs	1	342	4741184	0.41562	United Kingdom	Europe
BULM000006	Bullmastiff	Breed_Dogs	1	355	4731384	0.367502	United Kingdom	Europe
BULT000001	Bull Terrier	Breed_Dogs	1	230	4721949	0.555549	United Kingdom	Europe
BULT000002	Bull Terrier	Breed_Dogs	1	306	4720669	0.585727	United Kingdom	Europe
BULT000003	Bull Terrier	Breed_Dogs	1	255	4720175	0.573309	United Kingdom	Europe
BULT000004	Bull Terrier	Breed_Dogs	1	291	4710027	0.548372	United Kingdom	Europe
BWRT000001	Biewer Terrier	Breed_Dogs	1	496	4781352	0.280605	Germany	Europe
BWRT000002	Biewer Terrier	Breed_Dogs	1	346	4782970	0.273373	Germany	Europe
BWRT000003	Biewer Terrier	Breed_Dogs	1	545	4759117	0.299617	Germany	Europe
BWRT000004	Biewer Terrier	Breed_Dogs	1	615	4767716	0.285404	Germany	Europe
BWRT000005	Biewer Terrier	Breed_Dogs	1	530	4763137	0.248693	Germany	Europe
BWRT000006	Biewer Terrier	Breed_Dogs	1	475	4762099	0.317049	Germany	Europe
CAAN000001	Canaan Dog	Breed_Dogs	2	10690	4952464	0.148351	Israel	Asia
CAAN000002	Canaan Dog	Breed_Dogs	2	14427	5088874	0.123681	Israel	Asia
CAIR000001	Cairn Terrier	Breed_Dogs	1	1187	4766028	0.342709	United Kingdom	Europe
CAIR000002	Cairn Terrier	Breed_Dogs	1	835	4778096	0.328792	United Kingdom	Europe
CAIR000003	Cairn Terrier	Breed_Dogs	1	907	4750319	0.30197	United Kingdom	Europe
CAIR000004	Cairn Terrier	Breed_Dogs	1	861	4779966	0.302258	United Kingdom	Europe
CAIR000005	Cairn Terrier	Breed_Dogs	1	971	4781202	0.276622	United Kingdom	Europe
CANM000001	Dogo Canario	Breed_Dogs	1	602	4718048	0.256065	Spain	Europe
CANM000002	Dogo Canario	Breed_Dogs	1	583	4684402	0.311848	Spain	Europe
CANM000003	Dogo Canario	Breed_Dogs	1	1050	4733496	0.205186	Spain	Europe
CANM000004	Dogo Canario	Breed_Dogs	1	411	4723633	0.358629	Spain	Europe
CANM000005	Dogo Canario	Breed_Dogs	1	672	4688080	0.300125	Spain	Europe
CANM000006	Dogo Canario	Breed_Dogs	1	624	4673806	0.237492	Spain	Europe
CARD000001	Cardigan Welsh Corgi	Breed_Dogs	1	699	4735632	0.355946	United Kingdom	Europe
CARD000002	Schipperke	Breed_Dogs	1	718	4801175	0.397878	Belgium	Europe
CARD000003	Cardigan Welsh Corgi	Breed_Dogs	1	868	4744428	0.283962	United Kingdom	Europe
CARD000004	Cardigan Welsh Corgi	Breed_Dogs	1	357	4734720	0.320108	United Kingdom	Europe
CARD000005	Cardigan Welsh Corgi	Breed_Dogs	1	445	4739103	0.314122	United Kingdom	Europe
CARO000001	Carolina Dog	Mixed/Other	2	2851	5144110	0.0849869	United States	Americas
CARO000002	Carolina Dog	Mixed/Other	1	1126	4527424	0.353027	United States	Americas
CARO000003	Carolina Dog	Mixed/Other	2	4784	4665962	0.227453	United States	Americas
CASD000001	Central Asian Shepherd Dog	Breed_Dogs	2	10088	5124541	0.0902289	Afghanistan	Asia
CASD000002	Central Asian Shepherd Dog	Breed_Dogs	2	8753	5134759	0.122547	Afghanistan	Asia
CASD000003	Central Asian Shepherd Dog	Breed_Dogs	2	8303	5087588	0.127319	Afghanistan	Asia
CAUC000001	Caucasian Ovcharka	Breed_Dogs	2	6187	4913116	0.108923	Armenia	Asia
CAUC000002	Caucasian Ovcharka	Breed_Dogs	2	5590	4992738	0.154156	Armenia	Asia
CAUC000003	Caucasian Ovcharka	Breed_Dogs	2	5256	4950996	0.13717	Armenia	Asia
CAUC000004	Caucasian Ovcharka	Breed_Dogs	2	5127	5062684	0.130454	Armenia	Asia
CCRT000001	Curly-Coated Retriever	Breed_Dogs	1	542	4757833	0.387421	United Kingdom	Europe
CCRT000002	Curly-Coated Retriever	Breed_Dogs	1	457	4747066	0.424909	United Kingdom	Europe
CCRT000003	Curly-Coated Retriever	Breed_Dogs	1	542	4748951	0.389992	United Kingdom	Europe
CCRT000004	Curly-Coated Retriever	Breed_Dogs	1	528	4751696	0.394456	United Kingdom	Europe
CFOU000001	Cesky Fousek	Breed_Dogs	1	700	4749885	0.236339	Czech Republic	Europe
CFOU000002	Cesky Fousek	Breed_Dogs	1	341	4760848	0.213452	Czech Republic	Europe
CFOU000003	Cesky Fousek	Breed_Dogs	1	386	4785211	0.246082	Czech Republic	Europe
CFOU000004	Cesky Fousek	Breed_Dogs	1	697	4783339	0.268911	Czech Republic	Europe
CHBR000001	Chesapeake Bay Retriever	Breed_Dogs	1	829	4738715	0.327668	United States	Americas
CHBR000002	Chesapeake Bay Retriever	Breed_Dogs	1	854	4714383	0.273238	United States	Americas
CHBR000003	Chesapeake Bay Retriever	Breed_Dogs	1	987	4733922	0.235717	United States	Americas
CHBR000004	Chesapeake Bay Retriever	Breed_Dogs	1	900	4750730	0.266621	United States	Americas
CHBR000005	Chesapeake Bay Retriever	Breed_Dogs	1	907	4717907	0.251527	United States	Americas
CHIH000005	Chihuahua	Breed_Dogs	1	3618	4811480	0.20872	Mexico	Americas
CHIH000006	Chihuahua	Breed_Dogs	1	3809	4849695	0.209024	Mexico	Americas
CHIN000001	Japanese Chin	Breed_Dogs	2	1035	5066715	0.351238	Japan	Asia
CHIN000003	Japanese Chin	Breed_Dogs	2	1279	5048158	0.300896	Japan	Asia
CHIN000004	Japanese Chin	Breed_Dogs	2	965	5015996	0.408365	Japan	Asia
CHIN000005	Japanese Chin	Breed_Dogs	2	912	5039954	0.348075	Japan	Asia
CHIN000006	Japanese Chin	Breed_Dogs	2	705	5089984	0.428578	Japan	Asia
CHIN000007	Japanese Chin	Breed_Dogs	2	954	5044993	0.354988	Japan	Asia
CHOW000001	Chow Chow	Breed_Dogs	3	3917	5715213	0.278386	China	Asia
CHOW000002	Chow Chow	Breed_Dogs	3	3834	5727809	0.330826	China	Asia
CHOW000003	Chow Chow	Breed_Dogs	3	3950	5712232	0.208374	China	Asia
CHOW000004	Chow Chow	Breed_Dogs	3	4389	5759143	0.257578	China	Asia
CIRN000001	Cirneco dell'Etna	Breed_Dogs	1	1535	4786270	0.242034	Italy	Europe
CIRN000002	Cirneco dell'Etna	Breed_Dogs	1	937	4792134	0.379886	Italy	Europe
CIRN000003	Cirneco dell'Etna	Breed_Dogs	1	1933	4786610	0.228988	Italy	Europe
CIRN000004	Cirneco dell'Etna	Breed_Dogs	1	919	4808815	0.32513	Italy	Europe
CIRN000005	Cirneco dell'Etna	Breed_Dogs	1	892	4762936	0.333955	Italy	Europe
CIRN000006	Cirneco dell'Etna	Breed_Dogs	1	1493	4763438	0.219056	Italy	Europe
CKCS000001	Cavalier King Charles Spaniel	Breed_Dogs	1	374	4751647	0.413399	United Kingdom	Europe
CKCS000002	Cavalier King Charles Spaniel	Breed_Dogs	1	321	4757123	0.473335	United Kingdom	Europe
CKCS000003	Cavalier King Charles Spaniel	Breed_Dogs	1	386	4731545	0.409622	United Kingdom	Europe
CKCS000004	Cavalier King Charles Spaniel	Breed_Dogs	1	368	4758040	0.424497	United Kingdom	Europe
CKCS000005	Cavalier King Charles Spaniel	Breed_Dogs	1	378	4762994	0.426636	United Kingdom	Europe
CLSP000001	Clumber Spaniel	Breed_Dogs	1	341	4756541	0.458277	United Kingdom	Europe
CLSP000002	Clumber Spaniel	Breed_Dogs	1	316	4756001	0.486608	United Kingdom	Europe
CLSP000003	Clumber Spaniel	Breed_Dogs	1	210	4746514	0.522054	United Kingdom	Europe
CLSP000004	Clumber Spaniel	Breed_Dogs	1	307	4750885	0.510258	United Kingdom	Europe
CLSP000005	Clumber Spaniel	Breed_Dogs	1	324	4786018	0.486159	United Kingdom	Europe
CLUPAZ000001	Azerbaijan	Wolf	4	42521	7138283	0.0590612	Azerbaijan	Asia
CLUPCN000001	China	Wolf	4	53014	7062218	0.0559441	China	Asia
CLUPCN000002	China	Wolf	4	25769	7175130	0.152361	China	Asia
CLUPCN000003	China	Wolf	4	25022	7174168	0.136398	China	Asia
CLUPCN000004	China	Wolf	4	14930	7128709	0.0872187	China	Asia
CLUPCN000005	China	Wolf	4	16016	7111918	0.0673188	China	Asia
CLUPCN000006	China	Wolf	4	34357	7099288	0.0537961	China	Asia
CLUPCN000007	China	Wolf	4	35040	7121938	0.0515956	China	Asia
CLUPCN000009	China	Wolf	4	33042	7117069	0.0326816	China	Asia
CLUPCN000010	China	Wolf	4	32429	7113713	0.0275456	China	Asia
CLUPEA000001	Eurasia	Wolf	4	68495	7112926	0.334749	NA	NA
CLUPEU000002	Europe	Wolf	4	23869	7114870	0.272782	NA	NA
CLUPGR000001	Greece	Wolf	4	5937	7105081	0.0982905	Greece	Europe
CLUPGR000002	Greece	Wolf	4	14292	7071079	0.125423	Greece	Europe
CLUPGR000003	Greece	Wolf	4	9724	7093702	0.105478	Greece	Europe
CLUPGR000004	Greece	Wolf	4	11286	7063372	0.119281	Greece	Europe
CLUPGR000005	Greece	Wolf	4	8062	7092352	0.116479	Greece	Europe
CLUPGR000006	Greece	Wolf	4	10306	7102149	0.0972613	Greece	Europe
CLUPGR000007	Greece	Wolf	4	4881	7107256	0.123545	Greece	Europe
CLUPGR000008	Greece	Wolf	4	12129	7069334	0.131313	Greece	Europe
CLUPGR000009	Greece	Wolf	4	9936	7116040	0.0953639	Greece	Europe
CLUPGR000010	Greece	Wolf	4	8081	7063546	0.113534	Greece	Europe
CLUPGR000011	Greece	Wolf	4	5398	7097280	0.132557	Greece	Europe
CLUPGR000012	Greece	Wolf	4	4253	7095492	0.158115	Greece	Europe
CLUPIR000001	Iran	Wolf	4	43167	7116913	0.0722267	Iran	Asia
CLUPIR000002	Iran	Wolf	4	20000	6957109	0.0530756	Iran	Asia
CLUPIR000003	Iran	Wolf	4	43346	7159442	0.0511427	Iran	Asia
CLUPIR000004	Iran	Wolf	4	19759	6971810	0.040861	Iran	Asia
CLUPIR000005	Iran	Wolf	4	23480	7157047	0.0616658	Iran	Asia
CLUPIR000006	Iran	Wolf	4	22385	7139548	0.0599874	Iran	Asia
CLUPKZ000002	Kazakhstan	Wolf	4	30389	7078651	0.200192	Kazakhstan	Asia
CLUPPT000001	Portugal	Wolf	4	17065	7038633	0.374144	Portugal	Europe
CLUPPT000002	Portugal	Wolf	4	24797	7064039	0.181391	Portugal	Europe
CLUPRU000001	Russia	Wolf	4	38541	7085926	0.037153	Russia	Europe
CLUPRU000002	Russia	Wolf	4	39839	7082178	0.0614785	Russia	Europe
CLUPRU000003	Russia	Wolf	4	45360	7080505	0.08352	Russia	Europe
CLUPRU000004	Russia	Wolf	4	22507	7076510	0.0637904	Russia	Europe
CLUPRU000005	Russia	Wolf	4	13940	7091217	0.186494	Russia	Europe
CLUPRU000006	Russia	Wolf	4	9991	7098762	0.072599	Russia	Europe
CLUPRU000007	Russia	Wolf	4	9234	7099310	0.0702179	Russia	Europe
CLUPRU000008	Russia	Wolf	4	19099	7084794	0.0678746	Russia	Europe
CLUPRU000009	Russia	Wolf	4	27712	7110449	0.251789	Russia	Europe
CLUPRU000010	Russia	Wolf	4	20769	7100420	0.0852471	Russia	Europe
CLUPRU000011	Russia	Wolf	4	27580	6991657	0.101423	Russia	Europe
CLUPRU000012	Russia	Wolf	4	19817	7013166	0.0786591	Russia	Europe
CLUPRU000013	Russia	Wolf	4	22078	7073687	0.0512777	Russia	Europe
CLUPRU000014	Russia	Wolf	4	42167	7036770	0.114815	Russia	Europe
CLUPSE000001	Sweden	Wolf	4	1412	7133295	0.367695	Sweden	Europe
CLUPSE000002	Sweden	Wolf	4	1334	7136720	0.314287	Sweden	Europe
CLUPSE000003	Sweden	Wolf	4	2270	7115043	0.424892	Sweden	Europe
CLUPSE000004	Sweden	Wolf	4	1517	7145675	0.405981	Sweden	Europe
CLUPSE000005	Sweden	Wolf	4	7994	7120195	0.102004	Sweden	Europe
CLUPSE000006	Sweden	Wolf	4	1722	7139247	0.315282	Sweden	Europe
CLUPTJ000003	Tajikistan	Wolf	4	33516	7145006	0.0818089	Tajikistan	Asia
CLUPTJ000004	Tajikistan	Wolf	4	30226	7118249	0.0722339	Tajikistan	Asia
CLUPTJ000005	Tajikistan	Wolf	4	40616	7166086	0.0537943	Tajikistan	Asia
CLUPTJ000006	Tajikistan	Wolf	4	29371	7145583	0.162278	Tajikistan	Asia
CNCS000001	Cane Corso	Breed_Dogs	1	736	4754038	0.326207	Italy	Europe
CNCS000002	Cane Corso	Breed_Dogs	1	718	4711259	0.372615	Italy	Europe
CNCS000003	Cane Corso	Breed_Dogs	1	1022	4727558	0.215724	Italy	Europe
CNCS000004	Cane Corso	Breed_Dogs	1	1154	4730789	0.213037	Italy	Europe
CNTI000001	Continental Bulldog	Breed_Dogs	1	360	4734517	0.399393	Switzerland	Europe
CNTI000002	Continental Bulldog	Breed_Dogs	1	370	4736487	0.330975	Switzerland	Europe
CNTI000003	Continental Bulldog	Breed_Dogs	1	381	4720316	0.330968	Switzerland	Europe
CNTI000004	Continental Bulldog	Breed_Dogs	1	262	4715611	0.402436	Switzerland	Europe
CNTI000005	Continental Bulldog	Breed_Dogs	1	458	4725214	0.296156	Switzerland	Europe
CNTI000006	Continental Bulldog	Breed_Dogs	1	266	4734261	0.383606	Switzerland	Europe
COLL000001	Collie	Breed_Dogs	1	310	4774873	0.526459	United Kingdom	Europe
COLL000002	Collie	Breed_Dogs	1	329	4759072	0.518826	United Kingdom	Europe
COLL000003	Collie	Breed_Dogs	1	328	4772029	0.523704	United Kingdom	Europe
COLL000004	Collie	Breed_Dogs	1	416	4779538	0.41542	United Kingdom	Europe
COLL000005	Collie	Breed_Dogs	1	395	4780125	0.466692	United Kingdom	Europe
COLL000006	Collie	Breed_Dogs	1	357	4756368	0.494836	United Kingdom	Europe
COLL000007	Collie	Breed_Dogs	1	292	4767222	0.501086	United Kingdom	Europe
COLL000008	Collie	Breed_Dogs	1	204	4780612	0.523136	United Kingdom	Europe
COLL000009	Collie	Breed_Dogs	1	203	4775700	0.476969	United Kingdom	Europe
COLL000010	Collie	Breed_Dogs	1	243	4784519	0.493286	United Kingdom	Europe
COLL000011	Collie	Breed_Dogs	1	333	4769911	0.472035	United Kingdom	Europe
COLL000012	Collie	Breed_Dogs	1	274	4756639	0.498534	United Kingdom	Europe
COLL000013	Collie	Breed_Dogs	1	362	4787954	0.590307	United Kingdom	Europe
COOK000001	Chinook	Breed_Dogs	1	159	4375102	0.437203	United States	Americas
COOK000002	Chinook	Breed_Dogs	1	312	4363499	0.457482	United States	Americas
COOK000003	Chinook	Breed_Dogs	1	299	4376368	0.414107	United States	Americas
COOK000004	Chinook	Breed_Dogs	1	484	4374561	0.435286	United States	Americas
COOK000005	Chinook	Breed_Dogs	1	226	4386311	0.446438	United States	Americas
COOK000006	Chinook	Breed_Dogs	1	272	4388555	0.493681	United States	Americas
COTO000001	Coton de Tulear	Breed_Dogs	1	2622	4834710	0.214185	Madagascar	Africa
COTO000003	Coton de Tulear	Breed_Dogs	1	2544	4760275	0.171054	Madagascar	Africa
COTO000004	Coton de Tulear	Breed_Dogs	1	2438	4788050	0.188347	Madagascar	Africa
CRES000001	Chinese Crested	Breed_Dogs	1	1726	4816410	0.276175	China	Asia
CRES000002	Chinese Crested	Breed_Dogs	1	2435	4779375	0.255958	China	Asia
CRSP000001	Croatian Sheepdog	Breed_Dogs	1	800	4740310	0.240229	Croatia	Europe
CRSP000002	Croatian Sheepdog	Breed_Dogs	1	941	4750665	0.242781	Croatia	Europe
CRSP000003	Croatian Sheepdog	Breed_Dogs	1	1637	4732386	0.19283	Croatia	Europe
CRSP000004	Croatian Sheepdog	Breed_Dogs	1	1488	4745773	0.202187	Croatia	Europe
CRTR000001	Cretan Tracer	Breed_Dogs	1	2867	4797267	0.129386	Greece	Europe
CRTR000002	Cretan Tracer	Breed_Dogs	1	1662	4666816	0.159058	Greece	Europe
CRTR000003	Cretan Tracer	Breed_Dogs	1	1172	4654259	0.229826	Greece	Europe
CRTR000004	Cretan Tracer	Breed_Dogs	1	2460	4607452	0.13025	Greece	Europe
CRTR000005	Cretan Tracer	Breed_Dogs	1	2742	4690555	0.145595	Greece	Europe
CRTR000006	Cretan Tracer	Breed_Dogs	1	1185	4676777	0.170065	Greece	Europe
CRTR000007	Cretan Tracer	Breed_Dogs	1	2309	4725344	0.112974	Greece	Europe
CRTR000008	Hellenic Hound	Breed_Dogs	1	1581	4843069	0.177099	Greece	Europe
CRTR000009	Hellenic Hound	Breed_Dogs	1	2454	4819360	0.13363	Greece	Europe
CRTR000010	Hellenic Hound	Breed_Dogs	1	1661	4843249	0.142025	Greece	Europe
CRTR000011	Hellenic Hound	Breed_Dogs	1	2926	4804993	0.120532	Greece	Europe
CRTR000012	Hellenic Hound	Breed_Dogs	1	2346	4825406	0.131339	Greece	Europe
CSHD000001	Catalan Sheepdog	Breed_Dogs	1	704	4655163	0.344072	Spain	Europe
CSHD000002	Catalan Sheepdog	Breed_Dogs	1	1067	4659491	0.214339	Spain	Europe
CSHD000003	Catalan Sheepdog	Breed_Dogs	1	1248	4676619	0.242316	Spain	Europe
CSHD000004	Catalan Sheepdog	Breed_Dogs	1	1080	4682641	0.300863	Spain	Europe
CSHD000005	Catalan Sheepdog	Breed_Dogs	1	1298	4684798	0.245884	Spain	Europe
CSKT000003	Cesky Terrier	Breed_Dogs	1	221	4773202	0.471471	Czech Republic	Europe
CSKT000005	Cesky Terrier	Breed_Dogs	1	284	4784132	0.441535	Czech Republic	Europe
CSKT000006	Cesky Terrier	Breed_Dogs	1	208	4785046	0.470367	Czech Republic	Europe
CSKT000007	Cesky Terrier	Breed_Dogs	1	257	4739927	0.47291	Czech Republic	Europe
CSKT000008	Cesky Terrier	Breed_Dogs	1	232	4779569	0.48386	Czech Republic	Europe
CTLB000001	Catalburun	Breed_Dogs	1	2233	4790763	0.142984	Turkey	Asia
CTLB000002	Catalburun	Breed_Dogs	1	2741	4844563	0.150763	Turkey	Asia
CTLB000003	Catalburun	Breed_Dogs	1	2338	4786415	0.193322	Turkey	Asia
CZEC000001	Czechoslovakian Wolfdog	Breed_Dogs	4	1270	4260440	0.342206	Czech Republic	Europe
CZEC000002	Czechoslovakian Wolfdog	Breed_Dogs	4	1006	4537191	0.434165	Czech Republic	Europe
CZEC000003	Czechoslovakian Wolfdog	Breed_Dogs	4	581	4546910	0.574444	Czech Republic	Europe
CZEC000004	Czechoslovakian Wolfdog	Breed_Dogs	4	957	4216216	0.355209	Czech Republic	Europe
DACH000001	Dachshund	Breed_Dogs	1	851	4777932	0.250513	Germany	Europe
DACH000002	Dachshund	Breed_Dogs	1	842	4765210	0.406738	Germany	Europe
DACH000003	Dachshund	Breed_Dogs	1	604	4760665	0.312072	Germany	Europe
DACH000004	Dachshund	Breed_Dogs	1	822	4781931	0.27101	Germany	Europe
DACH000005	Dachshund	Breed_Dogs	1	1208	4780781	0.13356	Germany	Europe
DACH000006	Dachshund	Breed_Dogs	1	763	4763651	0.320953	Germany	Europe
DACH000007	Dachshund	Breed_Dogs	1	1271	4783064	0.228561	Germany	Europe
DACH000008	Dachshund	Breed_Dogs	1	533	4769186	0.393187	Germany	Europe
DACH000009	Dachshund	Breed_Dogs	1	528	4779419	0.350585	Germany	Europe
DACH000010	Dachshund	Breed_Dogs	1	423	4759004	0.339234	Germany	Europe
DACH000011	Dachshund	Breed_Dogs	1	595	4749205	0.349463	Germany	Europe
DACH000012	Dachshund	Breed_Dogs	1	819	4760884	0.297666	Germany	Europe
DACH000013	Dachshund	Breed_Dogs	1	486	4758279	0.488065	Germany	Europe
DACH000014	Dachshund	Breed_Dogs	1	642	4796272	0.33586	Germany	Europe
DACH000015	Dachshund	Breed_Dogs	1	684	4778192	0.278672	Germany	Europe
DACH000016	Dachshund	Breed_Dogs	1	741	4796809	0.269617	Germany	Europe
DACH000017	Dachshund	Breed_Dogs	1	1467	4765963	0.156068	Germany	Europe
DALM000001	Dalmatian	Breed_Dogs	1	970	4740840	0.331291	Croatia	Europe
DALM000002	Dalmatian	Breed_Dogs	1	948	4751112	0.327563	Croatia	Europe
DALM000003	Dalmatian	Breed_Dogs	1	928	4758493	0.306324	Croatia	Europe
DALM000004	Dalmatian	Breed_Dogs	1	909	4762979	0.297545	Croatia	Europe
DALM000005	Dalmatian	Breed_Dogs	1	789	4785588	0.32435	Croatia	Europe
DAND000001	Dandie Dinmont Terrier	Breed_Dogs	1	399	4743859	0.410544	United Kingdom	Europe
DAND000002	Dandie Dinmont Terrier	Breed_Dogs	1	287	4771458	0.456908	United Kingdom	Europe
DAND000003	Dandie Dinmont Terrier	Breed_Dogs	1	161	4761938	0.443018	United Kingdom	Europe
DAND000004	Dandie Dinmont Terrier	Breed_Dogs	1	372	4778099	0.414367	United Kingdom	Europe
DAND000005	Dandie Dinmont Terrier	Breed_Dogs	1	335	4762436	0.443656	United Kingdom	Europe
DAND000006	Dandie Dinmont Terrier	Breed_Dogs	1	342	4735584	0.523847	United Kingdom	Europe
DARG000001	Dogo Argentino	Breed_Dogs	1	1633	4725660	0.42981	Argentina	Americas
DARG000002	Dogo Argentino	Breed_Dogs	1	941	4729889	0.333033	Argentina	Americas
DARG000003	Dogo Argentino	Breed_Dogs	1	868	4737731	0.319166	Argentina	Americas
DARG000004	Dogo Argentino	Breed_Dogs	1	662	4756150	0.298736	Argentina	Americas
DARG000005	Dogo Argentino	Breed_Dogs	1	693	4731569	0.34093	Argentina	Americas
DDBX000001	Dogue de Bordeaux	Breed_Dogs	1	569	4761162	0.378359	France	Europe
DDBX000002	Dogue de Bordeaux	Breed_Dogs	1	374	4771830	0.429857	France	Europe
DDBX000003	Dogue de Bordeaux	Breed_Dogs	1	369	4752887	0.395332	France	Europe
DDBX000004	Dogue de Bordeaux	Breed_Dogs	1	332	4760020	0.39319	France	Europe
DDBX000005	Dogue de Bordeaux	Breed_Dogs	1	354	4759140	0.428756	France	Europe
DEER000001	Scottish Deerhound	Breed_Dogs	1	879	4695429	0.390278	United Kingdom	Europe
DEER000002	Scottish Deerhound	Breed_Dogs	1	881	4689300	0.42398	United Kingdom	Europe
DEER000003	Scottish Deerhound	Breed_Dogs	1	828	4697927	0.507283	United Kingdom	Europe
DOBP000001	Doberman Pinscher	Breed_Dogs	1	236	4690760	0.436606	Germany	Europe
DOBP000002	Doberman Pinscher	Breed_Dogs	1	310	4682240	0.403345	Germany	Europe
DOBP000003	Doberman Pinscher	Breed_Dogs	1	417	4679332	0.385587	Germany	Europe
DOBP000004	Doberman Pinscher	Breed_Dogs	1	269	4688155	0.397145	Germany	Europe
DOBP000005	Doberman Pinscher	Breed_Dogs	1	340	4696816	0.381686	Germany	Europe
DOBP000006	Doberman Pinscher	Breed_Dogs	1	282	4717065	0.435786	Germany	Europe
DOBP000007	Doberman Pinscher	Breed_Dogs	1	308	4663075	0.444815	Germany	Europe
DREV000001	Drever	Breed_Dogs	1	458	4740322	0.507262	Sweden	Europe
DREV000002	Drever	Breed_Dogs	1	747	4755382	0.299755	Sweden	Europe
DREV000003	Drever	Breed_Dogs	1	614	4736238	0.319776	Sweden	Europe
DREV000004	Drever	Breed_Dogs	1	580	4767783	0.330048	Sweden	Europe
DREV000005	Drever	Breed_Dogs	1	803	4758052	0.344453	Sweden	Europe
DREV000006	Drever	Breed_Dogs	1	650	4746389	0.292666	Sweden	Europe
DSFD000001	Danish-Swedish Farmdog	Breed_Dogs	1	1178	4727826	0.175755	Denmark	Europe
DSFD000002	Danish-Swedish Farmdog	Breed_Dogs	1	874	4735562	0.308638	Denmark	Europe
DSFD000003	Danish-Swedish Farmdog	Breed_Dogs	1	1533	4739796	0.154938	Denmark	Europe
DSFD000004	Danish-Swedish Farmdog	Breed_Dogs	1	968	4748651	0.22079	Denmark	Europe
DSFD000005	Danish-Swedish Farmdog	Breed_Dogs	1	1065	4765662	0.180116	Denmark	Europe
DSFD000006	Danish-Swedish Farmdog	Breed_Dogs	1	981	4730750	0.194482	Denmark	Europe
DSHP000002	Dutch Shepherd	Breed_Dogs	1	924	4290268	0.369725	Netherlands	Europe
DSHP000003	Dutch Shepherd	Breed_Dogs	1	936	4458315	0.460038	Netherlands	Europe
DSHP000004	Dutch Shepherd	Breed_Dogs	1	1271	4679319	0.41624	Netherlands	Europe
DSHP000005	Dutch Shepherd	Breed_Dogs	1	763	4361565	0.177643	Netherlands	Europe
DSHP000006	Dutch Shepherd	Breed_Dogs	1	710	4299142	0.280721	Netherlands	Europe
DUPD000001	Dutch Partridge Dog	Breed_Dogs	1	1372	4758480	0.360296	Netherlands	Europe
ECKR000001	English Cocker Spaniel	Breed_Dogs	1	525	4740391	0.405115	United Kingdom	Europe
ECKR000002	English Cocker Spaniel	Breed_Dogs	1	535	4744399	0.387234	United Kingdom	Europe
ECKR000003	English Cocker Spaniel	Breed_Dogs	1	641	4759048	0.317434	United Kingdom	Europe
EEUS000001	East-European shepherd	Breed_Dogs	1	478	3471684	0.386638	Russia	Europe
EEUS000002	East-European shepherd	Breed_Dogs	1	575	3544800	0.3288	Russia	Europe
EEUS000003	East-European shepherd	Breed_Dogs	1	417	3475799	0.332611	Russia	Europe
EFXH000002	English Foxhound	Breed_Dogs	1	645	4777182	0.361086	United Kingdom	Europe
EFXH000003	English Foxhound	Breed_Dogs	1	562	4773302	0.323087	United Kingdom	Europe
EGTT000001	English Toy Spaniel	Breed_Dogs	1	479	4736635	0.284156	United Kingdom	Europe
EGTT000002	English Toy Spaniel	Breed_Dogs	1	531	4712147	0.490834	United Kingdom	Europe
EGTT000003	English Toy Spaniel	Breed_Dogs	1	498	4739956	0.47792	United Kingdom	Europe
EGTT000004	English Shepherd	Breed_Dogs	1	1337	4690334	0.252344	United States	Americas
EGTT000005	English Shepherd	Breed_Dogs	1	1487	4753404	0.188856	United States	Americas
EGTT000006	English Shepherd	Breed_Dogs	1	1795	4770373	0.255765	United States	Americas
EGTT000007	English Toy Terrier	Breed_Dogs	1	176	4790272	0.211925	United Kingdom	Europe
EGTT000008	English Toy Terrier	Breed_Dogs	1	244	4772683	0.222599	United Kingdom	Europe
EGTT000009	English Toy Terrier	Breed_Dogs	1	326	4778011	0.334828	United Kingdom	Europe
EGTT000010	English Toy Terrier	Breed_Dogs	1	380	4787222	0.305453	United Kingdom	Europe
EGTT000011	English Toy Terrier	Breed_Dogs	1	466	4788379	0.390097	United Kingdom	Europe
EGTT000012	English Toy Terrier	Breed_Dogs	1	350	4788062	0.308858	United Kingdom	Europe
EGTT000013	English Toy Terrier	Breed_Dogs	1	390	4779529	0.362104	United Kingdom	Europe
EGTT000014	English Toy Terrier	Breed_Dogs	1	352	4765949	0.339193	United Kingdom	Europe
EGTT000015	English Toy Terrier	Breed_Dogs	1	372	4783988	0.268002	United Kingdom	Europe
EGTT000016	English Toy Terrier	Breed_Dogs	1	300	4780708	0.229233	United Kingdom	Europe
ELOD000001	Elo	Breed_Dogs	2	549	5030513	0.189525	Germany	Europe
ELOD000002	Elo	Breed_Dogs	2	809	5178013	0.209675	Germany	Europe
ELOD000003	Elo	Breed_Dogs	2	452	4988727	0.200623	Germany	Europe
ELOD000004	Elo	Breed_Dogs	2	664	4974142	0.205918	Germany	Europe
ELOD000005	Elo	Breed_Dogs	2	651	5060360	0.176842	Germany	Europe
ENTB000001	Entlebucher Mountain Dog	Breed_Dogs	1	178	4735795	0.518707	Switzerland	Europe
ENTB000002	Entlebucher Mountain Dog	Breed_Dogs	1	230	4737997	0.470109	Switzerland	Europe
ENTB000003	Entlebucher Mountain Dog	Breed_Dogs	1	373	4755618	0.430041	Switzerland	Europe
ENTB000004	Entlebucher Mountain Dog	Breed_Dogs	1	240	4713164	0.4466	Switzerland	Europe
ENTB000005	Entlebucher Mountain Dog	Breed_Dogs	1	213	4771240	0.459549	Switzerland	Europe
ENTB000006	Entlebucher Mountain Dog	Breed_Dogs	1	232	4758946	0.39918	Switzerland	Europe
ENTB000007	Entlebucher Mountain Dog	Breed_Dogs	1	269	4735256	0.428366	Switzerland	Europe
ENTB000008	Entlebucher Mountain Dog	Breed_Dogs	1	244	4762043	0.424758	Switzerland	Europe
ENTB000009	Entlebucher Mountain Dog	Breed_Dogs	1	168	4755330	0.410424	Switzerland	Europe
EPNT000001	English Pointer	Breed_Dogs	1	1203	4781926	0.317881	United Kingdom	Europe
EPNT000002	English Pointer	Breed_Dogs	1	485	4775328	0.318708	United Kingdom	Europe
EPNT000003	English Pointer	Breed_Dogs	1	509	4762880	0.435125	United Kingdom	Europe
EPNT000004	English Pointer	Breed_Dogs	1	488	4765763	0.389358	United Kingdom	Europe
EPNT000005	English Pointer	Breed_Dogs	1	328	4753940	0.463715	United Kingdom	Europe
EPNT000006	English Pointer	Breed_Dogs	1	503	4768010	0.394613	United Kingdom	Europe
EPNT000007	English Pointer	Breed_Dogs	1	645	4769415	0.201136	United Kingdom	Europe
EPNT000008	English Pointer	Breed_Dogs	1	777	4746169	0.245074	United Kingdom	Europe
ESET000001	English Setter	Breed_Dogs	1	613	4759266	0.481042	United Kingdom	Europe
ESET000002	English Setter	Breed_Dogs	1	961	4768697	0.286198	United Kingdom	Europe
ESET000004	English Setter	Breed_Dogs	1	907	4735219	0.305923	United Kingdom	Europe
ESMD000001	Estrela Mountain Dog	Breed_Dogs	1	2896	4822986	0.164597	Portugal	Europe
ESMD000002	Estrela Mountain Dog	Breed_Dogs	1	2869	4810042	0.174607	Portugal	Europe
ESMD000003	Estrela Mountain Dog	Breed_Dogs	1	3359	4788181	0.171492	Portugal	Europe
ESMD000004	Estrela Mountain Dog	Breed_Dogs	1	2260	4807953	0.227671	Portugal	Europe
ESMD000005	Estrela Mountain Dog	Breed_Dogs	1	2429	4787497	0.203262	Portugal	Europe
ESMD000006	Estrela Mountain Dog	Breed_Dogs	1	2370	4777941	0.165429	Portugal	Europe
ESSP000001	English Springer Spaniel	Breed_Dogs	1	578	4762317	0.449527	United Kingdom	Europe
ESSP000002	English Springer Spaniel	Breed_Dogs	1	643	4777788	0.390645	United Kingdom	Europe
ESSP000003	English Springer Spaniel	Breed_Dogs	1	1178	4761796	0.29262	United Kingdom	Europe
ESTH000001	Estonian Hound	Breed_Dogs	1	842	4735936	0.287597	Estonia	Europe
ESTH000002	Estonian Hound	Breed_Dogs	1	771	4735315	0.296314	Estonia	Europe
ESTH000003	Estonian Hound	Breed_Dogs	1	761	4754543	0.269067	Estonia	Europe
EURA000001	Eurasier	Breed_Dogs	2	1432	5255103	0.257496	Germany	Europe
EURA000002	Eurasier	Breed_Dogs	2	920	5197133	0.257968	Germany	Europe
EURA000003	Eurasier	Breed_Dogs	2	821	5201259	0.299146	Germany	Europe
EURA000004	Eurasier	Breed_Dogs	2	1479	5209412	0.202105	Germany	Europe
FBUL000001	French Bulldog	Breed_Dogs	1	503	4758212	0.344269	France	Europe
FBUL000002	French Bulldog	Breed_Dogs	1	589	4758950	0.338077	France	Europe
FBUL000003	French Bulldog	Breed_Dogs	1	653	4730398	0.369816	France	Europe
FBUL000004	French Bulldog	Breed_Dogs	1	527	4742406	0.321607	France	Europe
FBUL000005	French Bulldog	Breed_Dogs	1	861	4749441	0.256957	France	Europe
FBUL000006	French Bulldog	Breed_Dogs	1	690	4749869	0.3342	France	Europe
FIEL000001	Field Spaniel	Breed_Dogs	1	262	4787026	0.450088	United Kingdom	Europe
FIEL000002	Field Spaniel	Breed_Dogs	1	169	4742026	0.404895	United Kingdom	Europe
FIEL000003	Field Spaniel	Breed_Dogs	1	171	4757597	0.375896	United Kingdom	Europe
FIEL000004	Field Spaniel	Breed_Dogs	1	350	4757710	0.463717	United Kingdom	Europe
FIEL000005	Field Spaniel	Breed_Dogs	1	362	4737608	0.464822	United Kingdom	Europe
FINH000001	Finnish Hound	Breed_Dogs	1	756	4786294	0.273718	Finland	Europe
FINH000002	Finnish Hound	Breed_Dogs	1	792	4799664	0.29323	Finland	Europe
FINH000003	Finnish Hound	Breed_Dogs	1	919	4776717	0.288518	Finland	Europe
FINH000004	Finnish Hound	Breed_Dogs	1	868	4777677	0.253882	Finland	Europe
FINH000005	Finnish Hound	Breed_Dogs	1	1417	4746051	0.268534	Finland	Europe
FINH000006	Finnish Hound	Breed_Dogs	1	642	4772978	0.291785	Finland	Europe
FINS000001	Finnish Spitz	Breed_Dogs	1	1146	4942265	0.401681	Finland	Europe
FINS000002	Finnish Spitz	Breed_Dogs	2	1392	4969618	0.340111	Finland	Europe
FINS000003	Finnish Spitz	Breed_Dogs	2	1323	4953322	0.308869	Finland	Europe
FINS000004	Finnish Spitz	Breed_Dogs	1	965	4974811	0.344636	Finland	Europe
FINS000005	Finnish Spitz	Breed_Dogs	1	1193	4954469	0.290979	Finland	Europe
FINS000006	Finnish Spitz	Breed_Dogs	2	1368	4971570	0.298774	Finland	Europe
FLCD000001	Bouvier des Flandres	Breed_Dogs	1	629	4731063	0.292663	Belgium	Europe
FLCD000002	Bouvier des Flandres	Breed_Dogs	1	495	4740285	0.390552	Belgium	Europe
FLCD000003	Bouvier des Flandres	Breed_Dogs	1	429	4730217	0.317016	Belgium	Europe
FLCD000004	Bouvier des Flandres	Breed_Dogs	1	364	4697829	0.424741	Belgium	Europe
FLCD000005	Bouvier des Flandres	Breed_Dogs	1	400	4726293	0.39128	Belgium	Europe
FLCD000006	Bouvier des Flandres	Breed_Dogs	1	338	4725521	0.360765	Belgium	Europe
FLCD000007	Bouvier des Flandres	Breed_Dogs	1	392	4724081	0.335329	Belgium	Europe
FLCD000008	Bouvier des Flandres	Breed_Dogs	1	875	4751841	0.269178	Belgium	Europe
FLCR000001	Flat-Coated Retriever	Breed_Dogs	1	482	4719527	0.485262	United Kingdom	Europe
FLCR000002	Flat-Coated Retriever	Breed_Dogs	1	529	4742521	0.409291	United Kingdom	Europe
FLCR000003	Flat-Coated Retriever	Breed_Dogs	1	826	4737875	0.399096	United Kingdom	Europe
FOMD000001	Formosan Mountain Dog	Breed_Dogs	2	5590	4954753	0.087831	Taiwan	Asia
FOMD000002	Formosan Mountain Dog	Breed_Dogs	2	5462	5333877	0.222351	Taiwan	Asia
FOMD000003	Formosan Mountain Dog	Breed_Dogs	2	4771	5251643	0.17617	Taiwan	Asia
FRSP000001	French Spaniel	Breed_Dogs	1	609	4749001	0.334082	France	Europe
FRSP000002	French Spaniel	Breed_Dogs	1	597	4744511	0.277063	France	Europe
FRSP000003	French Spaniel	Breed_Dogs	1	481	4769925	0.316858	France	Europe
FRSP000004	French Spaniel	Breed_Dogs	1	456	4761144	0.344143	France	Europe
FRSP000005	French Spaniel	Breed_Dogs	1	348	4763454	0.364054	France	Europe
FRSP000006	French Spaniel	Breed_Dogs	1	460	4740738	0.458747	France	Europe
FXTE000001	Wire Fox Terrier	Breed_Dogs	1	366	4768686	0.468553	United Kingdom	Europe
FXTE000002	Wire Fox Terrier	Breed_Dogs	1	288	4776790	0.426051	United Kingdom	Europe
FXTE000003	Smooth Fox Terrier	Breed_Dogs	1	359	4752321	0.409833	United Kingdom	Europe
FXTE000004	Smooth Fox Terrier	Breed_Dogs	1	263	4761887	0.435036	United Kingdom	Europe
FXTE000005	Smooth Fox Terrier	Breed_Dogs	1	233	4733373	0.447274	United Kingdom	Europe
FXTE000006	Smooth Fox Terrier	Breed_Dogs	1	588	4758563	0.432336	United Kingdom	Europe
GAFT000001	Great Anglo-French Tricolour Hound	Breed_Dogs	1	402	4822165	0.228445	France	Europe
GAFT000002	Great Anglo-French Tricolour Hound	Breed_Dogs	2	122	4883496	0.220135	France	Europe
GAFT000003	Great Anglo-French Tricolour Hound	Breed_Dogs	1	149	4876456	0.217876	France	Europe
GAFT000004	Great Anglo-French Tricolour Hound	Breed_Dogs	1	132	4794882	0.220936	France	Europe
GAFT000005	Great Anglo-French Tricolour Hound	Breed_Dogs	1	886	4758070	0.227256	France	Europe
GAFT000006	Great Anglo-French Tricolour Hound	Breed_Dogs	1	130	4801066	0.264868	France	Europe
GALG000001	Galgo Espanol	Breed_Dogs	1	2534	4736205	0.178256	Spain	Europe
GALG000002	Galgo Espanol	Breed_Dogs	1	2020	4772389	0.256553	Spain	Europe
GALG000003	Galgo Espanol	Breed_Dogs	1	1968	4783298	0.192407	Spain	Europe
GALG000004	Galgo Espanol	Breed_Dogs	1	2142	4740774	0.18846	Spain	Europe
GALG000005	Galgo Espanol	Breed_Dogs	1	3406	4758560	0.178824	Spain	Europe
GALG000006	Galgo Espanol	Breed_Dogs	1	3524	4748117	0.166806	Spain	Europe
GAWO000001	Great Anglo-French White and Orange Hound	Breed_Dogs	1	330	4764379	0.28739	France	Europe
GAWO000002	Great Anglo-French White and Orange Hound	Breed_Dogs	1	553	4750409	0.243405	France	Europe
GAWO000003	Great Anglo-French White and Orange Hound	Breed_Dogs	1	264	4755390	0.296246	France	Europe
GAWO000004	Great Anglo-French White and Orange Hound	Breed_Dogs	1	144	4790768	0.211922	France	Europe
GAWO000005	Great Anglo-French White and Orange Hound	Breed_Dogs	1	351	4785384	0.232099	France	Europe
GAWO000006	Great Anglo-French White and Orange Hound	Breed_Dogs	1	558	4754370	0.227095	France	Europe
GBGA000001	Grand Bleu de Gascogne	Breed_Dogs	1	1182	4773780	0.249366	France	Europe
GBGV000001	Grand Basset Griffon Vendeen	Breed_Dogs	1	406	4792283	0.262002	France	Europe
GBGV000002	Grand Basset Griffon Vendeen	Breed_Dogs	1	268	4759380	0.320247	France	Europe
GBGV000003	Grand Basset Griffon Vendeen	Breed_Dogs	1	218	4756470	0.413232	France	Europe
GBGV000004	Grand Basset Griffon Vendeen	Breed_Dogs	1	474	4772684	0.281593	France	Europe
GBGV000005	Grand Basset Griffon Vendeen	Breed_Dogs	1	283	4763598	0.385892	France	Europe
GFBR000001	Griffon Fauve de Bretagne	Breed_Dogs	1	1779	4794546	0.189033	France	Europe
GGVE000001	Grand Griffon Vendeen	Breed_Dogs	1	717	4793521	0.280983	France	Europe
GGVE000002	Grand Griffon Vendeen	Breed_Dogs	1	801	4808658	0.279193	France	Europe
GHND000001	German Hound	Breed_Dogs	1	438	4781902	0.343459	Germany	Europe
GHND000002	German Hound	Breed_Dogs	1	288	4766783	0.411437	Germany	Europe
GHND000003	German Hound	Breed_Dogs	1	476	4759459	0.370185	Germany	Europe
GHND000004	German Hound	Breed_Dogs	1	503	4767278	0.350732	Germany	Europe
GHND000005	German Hound	Breed_Dogs	1	332	4782755	0.341401	Germany	Europe
GHND000006	German Hound	Breed_Dogs	1	377	4753248	0.383176	Germany	Europe
GHUT000001	German Hunting Terrier	Breed_Dogs	1	372	4753677	0.358481	Germany	Europe
GHUT000002	German Hunting Terrier	Breed_Dogs	1	444	4750421	0.309805	Germany	Europe
GHUT000003	German Hunting Terrier	Breed_Dogs	1	435	4764670	0.305694	Germany	Europe
GHUT000004	German Hunting Terrier	Breed_Dogs	1	538	4747687	0.316694	Germany	Europe
GHUT000005	German Hunting Terrier	Breed_Dogs	1	263	4788111	0.529118	Germany	Europe
GHUT000006	German Hunting Terrier	Breed_Dogs	1	532	4751064	0.253137	Germany	Europe
GLEN000001	Glen of Imaal Terrier	Breed_Dogs	1	209	4768824	0.462584	Ireland	Europe
GLEN000002	Glen of Imaal Terrier	Breed_Dogs	1	287	4746642	0.343711	Ireland	Europe
GLEN000003	Glen of Imaal Terrier	Breed_Dogs	1	273	4757232	0.414652	Ireland	Europe
GLEN000004	Glen of Imaal Terrier	Breed_Dogs	1	237	4754033	0.368042	Ireland	Europe
GLEN000005	Glen of Imaal Terrier	Breed_Dogs	1	367	4739441	0.384424	Ireland	Europe
GLEN000006	Glen of Imaal Terrier	Breed_Dogs	1	358	4784640	0.420546	Ireland	Europe
GMSP000001	German Spaniel	Breed_Dogs	1	359	4748180	0.376188	Germany	Europe
GMSP000002	German Spaniel	Breed_Dogs	1	474	4721826	0.31857	Germany	Europe
GMSP000003	German Spaniel	Breed_Dogs	1	339	4746500	0.374694	Germany	Europe
GMSP000004	German Spaniel	Breed_Dogs	1	585	4762903	0.369206	Germany	Europe
GMSP000005	German Spaniel	Breed_Dogs	1	563	4742777	0.320303	Germany	Europe
GMSP000006	German Spaniel	Breed_Dogs	1	422	4749215	0.386845	Germany	Europe
GOLD000001	Golden Retriever	Breed_Dogs	1	873	4758617	0.309963	United Kingdom	Europe
GOLD000002	Golden Retriever	Breed_Dogs	1	379	4738870	0.340883	United Kingdom	Europe
GOLD000003	Golden Retriever	Breed_Dogs	1	407	4733711	0.366261	United Kingdom	Europe
GOLD000004	Golden Retriever	Breed_Dogs	1	349	4723575	0.401317	United Kingdom	Europe
GOLD000005	Golden Retriever	Breed_Dogs	1	402	4725167	0.346658	United Kingdom	Europe
GOLD000007	Golden Retriever	Breed_Dogs	1	372	4730484	0.414938	United Kingdom	Europe
GORD000002	Gordon Setter	Breed_Dogs	1	1331	4786123	0.255881	United Kingdom	Europe
GPIN000001	German Pinscher	Breed_Dogs	1	529	4758071	0.271535	Germany	Europe
GPIN000002	German Pinscher	Breed_Dogs	1	493	4748499	0.367294	Germany	Europe
GPIN000003	German Pinscher	Breed_Dogs	1	467	4759220	0.393881	Germany	Europe
GPIN000004	German Pinscher	Breed_Dogs	1	481	4766269	0.35345	Germany	Europe
GPYR000001	Great Pyrenees	Breed_Dogs	1	1679	4735843	0.227777	France	Europe
GPYR000002	Great Pyrenees	Breed_Dogs	1	2291	4794244	0.195289	France	Europe
GPYR000003	Great Pyrenees	Breed_Dogs	1	1008	4772359	0.304078	France	Europe
GPYR000004	Great Pyrenees	Breed_Dogs	1	1215	4788490	0.292017	France	Europe
GPYR000005	Great Pyrenees	Breed_Dogs	1	1532	4770424	0.226523	France	Europe
GPYR000006	Great Pyrenees	Breed_Dogs	1	945	4794206	0.308108	France	Europe
GREE000001	Greenland Dog	Breed_Dogs	3	4195	5464402	0.344599	Greenland	Americas
GREE000002	Greenland Dog	Breed_Dogs	3	5158	5444563	0.29046	Greenland	Americas
GREE000003	Greenland Dog	Breed_Dogs	3	4530	5490113	0.356541	Greenland	Americas
GRND000001	Groenendael	Breed_Dogs	1	315	4757829	0.403793	Belgium	Europe
GRND000002	Groenendael	Breed_Dogs	1	267	4714382	0.427915	Belgium	Europe
GRND000003	Groenendael	Breed_Dogs	1	446	4734084	0.379245	Belgium	Europe
GRNI000001	Griffon Nivernais	Breed_Dogs	1	1043	4765933	0.179881	France	Europe
GRNI000002	Griffon Nivernais	Breed_Dogs	1	1042	4771322	0.228915	France	Europe
GRNI000003	Griffon Nivernais	Breed_Dogs	1	959	4796095	0.199367	France	Europe
GRNI000004	Griffon Nivernais	Breed_Dogs	1	1110	4776805	0.155797	France	Europe
GRNI000005	Griffon Nivernais	Breed_Dogs	1	998	4773174	0.21149	France	Europe
GRNI000006	Griffon Nivernais	Breed_Dogs	1	1218	4772894	0.232818	France	Europe
GRSD000002	German Shepherd Dog	Breed_Dogs	1	583	3338353	0.348045	Germany	Europe
GRSD000003	German Shepherd Dog	Breed_Dogs	1	276	2985957	0.404498	Germany	Europe
GSHP000001	German Shorthaired Pointer	Breed_Dogs	1	695	4766227	0.21043	Germany	Europe
GSHP000002	German Shorthaired Pointer	Breed_Dogs	1	712	4753926	0.235789	Germany	Europe
GSHP000003	German Shorthaired Pointer	Breed_Dogs	1	869	4766775	0.232692	Germany	Europe
GSHP000004	German Shorthaired Pointer	Breed_Dogs	1	941	4747961	0.231449	Germany	Europe
GSMD000001	Greater Swiss Mountain Dog	Breed_Dogs	1	256	4731787	0.468777	Switzerland	Europe
GSMD000002	Greater Swiss Mountain Dog	Breed_Dogs	1	251	4737391	0.459696	Switzerland	Europe
GSMD000003	Greater Swiss Mountain Dog	Breed_Dogs	1	220	4735883	0.460917	Switzerland	Europe
GSMD000004	Greater Swiss Mountain Dog	Breed_Dogs	1	289	4739408	0.449598	Switzerland	Europe
GSMD000005	Greater Swiss Mountain Dog	Breed_Dogs	1	273	4738807	0.475847	Switzerland	Europe
GSMD000006	Greater Swiss Mountain Dog	Breed_Dogs	1	210	4734180	0.413851	Switzerland	Europe
GSMD000007	Greater Swiss Mountain Dog	Breed_Dogs	1	281	4740964	0.422619	Switzerland	Europe
GSMD000008	Greater Swiss Mountain Dog	Breed_Dogs	1	179	4723153	0.443114	Switzerland	Europe
GSMD000009	Greater Swiss Mountain Dog	Breed_Dogs	1	241	4741760	0.473731	Switzerland	Europe
GSMD000010	Greater Swiss Mountain Dog	Breed_Dogs	1	223	4733393	0.413051	Switzerland	Europe
GSNZ000001	Giant Schnauzer	Breed_Dogs	1	763	4763079	0.278755	Germany	Europe
GSNZ000002	Giant Schnauzer	Breed_Dogs	1	602	4773377	0.351562	Germany	Europe
GSNZ000003	Giant Schnauzer	Breed_Dogs	1	639	4722647	0.293385	Germany	Europe
GSNZ000004	Giant Schnauzer	Breed_Dogs	1	854	4738394	0.263873	Germany	Europe
GSNZ000005	Giant Schnauzer	Breed_Dogs	1	626	4771275	0.296116	Germany	Europe
GSNZ000006	Giant Schnauzer	Breed_Dogs	1	558	4769872	0.294832	Germany	Europe
GSPK000001	German Spitz Klein	Breed_Dogs	1	628	4768643	0.211012	Germany	Europe
GSPK000002	German Spitz Klein	Breed_Dogs	1	515	4790012	0.205387	Germany	Europe
GSPK000003	German Spitz Klein	Breed_Dogs	1	755	4773581	0.209193	Germany	Europe
GSPK000004	German Spitz Klein	Breed_Dogs	1	669	4789339	0.209491	Germany	Europe
GSPK000005	German Spitz Klein	Breed_Dogs	1	665	4785718	0.153627	Germany	Europe
GSPK000006	German Spitz Klein	Breed_Dogs	1	592	4771547	0.165673	Germany	Europe
GSPK000007	German Spitz Klein	Breed_Dogs	1	687	4793438	0.221518	Germany	Europe
GSPK000008	German Spitz Klein	Breed_Dogs	1	636	4792932	0.176274	Germany	Europe
GSPK000009	German Spitz Klein	Breed_Dogs	1	640	4794550	0.162576	Germany	Europe
GSPK000010	German Spitz Klein	Breed_Dogs	1	531	4806489	0.246714	Germany	Europe
GSPK000011	German Spitz Klein	Breed_Dogs	1	430	4805653	0.284598	Germany	Europe
GSPZ000001	German Spitz	Breed_Dogs	1	1070	4866644	0.152473	Germany	Europe
GSPZ000002	German Spitz	Breed_Dogs	1	702	4867319	0.159164	Germany	Europe
GSPZ000003	German Spitz	Breed_Dogs	1	442	4806801	0.269489	Germany	Europe
GSPZ000004	German Spitz	Breed_Dogs	1	375	4814319	0.334464	Germany	Europe
GSPZ000005	German Spitz	Breed_Dogs	1	117	4790873	0.139243	Germany	Europe
GSPZ000006	German Spitz	Breed_Dogs	1	970	4780664	0.128945	Germany	Europe
GSZG000001	German Giant Spitz	Breed_Dogs	1	227	4784084	0.191166	Germany	Europe
GSZG000002	German Giant Spitz	Breed_Dogs	1	242	4819374	0.334854	Germany	Europe
GSZG000003	German Giant Spitz	Breed_Dogs	1	385	4775557	0.169428	Germany	Europe
GSZG000004	German Giant Spitz	Breed_Dogs	1	486	4803729	0.169219	Germany	Europe
GSZG000005	German Giant Spitz	Breed_Dogs	1	412	4800392	0.202923	Germany	Europe
GSZG000006	German Giant Spitz	Breed_Dogs	1	561	4805921	0.177262	Germany	Europe
GSZG000007	Pomeranian	Breed_Dogs	1	646	4785238	0.182905	Germany	Europe
GSZM000001	German Spitz Mittel	Breed_Dogs	1	732	4798905	0.213337	Germany	Europe
GSZM000002	German Spitz Mittel	Breed_Dogs	1	739	4799218	0.272347	Germany	Europe
GSZM000003	German Spitz Mittel	Breed_Dogs	1	878	4790905	0.165298	Germany	Europe
GSZM000004	German Spitz Mittel	Breed_Dogs	1	746	4809478	0.182434	Germany	Europe
GSZM000005	German Spitz Mittel	Breed_Dogs	1	723	4796495	0.180255	Germany	Europe
GSZM000006	German Spitz Mittel	Breed_Dogs	1	636	4808934	0.18537	Germany	Europe
GSZM000007	German Spitz Mittel	Breed_Dogs	1	648	4793300	0.269156	Germany	Europe
GSZM000008	German Spitz Mittel	Breed_Dogs	1	375	4799936	0.326025	Germany	Europe
GSZM000009	German Spitz Mittel	Breed_Dogs	1	687	4817878	0.250426	Germany	Europe
GSZM000010	German Spitz Mittel	Breed_Dogs	1	654	4798764	0.197045	Germany	Europe
GSZM000011	German Spitz Mittel	Breed_Dogs	1	569	4809112	0.166555	Germany	Europe
GSZM000012	German Spitz Mittel	Breed_Dogs	1	718	4801317	0.153928	Germany	Europe
GTLH000001	Gotland Hound	Breed_Dogs	1	1421	4795651	0.282034	Sweden	Europe
GWHP000001	German Wirehaired Pointer	Breed_Dogs	1	402	4746494	0.323995	Germany	Europe
GWHP000002	German Wirehaired Pointer	Breed_Dogs	1	342	4752353	0.275785	Germany	Europe
GWHP000003	German Wirehaired Pointer	Breed_Dogs	1	746	4740248	0.300781	Germany	Europe
GWHP000004	German Wirehaired Pointer	Breed_Dogs	1	761	4756014	0.264984	Germany	Europe
GWHP000005	German Wirehaired Pointer	Breed_Dogs	1	790	4759715	0.203827	Germany	Europe
HAEL000001	Hallefors Elkhound	Breed_Dogs	2	2177	4950435	0.326065	Sweden	Europe
HARR000001	Harrier	Breed_Dogs	1	595	4778054	0.303464	United Kingdom	Europe
HARR000002	Harrier	Breed_Dogs	1	656	4798023	0.257229	United Kingdom	Europe
HARR000003	Harrier	Breed_Dogs	1	673	4804630	0.317209	United Kingdom	Europe
HAVA000001	Havanese	Breed_Dogs	1	1420	4753597	0.135986	Cuba	Americas
HAVA000002	Havanese	Breed_Dogs	1	491	4813759	0.262223	Cuba	Americas
HAVA000003	Havanese	Breed_Dogs	1	526	4814785	0.288104	Cuba	Americas
HELH000001	Hellenic Hound	Breed_Dogs	1	2436	4847781	0.258423	Greece	Europe
HOBO000001	Hortaya Borzaya	Breed_Dogs	1	3463	4899109	0.147606	Russia	Europe
HOBO000002	Hortaya Borzaya	Breed_Dogs	2	3656	4890903	0.290923	Russia	Europe
HOKK000001	Hokkaido	Breed_Dogs	3	4995	5606806	0.422169	Japan	Asia
HOKK000002	Hokkaido	Breed_Dogs	3	5771	5579164	0.349081	Japan	Asia
HOVA000001	Hovawart	Breed_Dogs	1	639	4424034	0.395146	Germany	Europe
HOVA000002	Hovawart	Breed_Dogs	1	461	4454908	0.365985	Germany	Europe
HOVA000003	Hovawart	Breed_Dogs	1	521	4384454	0.381388	Germany	Europe
HOVA000004	Hovawart	Breed_Dogs	1	430	4412553	0.355302	Germany	Europe
HSHP000001	Vizsla	Breed_Dogs	1	831	4757712	0.255306	Hungary	Europe
HTSV000001	Hamiltonstovare	Breed_Dogs	1	818	4778384	0.225782	Sweden	Europe
HTSV000002	Hamiltonstovare	Breed_Dogs	1	618	4763584	0.161305	Sweden	Europe
HTSV000003	Hamiltonstovare	Breed_Dogs	1	652	4799847	0.281069	Sweden	Europe
HTSV000004	Hamiltonstovare	Breed_Dogs	1	710	4768308	0.195942	Sweden	Europe
HTSV000005	Hamiltonstovare	Breed_Dogs	1	727	4778013	0.252311	Sweden	Europe
HTSV000006	Hamiltonstovare	Breed_Dogs	1	688	4797051	0.266203	Sweden	Europe
HTSV000007	Hamiltonstovare	Breed_Dogs	1	628	4801226	0.303103	Sweden	Europe
HVSC000001	Hanoverian Scenthound	Breed_Dogs	1	1388	4756564	0.400556	Germany	Europe
HWHP000001	Vizsla	Breed_Dogs	1	746	4767997	0.354215	Hungary	Europe
IBIZ000001	Ibizan Hound	Breed_Dogs	1	623	4822489	0.241357	Spain	Europe
IBIZ000002	Ibizan Hound	Breed_Dogs	1	796	4806265	0.326628	Spain	Europe
IBIZ000003	Ibizan Hound	Breed_Dogs	1	348	4803289	0.255403	Spain	Europe
IBIZ000004	Ibizan Hound	Breed_Dogs	1	656	4818444	0.313076	Spain	Europe
IBIZ000005	Ibizan Hound	Breed_Dogs	1	340	4800076	0.24011	Spain	Europe
IBIZ000006	Ibizan Hound	Breed_Dogs	1	640	4784078	0.438085	Spain	Europe
IBIZ000007	Ibizan Hound	Breed_Dogs	1	957	4795803	0.399987	Spain	Europe
IBIZ000008	Ibizan Hound	Breed_Dogs	1	630	4796395	0.269181	Spain	Europe
IBIZ000009	Ibizan Hound	Breed_Dogs	1	581	4810609	0.333264	Spain	Europe
IBIZ000010	Ibizan Hound	Breed_Dogs	1	722	4796016	0.311365	Spain	Europe
IBIZ000011	Ibizan Hound	Breed_Dogs	1	847	4801645	0.266192	Spain	Europe
IBIZ000012	Ibizan Hound	Breed_Dogs	1	550	4819857	0.297112	Spain	Europe
IBIZ000013	Ibizan Hound	Breed_Dogs	1	858	4815528	0.350354	Spain	Europe
ICES000001	Icelandic Sheepdog	Breed_Dogs	1	1125	4819927	0.235517	Iceland	Europe
ICES000002	Icelandic Sheepdog	Breed_Dogs	1	1142	4805250	0.285526	Iceland	Europe
ICES000003	Icelandic Sheepdog	Breed_Dogs	1	771	4846510	0.423449	Iceland	Europe
ICES000004	Icelandic Sheepdog	Breed_Dogs	1	1257	4850803	0.296879	Iceland	Europe
ICES000005	Icelandic Sheepdog	Breed_Dogs	1	1200	4819601	0.246327	Iceland	Europe
ICES000006	Icelandic Sheepdog	Breed_Dogs	1	1173	4838854	0.271182	Iceland	Europe
IRIT000002	Irish Terrier	Breed_Dogs	1	913	4762003	0.401565	Ireland	Europe
IRIT000003	Irish Terrier	Breed_Dogs	1	778	4731887	0.498949	Ireland	Europe
IRSE000002	Irish Setter	Breed_Dogs	1	791	4756046	0.32883	Ireland	Europe
IRSE000003	Irish Setter	Breed_Dogs	1	677	4772370	0.410725	Ireland	Europe
IRSE000004	Irish Setter	Breed_Dogs	1	1103	4751891	0.205687	Ireland	Europe
IWSP000001	Irish Water Spaniel	Breed_Dogs	1	439	4723272	0.393528	Ireland	Europe
IWSP000002	Irish Water Spaniel	Breed_Dogs	1	435	4728312	0.346299	Ireland	Europe
IWSP000003	Irish Water Spaniel	Breed_Dogs	1	531	4728854	0.296198	Ireland	Europe
IWSP000004	Irish Water Spaniel	Breed_Dogs	1	513	4728955	0.425089	Ireland	Europe
JSPZ000001	Japanese Spitz	Breed_Dogs	1	334	4830618	0.277393	Japan	Asia
JSPZ000002	Japanese Spitz	Breed_Dogs	1	360	4841628	0.269703	Japan	Asia
JSPZ000003	Japanese Spitz	Breed_Dogs	1	206	4833562	0.358191	Japan	Asia
JSPZ000004	Japanese Spitz	Breed_Dogs	1	658	4856132	0.29076	Japan	Asia
JSPZ000005	Japanese Spitz	Breed_Dogs	1	2005	4826979	0.336352	Japan	Asia
JSPZ000006	Japanese Spitz	Breed_Dogs	1	508	4800063	0.359318	Japan	Asia
JSPZ000007	Japanese Spitz	Breed_Dogs	1	251	4821891	0.247442	Japan	Asia
JSPZ000008	Japanese Spitz	Breed_Dogs	1	206	4830185	0.296401	Japan	Asia
JSPZ000009	Japanese Spitz	Breed_Dogs	1	263	4806142	0.259791	Japan	Asia
JSPZ000010	Japanese Spitz	Breed_Dogs	1	143	4834740	0.311511	Japan	Asia
JSPZ000011	Japanese Spitz	Breed_Dogs	1	419	4830536	0.243082	Japan	Asia
JSPZ000012	Japanese Spitz	Breed_Dogs	1	358	4809888	0.318789	Japan	Asia
KAIK000001	Kai Ken	Breed_Dogs	2	2587	5382216	0.254666	Japan	Asia
KAIK000002	Kai Ken	Breed_Dogs	2	2773	5319338	0.189132	Japan	Asia
KAIK000003	Kai Ken	Breed_Dogs	2	86	5364313	0.171158	Japan	Asia
KAIK000004	Kai Ken	Breed_Dogs	2	4514	5381838	0.212415	Japan	Asia
KAIK000005	Kai Ken	Breed_Dogs	2	3770	5349245	0.284464	Japan	Asia
KANG000002	Kangal	Breed_Dogs	2	4936	5049724	0.114033	Turkey	Asia
KANG000003	Kangal	Breed_Dogs	2	6908	5052685	0.102923	Turkey	Asia
KARS000002	Kars	Breed_Dogs	2	6820	4990905	0.131289	Turkey	Asia
KARS000003	Kars	Breed_Dogs	2	7024	5039167	0.162816	Turkey	Asia
KARS000004	Kars	Breed_Dogs	2	6465	5008723	0.107787	Turkey	Asia
KARS000005	Kars	Breed_Dogs	2	5170	5060764	0.188393	Turkey	Asia
KARS000006	Kars	Breed_Dogs	2	3916	5055779	0.295457	Turkey	Asia
KEES000002	Keeshond	Breed_Dogs	1	572	4757796	0.350004	Germany	Europe
KEES000003	Keeshond	Breed_Dogs	1	567	4770253	0.200198	Germany	Europe
KEES000004	Keeshond	Breed_Dogs	1	556	4767032	0.200773	Germany	Europe
KEES000005	Keeshond	Breed_Dogs	1	497	4769823	0.319047	Germany	Europe
KEES000006	Keeshond	Breed_Dogs	1	425	4759767	0.371219	Germany	Europe
KEES000007	Keeshond	Breed_Dogs	1	434	4780452	0.227988	Germany	Europe
KEES000008	Keeshond	Breed_Dogs	1	402	4761974	0.249408	Germany	Europe
KEES000009	Keeshond	Breed_Dogs	1	445	4790111	0.236741	Germany	Europe
KEES000010	Keeshond	Breed_Dogs	1	601	4760317	0.208156	Germany	Europe
KEES000011	Keeshond	Breed_Dogs	1	593	4765760	0.205216	Germany	Europe
KEES000012	Keeshond	Breed_Dogs	1	825	4795561	0.208233	Germany	Europe
KERY000001	Kerry Blue Terrier	Breed_Dogs	1	1074	4761107	0.345371	Ireland	Europe
KERY000002	Kerry Blue Terrier	Breed_Dogs	1	1116	4745607	0.310556	Ireland	Europe
KINT000001	Kintamani	Breed_Dogs	3	21602	5827001	0.14315	Indonesia	Asia
KISH000001	Kishu	Breed_Dogs	3	7059	5605348	0.278207	Japan	Asia
KISH000002	Kishu	Breed_Dogs	3	6420	5609147	0.208054	Japan	Asia
KISH000003	Kishu	Breed_Dogs	3	5629	5588446	0.259396	Japan	Asia
KMUM000001	Small Munsterlander	Breed_Dogs	1	524	4759795	0.249936	Germany	Europe
KMUM000002	Small Munsterlander	Breed_Dogs	1	458	4761627	0.256995	Germany	Europe
KMUM000003	Small Munsterlander	Breed_Dogs	1	525	4758204	0.257606	Germany	Europe
KMUM000004	Small Munsterlander	Breed_Dogs	1	368	4764131	0.266793	Germany	Europe
KMUM000005	Small Munsterlander	Breed_Dogs	1	461	4752345	0.238836	Germany	Europe
KMUM000006	Small Munsterlander	Breed_Dogs	1	396	4795954	0.259955	Germany	Europe
KMUM000007	Small Munsterlander	Breed_Dogs	1	401	4762057	0.288637	Germany	Europe
KMUM000008	Small Munsterlander	Breed_Dogs	1	591	4769483	0.214684	Germany	Europe
KMUM000009	Small Munsterlander	Breed_Dogs	1	659	4782247	0.255092	Germany	Europe
KMUM000010	Small Munsterlander	Breed_Dogs	1	544	4757295	0.264685	Germany	Europe
KMUM000011	Small Munsterlander	Breed_Dogs	1	533	4753979	0.300537	Germany	Europe
KROM000001	Kromfohrlander	Breed_Dogs	1	250	4744626	0.398219	Germany	Europe
KROM000002	Kromfohrlander	Breed_Dogs	1	537	4755012	0.436759	Germany	Europe
KROM000003	Kromfohrlander	Breed_Dogs	1	255	4754932	0.459508	Germany	Europe
KROM000004	Kromfohrlander	Breed_Dogs	1	167	4751916	0.461054	Germany	Europe
KROM000005	Kromfohrlander	Breed_Dogs	1	540	4762221	0.138385	Germany	Europe
KROM000006	Kromfohrlander	Breed_Dogs	1	232	4756752	0.48019	Germany	Europe
KROM000007	Kromfohrlander	Breed_Dogs	1	226	4766699	0.444429	Germany	Europe
KUVZ000001	Kuvasz	Breed_Dogs	1	1278	4821866	0.257342	Hungary	Europe
KUVZ000003	Kuvasz	Breed_Dogs	1	1943	4823529	0.215483	Hungary	Europe
KUVZ000004	Kuvasz	Breed_Dogs	1	1605	4817664	0.186454	Hungary	Europe
KUVZ000005	Kuvasz	Breed_Dogs	1	1080	4828479	0.25085	Hungary	Europe
KUVZ000006	Kuvasz	Breed_Dogs	1	1494	4810425	0.216522	Hungary	Europe
KUVZ000007	Kuvasz	Breed_Dogs	1	1406	4823270	0.217814	Hungary	Europe
KUVZ000008	Kuvasz	Breed_Dogs	1	1268	4853957	0.258587	Hungary	Europe
LABR000001	Labrador Retriever	Breed_Dogs	1	665	4736041	0.258489	Canada	Americas
LABR000002	Labrador Retriever	Breed_Dogs	1	557	4740201	0.317352	Canada	Americas
LABR000003	Labrador Retriever	Breed_Dogs	1	503	4707054	0.322785	Canada	Americas
LABR000004	Labrador Retriever	Breed_Dogs	1	658	4731585	0.275164	Canada	Americas
LABR000005	Labrador Retriever	Breed_Dogs	1	442	4748418	0.346615	Canada	Americas
LABR000006	Labrador Retriever	Breed_Dogs	1	628	4740550	0.226529	Canada	Americas
LAEK000001	Belgian Laekenois	Breed_Dogs	1	470	4631379	0.250449	Belgium	Europe
LAEK000002	Belgian Laekenois	Breed_Dogs	1	195	4645049	0.375122	Belgium	Europe
LAEK000003	Belgian Laekenois	Breed_Dogs	1	238	4611923	0.291033	Belgium	Europe
LAEK000004	Belgian Laekenois	Breed_Dogs	1	371	4640620	0.39217	Belgium	Europe
LAEK000005	Belgian Laekenois	Breed_Dogs	1	451	4639798	0.367002	Belgium	Europe
LAGO000001	Lagotto Romagnolo	Breed_Dogs	1	1200	4775874	0.243009	Italy	Europe
LAGO000002	Lagotto Romagnolo	Breed_Dogs	1	1369	4720848	0.2258	Italy	Europe
LAGO000004	Lagotto Romagnolo	Breed_Dogs	1	1092	4772995	0.272034	Italy	Europe
LAKE000001	Lakeland Terrier	Breed_Dogs	1	237	4776134	0.489655	United Kingdom	Europe
LAKE000002	Lakeland Terrier	Breed_Dogs	1	239	4761845	0.290217	United Kingdom	Europe
LAKE000003	Lakeland Terrier	Breed_Dogs	1	213	4775528	0.44682	United Kingdom	Europe
LAKE000004	Lakeland Terrier	Breed_Dogs	1	228	4746666	0.48366	United Kingdom	Europe
LAKE000005	Lakeland Terrier	Breed_Dogs	1	241	4774408	0.436763	United Kingdom	Europe
LAKE000006	Lakeland Terrier	Breed_Dogs	1	197	4771498	0.438454	United Kingdom	Europe
LANC000001	Lancashire Heeler	Breed_Dogs	1	458	4752171	0.212899	United Kingdom	Europe
LANC000002	Lancashire Heeler	Breed_Dogs	1	541	4781189	0.322684	United Kingdom	Europe
LANC000003	Lancashire Heeler	Breed_Dogs	1	562	4782764	0.38725	United Kingdom	Europe
LANC000004	Lancashire Heeler	Breed_Dogs	1	1024	4758072	0.210763	United Kingdom	Europe
LANC000005	Lancashire Heeler	Breed_Dogs	1	506	4793276	0.249238	United Kingdom	Europe
LANC000006	Lancashire Heeler	Breed_Dogs	1	657	4734951	0.258988	United Kingdom	Europe
LDSR000001	Landseer	Breed_Dogs	1	380	4748713	0.353369	Canada	Americas
LDSR000002	Landseer	Breed_Dogs	1	472	4750367	0.313526	Canada	Americas
LDSR000003	Landseer	Breed_Dogs	1	490	4750998	0.305157	Canada	Americas
LDSR000004	Landseer	Breed_Dogs	1	495	4765679	0.332572	Canada	Americas
LEON000001	Leonberger	Breed_Dogs	1	261	4662146	0.372582	Germany	Europe
LEON000003	Leonberger	Breed_Dogs	1	144	4632108	0.325143	Germany	Europe
LEON000004	Leonberger	Breed_Dogs	1	447	4639210	0.31423	Germany	Europe
LEON000007	Leonberger	Breed_Dogs	1	297	4663523	0.330474	Germany	Europe
LEON000008	Leonberger	Breed_Dogs	1	285	4702177	0.391691	Germany	Europe
LEON000009	Leonberger	Breed_Dogs	1	275	4690050	0.37417	Germany	Europe
LEON000010	Leonberger	Breed_Dogs	1	288	4701670	0.36794	Germany	Europe
LEON000011	Leonberger	Breed_Dogs	1	391	4660519	0.293277	Germany	Europe
LEON000012	Leonberger	Breed_Dogs	1	281	4675126	0.469805	Germany	Europe
LEON000013	Leonberger	Breed_Dogs	1	309	4677150	0.335103	Germany	Europe
LEON000014	Leonberger	Breed_Dogs	1	274	4639797	0.318314	Germany	Europe
LEOP000002	Catahoula Leopard Dog	Breed_Dogs	1	1143	4742665	0.18142	United States	Americas
LEOP000003	Catahoula Leopard Dog	Breed_Dogs	1	1179	4732798	0.195755	United States	Americas
LEOP000004	Catahoula Leopard Dog	Breed_Dogs	1	489	4720338	0.208599	United States	Americas
LEOP000005	Catahoula Leopard Dog	Breed_Dogs	1	364	4776871	0.172708	United States	Americas
LEOP000008	Catahoula Leopard Dog	Breed_Dogs	1	836	4786198	0.200627	United States	Americas
LEOP000009	Catahoula Leopard Dog	Breed_Dogs	1	972	4763932	0.18592	United States	Americas
LEOP000010	Catahoula Leopard Dog	Breed_Dogs	1	1373	4763290	0.226245	United States	Americas
LHSA000001	Lhasa Apso	Breed_Dogs	2	1472	5088444	0.256653	China	Asia
LHSA000002	Lhasa Apso	Breed_Dogs	2	656	5086905	0.256238	China	Asia
LHSA000003	Lhasa Apso	Breed_Dogs	2	1130	5066292	0.243258	China	Asia
LHSA000004	Lhasa Apso	Breed_Dogs	2	3118	5123053	0.24344	China	Asia
LHSA000005	Lhasa Apso	Breed_Dogs	2	2197	5127540	0.208564	China	Asia
LHSA000006	Lhasa Apso	Breed_Dogs	2	1785	5101797	0.21152	China	Asia
LHSA000007	Lhasa Apso	Breed_Dogs	2	1452	5103492	0.192304	China	Asia
LHSA000008	Lhasa Apso	Breed_Dogs	2	1119	5095887	0.274634	China	Asia
LMUN000001	Large Munsterlander	Breed_Dogs	1	1494	4744538	0.286099	Germany	Europe
LOWC000001	Lowchen	Breed_Dogs	1	401	4788876	0.353233	Germany	Europe
LOWC000002	Lowchen	Breed_Dogs	1	620	4785065	0.325628	Germany	Europe
LOWC000003	Lowchen	Breed_Dogs	1	430	4769650	0.325109	Germany	Europe
LOWC000004	Lowchen	Breed_Dogs	1	558	4771725	0.329856	Germany	Europe
MAAG000001	Magyar Agar	Breed_Dogs	1	731	4694324	0.315079	Hungary	Europe
MAAG000002	Magyar Agar	Breed_Dogs	1	866	4717378	0.218427	Hungary	Europe
MAAG000003	Magyar Agar	Breed_Dogs	1	2534	4756682	0.187776	Hungary	Europe
MAAG000004	Magyar Agar	Breed_Dogs	1	952	4703663	0.231493	Hungary	Europe
MAAG000005	Magyar Agar	Breed_Dogs	1	911	4689685	0.250173	Hungary	Europe
MAAG000006	Magyar Agar	Breed_Dogs	1	833	4747005	0.266742	Hungary	Europe
MALT000001	Maltese	Breed_Dogs	1	1123	4806402	0.23709	Italy	Europe
MALT000002	Maltese	Breed_Dogs	1	686	4787440	0.399453	Italy	Europe
MALT000003	Maltese	Breed_Dogs	1	1189	4790182	0.293913	Italy	Europe
MALT000004	Maltese	Breed_Dogs	1	736	4783355	0.371739	Italy	Europe
MALT000005	Coton de Tulear	Breed_Dogs	1	2385	4782467	0.212232	Madagascar	Africa
MANT000001	Manchester Terrier (Standard)	Breed_Dogs	1	166	4799863	0.451424	United Kingdom	Europe
MANT000002	Manchester Terrier (Standard)	Breed_Dogs	1	197	4780621	0.420369	United Kingdom	Europe
MANT000003	Manchester Terrier (Standard)	Breed_Dogs	1	192	4760010	0.430726	United Kingdom	Europe
MANT000004	Manchester Terrier (Standard)	Breed_Dogs	1	198	4784927	0.429219	United Kingdom	Europe
MANT000005	Manchester Terrier (Standard)	Breed_Dogs	1	269	4807134	0.463285	United Kingdom	Europe
MANT000006	Manchester Terrier (Standard)	Breed_Dogs	1	214	4821766	0.48499	United Kingdom	Europe
MANT000007	Manchester Terrier (Standard)	Breed_Dogs	1	191	4782496	0.505741	United Kingdom	Europe
MANT000008	Manchester Terrier (Standard)	Breed_Dogs	1	204	4805467	0.541232	United Kingdom	Europe
MANT000009	Manchester Terrier (Standard)	Breed_Dogs	1	211	4755983	0.559342	United Kingdom	Europe
MARM000001	Maremma Sheepdog	Breed_Dogs	1	3604	4741944	0.129671	Italy	Europe
MARM000002	Maremma Sheepdog	Breed_Dogs	1	3975	4728420	0.128201	Italy	Europe
MARM000003	Maremma Sheepdog	Breed_Dogs	1	3585	4739107	0.12473	Italy	Europe
MARM000004	Maremma Sheepdog	Breed_Dogs	1	3316	4800352	0.21105	Italy	Europe
MARM000005	Maremma Sheepdog	Breed_Dogs	1	2999	4766669	0.227431	Italy	Europe
MARM000006	Maremma Sheepdog	Breed_Dogs	1	2456	4796983	0.369787	Italy	Europe
MAST000001	Mastiff	Breed_Dogs	1	413	4782586	0.409476	United Kingdom	Europe
MAST000002	Mastiff	Breed_Dogs	1	485	4757685	0.366719	United Kingdom	Europe
MAST000003	Mastiff	Breed_Dogs	1	302	4764937	0.37226	United Kingdom	Europe
MAST000004	Mastiff	Breed_Dogs	1	269	4750565	0.350623	United Kingdom	Europe
MAST000005	Mastiff	Breed_Dogs	1	380	4760904	0.330354	United Kingdom	Europe
MAST000006	Mastiff	Breed_Dogs	1	372	4795415	0.352848	United Kingdom	Europe
MBLT000001	Miniature Bull Terrier	Breed_Dogs	1	247	4723789	0.4883	United Kingdom	Europe
MBLT000002	Miniature Bull Terrier	Breed_Dogs	1	313	4747958	0.498176	United Kingdom	Europe
MBLT000003	Miniature Bull Terrier	Breed_Dogs	1	313	4736032	0.518877	United Kingdom	Europe
MBLT000004	Miniature Bull Terrier	Breed_Dogs	1	267	4744563	0.541617	United Kingdom	Europe
MCUR000001	Mountain Cur	Breed_Dogs	1	1857	4771577	0.14462	United States	Americas
MCUR000004	Mountain Cur	Breed_Dogs	1	1465	4647597	0.136465	United States	Americas
MJMA000001	Majorca Mastiff	Breed_Dogs	1	499	4658836	0.266462	Spain	Europe
MJMA000002	Majorca Mastiff	Breed_Dogs	1	485	4680948	0.34255	Spain	Europe
MJMA000003	Majorca Mastiff	Breed_Dogs	1	638	4699880	0.331188	Spain	Europe
MOBD000001	Mongolian Bankhar Dog	Village_Dogs	2	8680	5005159	0.104017	Mongolia	Asia
MPIN000001	Miniature Pinscher	Breed_Dogs	1	1119	4758828	0.294858	Germany	Europe
MPIN000002	Miniature Pinscher	Breed_Dogs	1	1027	4753931	0.222527	Germany	Europe
MPIN000003	Miniature Pinscher	Breed_Dogs	1	1093	4764297	0.300345	Germany	Europe
MPIN000004	Miniature Pinscher	Breed_Dogs	1	1885	4777902	0.126626	Germany	Europe
MPOO000001	Miniature Poodle	Breed_Dogs	1	1069	4743862	0.224024	Germany	Europe
MSNZ000001	Miniature Schnauzer	Breed_Dogs	1	552	4785540	0.469573	Germany	Europe
MSNZ000002	Miniature Schnauzer	Breed_Dogs	1	745	4784386	0.386533	Germany	Europe
MSNZ000003	Miniature Schnauzer	Breed_Dogs	1	603	4800540	0.384988	Germany	Europe
MSNZ000004	Miniature Schnauzer	Breed_Dogs	1	547	4784695	0.478925	Germany	Europe
MUDI000001	Mudi	Breed_Dogs	1	1381	4665396	0.183567	Hungary	Europe
MUDI000002	Mudi	Breed_Dogs	1	1182	4753453	0.262231	Hungary	Europe
MUDI000003	Mudi	Breed_Dogs	1	1214	4658917	0.236736	Hungary	Europe
MUDI000005	Mudi	Breed_Dogs	1	1866	4718694	0.214145	Hungary	Europe
MUDI000006	Mudi	Breed_Dogs	1	2226	4685604	0.19023	Hungary	Europe
NBUH000001	Norwegian Buhund	Breed_Dogs	1	859	4835809	0.314039	Norway	Europe
NBUH000003	Norwegian Buhund	Breed_Dogs	1	1077	4846071	0.265691	Norway	Europe
NBUH000004	Norwegian Buhund	Breed_Dogs	1	760	4805820	0.334674	Norway	Europe
NBUH000005	Norwegian Buhund	Breed_Dogs	1	746	4829314	0.348959	Norway	Europe
NBUH000006	Norwegian Buhund	Breed_Dogs	1	766	4843083	0.321399	Norway	Europe
NEAP000001	Neapolitan Mastiff	Breed_Dogs	1	787	4798666	0.329771	Italy	Europe
NEAP000002	Neapolitan Mastiff	Breed_Dogs	1	752	4750817	0.323787	Italy	Europe
NEAP000003	Neapolitan Mastiff	Breed_Dogs	1	635	4766245	0.400451	Italy	Europe
NEAP000004	Neapolitan Mastiff	Breed_Dogs	1	876	4754065	0.317354	Italy	Europe
NEAP000005	Neapolitan Mastiff	Breed_Dogs	1	734	4748419	0.322303	Italy	Europe
NELK000001	Norwegian Elkhound	Breed_Dogs	1	1157	4849801	0.316473	Norway	Europe
NELK000002	Norwegian Elkhound	Breed_Dogs	1	767	4865344	0.419778	Norway	Europe
NELK000003	Norwegian Elkhound	Breed_Dogs	1	1076	4861938	0.349853	Norway	Europe
NELK000004	Norwegian Elkhound	Breed_Dogs	1	1127	4860687	0.300642	Norway	Europe
NELK000005	Norwegian Elkhound	Breed_Dogs	1	654	4825788	0.355538	Norway	Europe
NELK000006	Norwegian Elkhound	Breed_Dogs	1	796	4857447	0.362463	Norway	Europe
NELK000007	Norwegian Elkhound	Breed_Dogs	1	694	4847507	0.397323	Norway	Europe
NEWF000001	Newfoundland	Breed_Dogs	1	431	4763685	0.475371	Canada	Americas
NEWF000002	Newfoundland	Breed_Dogs	1	524	4779315	0.342846	Canada	Americas
NEWF000003	Newfoundland	Breed_Dogs	1	716	4754128	0.324606	Canada	Americas
NEWF000004	Newfoundland	Breed_Dogs	1	632	4757916	0.27573	Canada	Americas
NEWF000005	Newfoundland	Breed_Dogs	1	618	4757036	0.286644	Canada	Americas
NEWF000006	Newfoundland	Breed_Dogs	1	655	4727872	0.299276	Canada	Americas
NLUN000001	Norwegian Lundehund	Breed_Dogs	1	321	4813018	0.80795	Norway	Europe
NLUN000002	Norwegian Lundehund	Breed_Dogs	1	57	4815867	0.826524	Norway	Europe
NLUN000003	Norwegian Lundehund	Breed_Dogs	1	182	4811056	0.815851	Norway	Europe
NLUN000004	Norwegian Lundehund	Breed_Dogs	1	131	4809642	0.821553	Norway	Europe
NLUN000005	Norwegian Lundehund	Breed_Dogs	1	161	4823090	0.815556	Norway	Europe
NORB000001	Norrbottenspitz	Breed_Dogs	1	2183	4922784	0.200343	Sweden	Europe
NORB000002	Norrbottenspitz	Breed_Dogs	1	2931	4906927	0.14824	Sweden	Europe
NORB000003	Norrbottenspitz	Breed_Dogs	1	2809	4928760	0.171034	Sweden	Europe
NORB000004	Norrbottenspitz	Breed_Dogs	1	2708	4921101	0.212155	Sweden	Europe
NORB000005	Norrbottenspitz	Breed_Dogs	1	3921	4925356	0.131841	Sweden	Europe
NORF000001	Norfolk Terrier	Breed_Dogs	1	241	4788407	0.490243	United Kingdom	Europe
NORF000002	Norfolk Terrier	Breed_Dogs	1	140	4783301	0.586079	United Kingdom	Europe
NORF000003	Norfolk Terrier	Breed_Dogs	1	267	4766944	0.43708	United Kingdom	Europe
NORF000004	Norfolk Terrier	Breed_Dogs	1	266	4749945	0.392661	United Kingdom	Europe
NORF000005	Norfolk Terrier	Breed_Dogs	1	202	4788389	0.525859	United Kingdom	Europe
NORF000006	Norfolk Terrier	Breed_Dogs	1	205	4778530	0.481709	United Kingdom	Europe
NORF000007	Norfolk Terrier	Breed_Dogs	1	250	4793901	0.444042	United Kingdom	Europe
NOWT000001	Norwich Terrier	Breed_Dogs	1	301	4803788	0.419399	United Kingdom	Europe
NOWT000002	Norwich Terrier	Breed_Dogs	1	260	4813318	0.441284	United Kingdom	Europe
NOWT000003	Norwich Terrier	Breed_Dogs	1	478	4799214	0.492203	United Kingdom	Europe
NOWT000004	Norwich Terrier	Breed_Dogs	1	289	4811754	0.449062	United Kingdom	Europe
NOWT000005	Norwich Terrier	Breed_Dogs	1	225	4804447	0.384062	United Kingdom	Europe
NOWT000006	Norwich Terrier	Breed_Dogs	1	236	4792179	0.467711	United Kingdom	Europe
NSDT000001	Nova Scotia Duck Tolling Retriever	Breed_Dogs	1	897	4755512	0.312681	Canada	Americas
NSDT000002	Nova Scotia Duck Tolling Retriever	Breed_Dogs	1	488	4751367	0.352469	Canada	Americas
NSDT000003	Nova Scotia Duck Tolling Retriever	Breed_Dogs	1	1718	4748045	0.267597	Canada	Americas
NSDT000004	Nova Scotia Duck Tolling Retriever	Breed_Dogs	1	775	4745906	0.294691	Canada	Americas
OEBD000001	Olde English Bulldogge	Breed_Dogs	1	221	4762869	0.42381	United States	Americas
OEBD000002	Olde English Bulldogge	Breed_Dogs	1	407	4731864	0.362746	United States	Americas
OEBD000003	Olde English Bulldogge	Breed_Dogs	1	225	4756931	0.443666	United States	Americas
OLES000001	Old English Sheepdog	Breed_Dogs	1	507	4736536	0.412427	United Kingdom	Europe
OLES000002	Old English Sheepdog	Breed_Dogs	1	748	4724683	0.329945	United Kingdom	Europe
OLES000003	Old English Sheepdog	Breed_Dogs	1	670	4743479	0.300614	United Kingdom	Europe
OLES000004	Old English Sheepdog	Breed_Dogs	1	647	4736025	0.341685	United Kingdom	Europe
OLES000005	Old English Sheepdog	Breed_Dogs	1	622	4698352	0.312232	United Kingdom	Europe
OLES000006	Old English Sheepdog	Breed_Dogs	1	610	4748727	0.28854	United Kingdom	Europe
OLES000007	Old English Sheepdog	Breed_Dogs	1	493	4750893	0.467824	United Kingdom	Europe
OLGS000001	Old German Shepherd	Breed_Dogs	1	200	4172547	0.246087	Germany	Europe
OLGS000002	Old German Shepherd	Breed_Dogs	1	329	4263332	0.230243	Germany	Europe
OLGS000003	Old German Shepherd	Breed_Dogs	1	244	4201826	0.246728	Germany	Europe
OLGS000004	Old German Shepherd	Breed_Dogs	1	212	4209985	0.233138	Germany	Europe
OLGS000005	Old German Shepherd	Breed_Dogs	1	1730	4332500	0.160753	Germany	Europe
OLGS000006	Old German Shepherd	Breed_Dogs	1	327	2949617	0.487059	Germany	Europe
OTTR000001	Otterhound	Breed_Dogs	1	374	4762172	0.392859	United Kingdom	Europe
OTTR000002	Otterhound	Breed_Dogs	1	177	4818419	0.386074	United Kingdom	Europe
OTTR000003	Otterhound	Breed_Dogs	1	186	4794866	0.398973	United Kingdom	Europe
OTTR000004	Otterhound	Breed_Dogs	1	348	4772520	0.42236	United Kingdom	Europe
OTTR000005	Otterhound	Breed_Dogs	1	313	4764085	0.424201	United Kingdom	Europe
OTTR000006	Otterhound	Breed_Dogs	1	265	4756696	0.49145	United Kingdom	Europe
OTTR000007	Otterhound	Breed_Dogs	1	208	4770749	0.449219	United Kingdom	Europe
PAPI000001	Continental Toy Spaniel (Papillon)	Breed_Dogs	1	737	4761001	0.317613	Belgium	Europe
PAPI000002	Continental Toy Spaniel (Papillon)	Breed_Dogs	1	1005	4763825	0.210644	Belgium	Europe
PAPI000003	Continental Toy Spaniel (Papillon)	Breed_Dogs	1	494	4744287	0.291622	Belgium	Europe
PAPI000004	Continental Toy Spaniel (Papillon)	Breed_Dogs	1	513	4763995	0.239483	Belgium	Europe
PAPI000005	Continental Toy Spaniel (Papillon)	Breed_Dogs	1	479	4778283	0.28653	Belgium	Europe
PAPI000006	Continental Toy Spaniel (Papillon)	Breed_Dogs	1	524	4759625	0.28056	Belgium	Europe
PARS000001	Parson Russell Terrier	Breed_Dogs	1	692	4760077	0.2268	United Kingdom	Europe
PARS000002	Parson Russell Terrier	Breed_Dogs	1	904	4761942	0.213279	United Kingdom	Europe
PARS000003	Parson Russell Terrier	Breed_Dogs	1	862	4753918	0.19191	United Kingdom	Europe
PARS000004	Parson Russell Terrier	Breed_Dogs	1	891	4726117	0.186907	United Kingdom	Europe
PARS000005	Parson Russell Terrier	Breed_Dogs	1	799	4754434	0.168715	United Kingdom	Europe
PASP000001	Pont-Audemer spaniel	Breed_Dogs	1	329	4707577	0.234342	France	Europe
PASP000003	Pont-Audemer spaniel	Breed_Dogs	1	345	4738059	0.230841	France	Europe
PASP000004	Pont-Audemer spaniel	Breed_Dogs	1	667	4749394	0.26057	France	Europe
PASP000005	Pont-Audemer spaniel	Breed_Dogs	1	111	4730545	0.150242	France	Europe
PASP000006	Pont-Audemer spaniel	Breed_Dogs	1	365	4756987	0.304672	France	Europe
PASP000007	Pont-Audemer spaniel	Breed_Dogs	1	225	4749279	0.331544	France	Europe
PATR000001	Patterdale Terrier	Breed_Dogs	1	547	4748303	0.309991	United Kingdom	Europe
PATR000002	Patterdale Terrier	Breed_Dogs	1	600	4764271	0.320498	United Kingdom	Europe
PATR000003	Patterdale Terrier	Breed_Dogs	1	520	4742861	0.384938	United Kingdom	Europe
PATR000004	Patterdale Terrier	Breed_Dogs	1	659	4757918	0.222429	United Kingdom	Europe
PBGA000001	Petit Bleu de Gascogne	Breed_Dogs	1	1151	4772199	0.206385	France	Europe
PBGA000002	Petit Bleu de Gascogne	Breed_Dogs	1	947	4779280	0.32089	France	Europe
PBGA000003	Petit Bleu de Gascogne	Breed_Dogs	1	1275	4775112	0.205704	France	Europe
PBGA000004	Petit Bleu de Gascogne	Breed_Dogs	1	1147	4747541	0.191736	France	Europe
PBGR000001	Brussels Griffon (smooth)	Breed_Dogs	1	400	4782815	0.377586	Belgium	Europe
PBGR000002	Brussels Griffon (smooth)	Breed_Dogs	1	520	4770111	0.288146	Belgium	Europe
PBGV000001	Petit Basset Griffon Vendeen	Breed_Dogs	1	286	4790741	0.262677	France	Europe
PBGV000002	Petit Basset Griffon Vendeen	Breed_Dogs	1	406	4780772	0.27354	France	Europe
PBGV000003	Petit Basset Griffon Vendeen	Breed_Dogs	1	345	4770305	0.380463	France	Europe
PBGV000004	Petit Basset Griffon Vendeen	Breed_Dogs	1	307	4804481	0.2867	France	Europe
PBGV000005	Petit Basset Griffon Vendeen	Breed_Dogs	1	278	4804514	0.337844	France	Europe
PBGV000006	Petit Basset Griffon Vendeen	Breed_Dogs	1	297	4778770	0.290637	France	Europe
PBGV000007	Petit Basset Griffon Vendeen	Breed_Dogs	1	256	4770463	0.298507	France	Europe
PBGV000008	Petit Basset Griffon Vendeen	Breed_Dogs	1	385	4778958	0.346999	France	Europe
PBGV000009	Petit Basset Griffon Vendeen	Breed_Dogs	1	318	4765439	0.28611	France	Europe
PBGV000010	Petit Basset Griffon Vendeen	Breed_Dogs	1	344	4766775	0.278411	France	Europe
PBGV000012	Petit Basset Griffon Vendeen	Breed_Dogs	1	692	4784733	0.319133	France	Europe
PEKE000001	Pekingese	Breed_Dogs	2	604	5024648	0.327236	China	Asia
PEKE000002	Pekingese	Breed_Dogs	2	648	5013738	0.346854	China	Asia
PEKE000003	Pekingese	Breed_Dogs	2	516	5007508	0.342578	China	Asia
PEMB000001	Pembroke Welsh Corgi	Breed_Dogs	1	1210	4772118	0.385851	United Kingdom	Europe
PERH000001	Peruvian Hairless	Breed_Dogs	1	1757	4751951	0.266601	Peru	Americas
PERH000002	Peruvian Hairless	Breed_Dogs	1	981	4679864	0.187509	Peru	Americas
PERH000003	Peruvian Hairless	Breed_Dogs	1	1053	4717650	0.191789	Peru	Americas
PERH000004	Peruvian Hairless	Breed_Dogs	1	2380	4676924	0.137898	Peru	Americas
PERH000005	Peruvian Hairless	Breed_Dogs	1	2123	4729924	0.134845	Peru	Americas
PHAL000001	Continental Toy Spaniel (Phalene)	Breed_Dogs	1	554	4756687	0.219701	Belgium	Europe
PHAL000002	Continental Toy Spaniel (Phalene)	Breed_Dogs	1	658	4767049	0.255211	Belgium	Europe
PHAL000003	Continental Toy Spaniel (Phalene)	Breed_Dogs	1	645	4770851	0.262684	Belgium	Europe
PHAL000004	Continental Toy Spaniel (Phalene)	Breed_Dogs	1	859	4775631	0.192627	Belgium	Europe
PHAL000005	Continental Toy Spaniel (Phalene)	Breed_Dogs	1	529	4775180	0.252298	Belgium	Europe
PHAR000001	Pharaoh Hound	Breed_Dogs	1	573	4779009	0.38531	Malta	Europe
PHAR000002	Pharaoh Hound	Breed_Dogs	1	263	4788847	0.408153	Malta	Europe
PHAR000003	Pharaoh Hound	Breed_Dogs	1	465	4773373	0.338861	Malta	Europe
PHAR000004	Pharaoh Hound	Breed_Dogs	1	653	4783940	0.341525	Malta	Europe
PHAR000005	Pharaoh Hound	Breed_Dogs	1	417	4786222	0.425986	Malta	Europe
PHAR000006	Pharaoh Hound	Breed_Dogs	1	1012	4814258	0.29857	Malta	Europe
PISH000001	Picardy Shepherd	Breed_Dogs	1	357	4251889	0.56649	France	Europe
PISH000002	Picardy Shepherd	Breed_Dogs	1	117	4186553	0.547621	France	Europe
PISH000003	Picardy Shepherd	Breed_Dogs	1	111	4201445	0.490875	France	Europe
PISH000004	Picardy Shepherd	Breed_Dogs	1	229	4219099	0.492605	France	Europe
PISH000005	Picardy Shepherd	Breed_Dogs	1	122	4305490	0.526908	France	Europe
PISH000006	Picardy Shepherd	Breed_Dogs	1	176	4304016	0.52989	France	Europe
PISP000001	Picardy Spaniel	Breed_Dogs	1	270	4743961	0.280763	France	Europe
PISP000002	Picardy Spaniel	Breed_Dogs	1	513	4724079	0.242609	France	Europe
PISP000003	Picardy Spaniel	Breed_Dogs	1	382	4757665	0.327984	France	Europe
PISP000004	Picardy Spaniel	Breed_Dogs	1	297	4738970	0.285993	France	Europe
PITB000001	Pit Bull Terrier	Mixed/Other	1	1032	4714959	0.210137	United States	Americas
PITB000002	Pit Bull Terrier	Mixed/Other	1	806	4733915	0.244573	United States	Americas
PLOT000001	Plott Hound	Breed_Dogs	1	1652	4769190	0.201361	United States	Americas
POLG000001	Polish Greyhound	Breed_Dogs	1	1002	4759774	0.172447	Poland	Europe
POLG000002	Polish Greyhound	Breed_Dogs	1	727	4814624	0.199985	Poland	Europe
POLG000003	Polish Greyhound	Breed_Dogs	1	741	4830480	0.200742	Poland	Europe
POLG000004	Polish Greyhound	Breed_Dogs	1	2461	4784287	0.14857	Poland	Europe
POLG000005	Polish Greyhound	Breed_Dogs	1	1452	4877731	0.207448	Poland	Europe
POLG000006	Polish Greyhound	Breed_Dogs	1	1079	4899431	0.292065	Poland	Europe
POLG000007	Polish Greyhound	Breed_Dogs	1	1158	4837906	0.218705	Poland	Europe
POLS000001	Polish Lowland Sheepdog	Breed_Dogs	1	989	4774844	0.320926	Poland	Europe
POLS000002	Polish Lowland Sheepdog	Breed_Dogs	1	887	4782852	0.369982	Poland	Europe
POLS000003	Polish Tatra Sheepdog	Breed_Dogs	1	420	4804677	0.256201	Poland	Europe
POLS000004	Polish Tatra Sheepdog	Breed_Dogs	1	448	4775460	0.264264	Poland	Europe
POMR000002	Pomeranian	Breed_Dogs	1	537	4781353	0.285756	Germany	Europe
POMR000003	Pomeranian	Breed_Dogs	1	556	4762546	0.245678	Germany	Europe
POMR000004	Pomeranian	Breed_Dogs	1	749	4797174	0.202777	Germany	Europe
POMR000005	Pomeranian	Breed_Dogs	1	574	4783459	0.229952	Germany	Europe
POMR000006	Pomeranian	Breed_Dogs	1	711	4779087	0.198404	Germany	Europe
POMR000007	Pomeranian	Breed_Dogs	1	646	4756335	0.191338	Germany	Europe
POMR000008	Pomeranian	Breed_Dogs	1	522	4759609	0.181237	Germany	Europe
POOD000001	Poodle	Breed_Dogs	1	1208	4768775	0.235247	Germany	Europe
POPT000001	Portuguese Pointer	Breed_Dogs	1	1793	4778631	0.320194	Portugal	Europe
PORC000001	Porcelaine	Breed_Dogs	1	1308	4786179	0.392738	France	Europe
POSD000001	Portuguese Sheepdog	Breed_Dogs	1	932	4755947	0.250846	Portugal	Europe
POSD000002	Portuguese Sheepdog	Breed_Dogs	1	574	4748772	0.336057	Portugal	Europe
POSD000003	Portuguese Sheepdog	Breed_Dogs	1	831	4673823	0.285759	Portugal	Europe
POSD000004	Portuguese Sheepdog	Breed_Dogs	1	1110	4735011	0.275643	Portugal	Europe
POSD000005	Portuguese Sheepdog	Breed_Dogs	1	1306	4745287	0.24379	Portugal	Europe
POSD000006	Portuguese Sheepdog	Breed_Dogs	1	1876	4718390	0.198659	Portugal	Europe
POSH000001	Posavac Hound	Breed_Dogs	1	4702	4827401	0.143753	Croatia	Europe
PPOD000001	Portuguese Podengo	Breed_Dogs	1	2764	4794289	0.378485	Portugal	Europe
PPOD000002	Portuguese Podengo	Breed_Dogs	1	3575	4729622	0.216732	Portugal	Europe
PPOD000003	Portuguese Podengo Pequeno	Breed_Dogs	1	2093	4778300	0.17299	Portugal	Europe
PPOD000004	Portuguese Podengo Pequeno	Breed_Dogs	1	1865	4786656	0.200798	Portugal	Europe
PPOP000001	Portuguese Podengo Pequeno	Breed_Dogs	1	1697	4778995	0.227711	Portugal	Europe
PPOP000002	Portuguese Podengo Pequeno	Breed_Dogs	1	1891	4748021	0.223131	Portugal	Europe
PRKR000001	Prague Ratter	Breed_Dogs	1	1079	4770443	0.208738	Czech Republic	Europe
PRKR000002	Prague Ratter	Breed_Dogs	1	989	4783590	0.226855	Czech Republic	Europe
PRKR000003	Prague Ratter	Breed_Dogs	1	847	4739854	0.231499	Czech Republic	Europe
PRKR000004	Prague Ratter	Breed_Dogs	1	851	4780811	0.240276	Czech Republic	Europe
PRKR000005	Prague Ratter	Breed_Dogs	1	1003	4752654	0.259134	Czech Republic	Europe
PTAS000001	Polish Tatra Sheepdog	Breed_Dogs	1	983	4789801	0.287712	Poland	Europe
PTAS000002	Polish Tatra Sheepdog	Breed_Dogs	1	1011	4787038	0.213853	Poland	Europe
PTAS000003	Polish Tatra Sheepdog	Breed_Dogs	1	874	4763815	0.243716	Poland	Europe
PTAS000004	Polish Tatra Sheepdog	Breed_Dogs	1	995	4820214	0.238172	Poland	Europe
PTAS000005	Polish Tatra Sheepdog	Breed_Dogs	1	845	4792632	0.235619	Poland	Europe
PTAS000006	Polish Tatra Sheepdog	Breed_Dogs	1	884	4778838	0.301114	Poland	Europe
PTWD000001	Portuguese Water Dog	Breed_Dogs	1	681	4593051	0.444683	Portugal	Europe
PTWD000002	Portuguese Water Dog	Breed_Dogs	1	485	4677866	0.274664	Portugal	Europe
PTWD000003	Portuguese Water Dog	Breed_Dogs	1	332	4642479	0.366894	Portugal	Europe
PTWD000004	Portuguese Water Dog	Breed_Dogs	1	634	4635464	0.215016	Portugal	Europe
PTWD000005	Portuguese Water Dog	Breed_Dogs	1	764	4674956	0.273499	Portugal	Europe
PTWD000006	Portuguese Water Dog	Breed_Dogs	1	521	4602115	0.292962	Portugal	Europe
PTWD000007	Portuguese Water Dog	Breed_Dogs	1	994	4727388	0.201796	Portugal	Europe
PTWD000008	Portuguese Water Dog	Breed_Dogs	1	783	4632304	0.21027	Portugal	Europe
PUDL000001	Pudelpointer	Breed_Dogs	1	720	4785449	0.264389	Germany	Europe
PUDL000002	Pudelpointer	Breed_Dogs	1	592	4749296	0.254606	Germany	Europe
PUDL000003	Pudelpointer	Breed_Dogs	1	657	4754008	0.299737	Germany	Europe
PUGD000001	Pug	Breed_Dogs	1	1010	4802942	0.475221	China	Asia
PULI000001	Puli	Breed_Dogs	1	1225	4800342	0.307797	Hungary	Europe
PULI000002	Puli	Breed_Dogs	1	1732	4790920	0.223817	Hungary	Europe
PULI000003	Puli	Breed_Dogs	1	1406	4782165	0.238603	Hungary	Europe
PULI000004	Puli	Breed_Dogs	1	1583	4778337	0.303724	Hungary	Europe
PULI000005	Puli	Breed_Dogs	1	1480	4774196	0.185936	Hungary	Europe
PULI000006	Puli	Breed_Dogs	1	1432	4813842	0.228045	Hungary	Europe
PUMI000001	Pumi	Breed_Dogs	1	1077	4731371	0.196127	Hungary	Europe
PUMI000002	Pumi	Breed_Dogs	1	1183	4759609	0.191013	Hungary	Europe
PUMI000003	Pumi	Breed_Dogs	1	1211	4722489	0.234587	Hungary	Europe
PUMI000004	Pumi	Breed_Dogs	1	1155	4756116	0.215796	Hungary	Europe
PUMI000005	Pumi	Breed_Dogs	1	1280	4773071	0.29155	Hungary	Europe
PUMI000006	Pumi	Breed_Dogs	1	1832	4750492	0.142308	Hungary	Europe
PYMF000001	Pyrenean Mastiff	Breed_Dogs	1	662	4764058	0.258651	Spain	Europe
PYMF000002	Pyrenean Mastiff	Breed_Dogs	1	678	4786191	0.221619	Spain	Europe
PYMF000003	Pyrenean Mastiff	Breed_Dogs	1	608	4774272	0.220402	Spain	Europe
PYMF000004	Pyrenean Mastiff	Breed_Dogs	1	626	4754392	0.2696	Spain	Europe
PYMF000005	Pyrenean Mastiff	Breed_Dogs	1	564	4778089	0.318243	Spain	Europe
PYMF000006	Pyrenean Mastiff	Breed_Dogs	1	468	4762286	0.262439	Spain	Europe
PYSH000001	Pyrenean Shepherd	Breed_Dogs	1	608	4749900	0.320536	France	Europe
PYSH000002	Great Pyrenees	Breed_Dogs	1	1469	4789421	0.378968	France	Europe
PYSH000003	Pyrenean Shepherd	Breed_Dogs	1	592	4763157	0.286931	France	Europe
PYSH000004	Pyrenean Shepherd	Breed_Dogs	1	707	4729107	0.35485	France	Europe
PYSH000005	Pyrenean Shepherd	Breed_Dogs	1	326	4780013	0.526556	France	Europe
PYSH000006	Pyrenean Shepherd	Breed_Dogs	1	480	4734029	0.340189	France	Europe
PYSH000007	Pyrenean Shepherd	Breed_Dogs	1	865	4742822	0.267118	France	Europe
PYSH000008	Pyrenean Shepherd	Breed_Dogs	1	507	4752531	0.203519	France	Europe
PYSH000009	Pyrenean Shepherd	Breed_Dogs	1	1113	4718073	0.159355	France	Europe
PYSH000010	Pyrenean Shepherd	Breed_Dogs	1	1063	4738562	0.196126	France	Europe
PYSH000011	Pyrenean Shepherd	Breed_Dogs	1	712	4747277	0.31042	France	Europe
PYSH000012	Pyrenean Shepherd	Breed_Dogs	1	1399	4730373	0.22694	France	Europe
RABA000002	Ratonero Bodeguero Andaluz	Breed_Dogs	1	2097	4793970	0.200314	Spain	Europe
RATT000001	Rat Terrier	Breed_Dogs	1	1296	4778376	0.189623	United States	Americas
RATT000002	Rat Terrier	Breed_Dogs	1	2760	4824100	0.205547	United States	Americas
REDB000001	Redbone Coonhound	Breed_Dogs	1	1497	4746115	0.194941	United States	Americas
REDB000002	Redbone Coonhound	Breed_Dogs	1	1408	4755811	0.216028	United States	Americas
REDB000003	Redbone Coonhound	Breed_Dogs	1	1380	4777046	0.20468	United States	Americas
RHOD000001	Rhodesian Ridgeback	Breed_Dogs	1	1334	4794438	0.331203	South Africa	Africa
RHOD000002	Rhodesian Ridgeback	Breed_Dogs	1	1598	4758467	0.255327	South Africa	Africa
ROOS000001	Teddy Roosevelt Terrier	Breed_Dogs	1	1807	4745893	0.142248	United States	Americas
ROOS000002	Teddy Roosevelt Terrier	Breed_Dogs	1	2038	4771292	0.152866	United States	Americas
RTOY000001	Russian Toy	Breed_Dogs	1	2636	4813041	0.1293	Russia	Europe
RTOY000002	Russian Toy	Breed_Dogs	1	2336	4768113	0.157271	Russia	Europe
RUSH000001	Russian Hound	Breed_Dogs	1	1529	4785336	0.223896	Russia	Europe
RUSH000002	Russian Hound	Breed_Dogs	1	1993	4810411	0.203958	Russia	Europe
RUSH000003	Russian Hound	Breed_Dogs	1	2060	4813521	0.217596	Russia	Europe
RUSH000004	Russian Hound	Breed_Dogs	1	1243	4792451	0.27601	Russia	Europe
RUSH000005	Russian Hound	Breed_Dogs	1	1724	4815909	0.212422	Russia	Europe
RUSH000006	Russian Hound	Breed_Dogs	1	1421	4801494	0.241445	Russia	Europe
RUTY000001	Russian Toy	Breed_Dogs	1	2203	4774095	0.160653	Russia	Europe
RUTY000002	Russian Toy	Breed_Dogs	1	1833	4781502	0.152213	Russia	Europe
RUTY000003	Russian Toy	Breed_Dogs	1	793	4726014	0.411512	Russia	Europe
RUTY000004	Russian Toy	Breed_Dogs	1	1355	4771098	0.250198	Russia	Europe
RWSE000001	Irish Red and White Setter	Breed_Dogs	1	909	4765184	0.318351	Ireland	Europe
SAAR000001	Saarloos Wolfdog	Breed_Dogs	4	1865	4600525	0.339463	Netherlands	Europe
SAAR000002	Saarloos Wolfdog	Breed_Dogs	4	60247	5087813	0.238862	Netherlands	Europe
SAAR000003	Saarloos Wolfdog	Breed_Dogs	4	1982	4588222	0.36112	Netherlands	Europe
SAAR000004	Saarloos Wolfdog	Breed_Dogs	4	22770	4779546	0.312833	Netherlands	Europe
SALU000003	Saluki	Breed_Dogs	2	7664	5103940	0.212955	Iran	Asia
SAMO000001	Samoyed	Breed_Dogs	2	1986	5003344	0.273638	Russia	Europe
SAMO000002	Samoyed	Breed_Dogs	2	1760	5091205	0.433543	Russia	Europe
SAMO000003	Samoyed	Breed_Dogs	2	1502	5066084	0.411096	Russia	Europe
SAMO000004	Samoyed	Breed_Dogs	2	2416	5032595	0.262279	Russia	Europe
SARP000001	Sarplaninac	Breed_Dogs	2	5051	4911322	0.139207	Macedonia	Europe
SARP000002	Sarplaninac	Breed_Dogs	2	4657	4915518	0.1791	Macedonia	Europe
SARP000003	Sarplaninac	Breed_Dogs	2	5503	4917307	0.17694	Macedonia	Europe
SARP000004	Sarplaninac	Breed_Dogs	2	4243	4889673	0.186101	Macedonia	Europe
SCPD000001	Schapendoes	Breed_Dogs	1	495	4733151	0.335302	Netherlands	Europe
SCPD000002	Schapendoes	Breed_Dogs	1	508	4722101	0.378121	Netherlands	Europe
SCPD000003	Schapendoes	Breed_Dogs	1	519	4745038	0.384486	Netherlands	Europe
SCPD000004	Schapendoes	Breed_Dogs	1	511	4738673	0.341522	Netherlands	Europe
SEAL000002	Sealyham Terrier	Breed_Dogs	1	280	4764033	0.473477	United Kingdom	Europe
SEAL000003	Sealyham Terrier	Breed_Dogs	1	220	4779736	0.427632	United Kingdom	Europe
SEAL000004	Sealyham Terrier	Breed_Dogs	1	760	4758859	0.332437	United Kingdom	Europe
SEAL000005	Sealyham Terrier	Breed_Dogs	1	687	4756579	0.369766	United Kingdom	Europe
SEAL000006	Sealyham Terrier	Breed_Dogs	1	170	4777054	0.381653	United Kingdom	Europe
SEAL000007	Sealyham Terrier	Breed_Dogs	1	253	4777247	0.416199	United Kingdom	Europe
SEAL000008	Sealyham Terrier	Breed_Dogs	1	288	4756194	0.447306	United Kingdom	Europe
SEAL000009	Sealyham Terrier	Breed_Dogs	1	219	4764581	0.394446	United Kingdom	Europe
SEAL000010	Sealyham Terrier	Breed_Dogs	1	164	4768608	0.411421	United Kingdom	Europe
SGGO000001	Segugio Italiano	Breed_Dogs	1	1930	4742064	0.161503	Italy	Europe
SGGO000002	Segugio Italiano	Breed_Dogs	1	1790	4812486	0.19769	Italy	Europe
SGGO000003	Segugio Italiano	Breed_Dogs	1	2083	4773489	0.168473	Italy	Europe
SGGO000004	Segugio Italiano	Breed_Dogs	1	2047	4746635	0.193566	Italy	Europe
SHAR000002	Chinese Shar-Pei	Breed_Dogs	3	3033	5543618	0.181696	China	Asia
SHAR000003	Chinese Shar-Pei	Breed_Dogs	3	3093	5507989	0.201473	China	Asia
SHIB000001	Shiba Inu	Breed_Dogs	3	6820	5566585	0.253193	Japan	Asia
SHIB000002	Shiba Inu	Breed_Dogs	3	5675	5523120	0.31305	Japan	Asia
SHIB000003	Shiba Inu	Breed_Dogs	3	6685	5559735	0.280999	Japan	Asia
SHIH000001	Shih Tzu	Breed_Dogs	2	839	5046635	0.286316	China	Asia
SHIH000002	Shih Tzu	Breed_Dogs	2	890	5004191	0.291341	China	Asia
SHIH000003	Shih Tzu	Breed_Dogs	2	1059	5011175	0.206358	China	Asia
SHIH000004	Shih Tzu	Breed_Dogs	2	767	5017707	0.315125	China	Asia
SHIH000005	Shih Tzu	Breed_Dogs	2	618	5023062	0.346573	China	Asia
SHIL000001	Shiloh Shepherd	Breed_Dogs	1	5816	3475373	0.413461	United States	Americas
SIKU000001	Shikoku	Breed_Dogs	3	11728	5725420	0.407823	Japan	Asia
SILK000001	Silky Terrier	Breed_Dogs	1	858	4714228	0.25941	Australia	Oceania
SILK000002	Silky Terrier	Breed_Dogs	1	1080	4756313	0.287349	Australia	Oceania
SILK000003	Silky Terrier	Breed_Dogs	1	540	4751306	0.441237	Australia	Oceania
SILK000004	Skye Terrier	Breed_Dogs	1	722	4739234	0.451881	United Kingdom	Europe
SILK000005	Skye Terrier	Breed_Dogs	1	752	4721156	0.499656	United Kingdom	Europe
SKIP000001	Schipperke	Breed_Dogs	1	580	4798120	0.359276	Belgium	Europe
SKIP000002	Rhodesian Ridgeback	Breed_Dogs	1	992	4745609	0.364253	South Africa	Africa
SKIP000003	Schipperke	Breed_Dogs	1	1045	4796753	0.274945	Belgium	Europe
SKIP000004	Schipperke	Breed_Dogs	1	848	4806750	0.293479	Belgium	Europe
SKIP000005	Schipperke	Breed_Dogs	1	650	4809876	0.372779	Belgium	Europe
SKIP000006	Schipperke	Breed_Dogs	1	573	4803199	0.408677	Belgium	Europe
SKWH000001	Silken Windhound	Breed_Dogs	1	990	4766750	0.337899	United States	Americas
SKWH000002	Silken Windhound	Breed_Dogs	1	1193	4766605	0.305282	United States	Americas
SKYE000003	Skye Terrier	Breed_Dogs	1	1260	4760159	0.535444	United Kingdom	Europe
SLAP000001	Swedish Lapphund	Breed_Dogs	2	2506	4878364	0.267319	Sweden	Europe
SLAP000002	Swedish Lapphund	Breed_Dogs	1	1971	4843988	0.2678	Sweden	Europe
SLAP000003	Swedish Lapphund	Breed_Dogs	1	2045	4869337	0.286325	Sweden	Europe
SLCU000001	Slovak Cuvac	Breed_Dogs	1	434	4764710	0.271328	Slovakia	Europe
SLCU000002	Slovak Cuvac	Breed_Dogs	1	699	4759461	0.267718	Slovakia	Europe
SLCU000003	Slovak Cuvac	Breed_Dogs	1	741	4775740	0.234664	Slovakia	Europe
SLCU000004	Slovak Cuvac	Breed_Dogs	1	881	4777811	0.229643	Slovakia	Europe
SLCU000005	Slovak Cuvac	Breed_Dogs	1	694	4749099	0.265232	Slovakia	Europe
SLCU000006	Slovak Cuvac	Breed_Dogs	1	701	4771582	0.270467	Slovakia	Europe
SLCU000007	Slovak Cuvac	Breed_Dogs	1	657	4764949	0.270657	Slovakia	Europe
SLKV000001	Slovensky Kopov	Breed_Dogs	1	1382	4775961	0.323598	Slovakia	Europe
SLKV000002	Slovensky Kopov	Breed_Dogs	1	1642	4749906	0.288556	Slovakia	Europe
SLOU000002	Sloughi	Breed_Dogs	1	7123	4913862	0.134176	Morocco	Africa
SLOU000003	Sloughi	Breed_Dogs	1	7904	4935084	0.184612	Morocco	Africa
SLWP000001	Slovakian Wirehaired Pointer	Breed_Dogs	1	358	4755840	0.331733	Slovakia	Europe
SLWP000002	Slovakian Wirehaired Pointer	Breed_Dogs	1	396	4758766	0.315139	Slovakia	Europe
SLWP000003	Slovakian Wirehaired Pointer	Breed_Dogs	1	368	4780954	0.252291	Slovakia	Europe
SLWP000004	Slovakian Wirehaired Pointer	Breed_Dogs	1	410	4777106	0.218554	Slovakia	Europe
SMCD000001	Saint Miguel Cattle Dog	Breed_Dogs	1	2125	4742578	0.194486	Portugal	Europe
SMCD000002	Saint Miguel Cattle Dog	Breed_Dogs	1	2252	4771626	0.184807	Portugal	Europe
SMFX000001	Smooth Fox Terrier	Breed_Dogs	1	277	4770234	0.417052	United Kingdom	Europe
SMFX000002	Smooth Fox Terrier	Breed_Dogs	1	258	4772209	0.429429	United Kingdom	Europe
SMFX000003	Smooth Fox Terrier	Breed_Dogs	1	134	4741109	0.469338	United Kingdom	Europe
SMFX000004	Smooth Fox Terrier	Breed_Dogs	1	113	4764066	0.453335	United Kingdom	Europe
SMFX000005	Smooth Fox Terrier	Breed_Dogs	1	83	4777170	0.395331	United Kingdom	Europe
SMSH000001	Small Swiss Hound	Breed_Dogs	1	274	4780467	0.343508	Switzerland	Europe
SMSH000002	Small Swiss Hound	Breed_Dogs	1	249	4775272	0.280638	Switzerland	Europe
SMSH000003	Small Swiss Hound	Breed_Dogs	1	272	4750269	0.213019	Switzerland	Europe
SMSH000004	Small Swiss Hound	Breed_Dogs	1	600	4767807	0.158608	Switzerland	Europe
SMSH000005	Small Swiss Hound	Breed_Dogs	1	389	4799715	0.322162	Switzerland	Europe
SMSH000006	Small Swiss Hound	Breed_Dogs	1	439	4759815	0.241279	Switzerland	Europe
SMSH000007	Small Swiss Hound	Breed_Dogs	1	346	4779736	0.339291	Switzerland	Europe
SMSH000008	Small Swiss Hound	Breed_Dogs	1	353	4770149	0.482621	Switzerland	Europe
SMSH000009	Small Swiss Hound	Breed_Dogs	1	532	4792711	0.402313	Switzerland	Europe
SMSH000010	Small Swiss Hound	Breed_Dogs	1	124	4758584	0.507442	Switzerland	Europe
SMSH000011	Small Swiss Hound	Breed_Dogs	1	405	4775467	0.267708	Switzerland	Europe
SMSH000012	Small Swiss Hound	Breed_Dogs	1	308	4786373	0.434241	Switzerland	Europe
SPEI000001	Chinese Shar-Pei	Breed_Dogs	3	3084	5547815	0.182135	China	Asia
SPEI000002	Chinese Shar-Pei	Breed_Dogs	3	3535	5505998	0.145333	China	Asia
SPEI000003	Chinese Shar-Pei	Breed_Dogs	3	3680	5585881	0.206479	China	Asia
SPEI000004	Chinese Shar-Pei	Breed_Dogs	3	3782	5578492	0.16031	China	Asia
SPEI000005	Chinese Shar-Pei	Breed_Dogs	3	3541	5588377	0.180318	China	Asia
SPEI000006	Chinese Shar-Pei	Breed_Dogs	3	4241	5529177	0.140633	China	Asia
SPIN000001	Spinone Italiano	Breed_Dogs	1	788	4772997	0.220855	Italy	Europe
SPIN000002	Spinone Italiano	Breed_Dogs	1	897	4764290	0.223278	Italy	Europe
SPIN000004	Spinone Italiano	Breed_Dogs	1	436	4759564	0.235441	Italy	Europe
SPIN000005	Spinone Italiano	Breed_Dogs	1	685	4772376	0.318	Italy	Europe
SPIN000006	Spinone Italiano	Breed_Dogs	1	530	4765218	0.24388	Italy	Europe
SPIN000007	Spinone Italiano	Breed_Dogs	1	1136	4754207	0.228814	Italy	Europe
SPIN000008	Spinone Italiano	Breed_Dogs	1	1045	4782795	0.255237	Italy	Europe
SPMT000001	Spanish Mastiff	Breed_Dogs	1	2596	4777059	0.163642	Spain	Europe
SPMT000002	Spanish Mastiff	Breed_Dogs	1	2017	4819474	0.195876	Spain	Europe
SPMT000003	Spanish Mastiff	Breed_Dogs	1	2049	4802172	0.210843	Spain	Europe
SPMT000004	Spanish Mastiff	Breed_Dogs	1	2352	4804612	0.2082	Spain	Europe
SPMT000005	Spanish Mastiff	Breed_Dogs	1	2494	4788312	0.207856	Spain	Europe
SPMT000006	Spanish Mastiff	Breed_Dogs	1	2023	4786125	0.235581	Spain	Europe
SPWD000001	Spanish Water Dog	Breed_Dogs	1	2153	4743163	0.183185	Spain	Europe
SPWD000002	Spanish Water Dog	Breed_Dogs	1	3802	4775702	0.227613	Spain	Europe
SPWD000003	Spanish Water Dog	Breed_Dogs	1	1994	4764949	0.202555	Spain	Europe
SPWD000004	Spanish Water Dog	Breed_Dogs	1	1642	4755613	0.309893	Spain	Europe
SRAB000001	Sarabi	Breed_Dogs	2	5574	5049467	0.188764	Iran	Asia
SRAB000002	Sarabi	Breed_Dogs	2	6549	5076264	0.182682	Iran	Asia
SROV000001	South Russian Ovcharka	Breed_Dogs	2	3684	4841019	0.196139	Russia	Europe
SROV000003	South Russian Ovcharka	Breed_Dogs	1	2147	4774603	0.208177	Russia	Europe
SROV000004	South Russian Ovcharka	Breed_Dogs	1	1967	4800284	0.266934	Russia	Europe
SSHP000001	Shetland Sheepdog	Breed_Dogs	1	601	4775191	0.465387	United Kingdom	Europe
SSHP000002	Shetland Sheepdog	Breed_Dogs	1	625	4761285	0.456682	United Kingdom	Europe
SSHP000003	Shetland Sheepdog	Breed_Dogs	1	907	4761128	0.33225	United Kingdom	Europe
SSHP000004	Shetland Sheepdog	Breed_Dogs	1	1039	4739475	0.342716	United Kingdom	Europe
SSNZ000001	Standard Schnauzer	Breed_Dogs	1	1521	4768627	0.288427	Germany	Europe
STAF000001	Staffordshire Bull Terrier	Breed_Dogs	1	533	4735760	0.363216	United Kingdom	Europe
STAF000002	Staffordshire Bull Terrier	Breed_Dogs	1	567	4733283	0.321593	United Kingdom	Europe
STAF000003	Staffordshire Bull Terrier	Breed_Dogs	1	492	4715034	0.399698	United Kingdom	Europe
STAF000004	Staffordshire Bull Terrier	Breed_Dogs	1	583	4738302	0.338839	United Kingdom	Europe
STAF000005	Staffordshire Bull Terrier	Breed_Dogs	1	453	4733627	0.392522	United Kingdom	Europe
STAF000006	Staffordshire Bull Terrier	Breed_Dogs	1	505	4701662	0.353174	United Kingdom	Europe
STBD000001	Saint Bernard	Breed_Dogs	1	458	4717108	0.350729	Switzerland	Europe
STBD000002	Saint Bernard	Breed_Dogs	1	512	4741167	0.362457	Switzerland	Europe
STBD000003	Saint Bernard	Breed_Dogs	1	424	4744763	0.37489	Switzerland	Europe
STBD000004	Saint Bernard	Breed_Dogs	1	257	4722833	0.289546	Switzerland	Europe
STBD000005	Saint Bernard	Breed_Dogs	1	324	4730453	0.317116	Switzerland	Europe
STBD000006	Saint Bernard	Breed_Dogs	1	255	4734730	0.350524	Switzerland	Europe
STBD000007	Saint Bernard	Breed_Dogs	1	483	4733030	0.334972	Switzerland	Europe
STBD000008	Saint Bernard	Breed_Dogs	1	454	4723549	0.265159	Switzerland	Europe
STBD000009	Saint Bernard	Breed_Dogs	1	313	4710336	0.331008	Switzerland	Europe
STBD000010	Saint Bernard	Breed_Dogs	1	328	4739580	0.302668	Switzerland	Europe
STBD000011	Saint Bernard	Breed_Dogs	1	297	4733656	0.323608	Switzerland	Europe
STBD000012	Saint Bernard	Breed_Dogs	1	242	4715873	0.361905	Switzerland	Europe
STBD000013	Saint Bernard	Breed_Dogs	1	248	4716004	0.230472	Switzerland	Europe
STBY000001	Stabyhoun	Breed_Dogs	1	804	4735516	0.396929	Netherlands	Europe
STBY000002	Stabyhoun	Breed_Dogs	1	554	4716161	0.368639	Netherlands	Europe
STBY000003	Stabyhoun	Breed_Dogs	1	453	4749502	0.407704	Netherlands	Europe
STBY000004	Stabyhoun	Breed_Dogs	1	389	4722963	0.415929	Netherlands	Europe
SUSP000001	Saint-Usuge Spaniel	Breed_Dogs	1	570	4749945	0.216476	France	Europe
SUSX000001	Sussex Spaniel	Breed_Dogs	1	209	4714170	0.593901	United Kingdom	Europe
SUSX000002	Sussex Spaniel	Breed_Dogs	1	104	4703643	0.584434	United Kingdom	Europe
SUSX000003	Sussex Spaniel	Breed_Dogs	1	250	4684039	0.613813	United Kingdom	Europe
SUSX000004	Sussex Spaniel	Breed_Dogs	1	143	4705021	0.527146	United Kingdom	Europe
SUSX000005	Sussex Spaniel	Breed_Dogs	1	185	4735147	0.566162	United Kingdom	Europe
SUSX000006	Sussex Spaniel	Breed_Dogs	1	88	4738302	0.604317	United Kingdom	Europe
SVAL000007	Swedish Vallhund	Breed_Dogs	1	830	4795997	0.348135	Sweden	Europe
SVAL000008	Swedish Vallhund	Breed_Dogs	1	765	4809719	0.370831	Sweden	Europe
SVAL000009	Swedish Vallhund	Breed_Dogs	1	824	4797294	0.358858	Sweden	Europe
SVAL000010	Swedish Vallhund	Breed_Dogs	1	687	4809598	0.381638	Sweden	Europe
SWEH000001	Swedish Elkhound	Breed_Dogs	1	1383	4842874	0.246062	Sweden	Europe
SWEH000002	Swedish Elkhound	Breed_Dogs	1	1306	4836430	0.259205	Sweden	Europe
SWEH000003	Swedish Elkhound	Breed_Dogs	1	1496	4855128	0.245863	Sweden	Europe
SWEH000004	Swedish Elkhound	Breed_Dogs	1	1468	4848177	0.261809	Sweden	Europe
SWHN000001	Swiss Hound	Breed_Dogs	1	407	4761198	0.31233	Switzerland	Europe
SWHN000002	Swiss Hound	Breed_Dogs	1	369	4767787	0.30186	Switzerland	Europe
SWHN000003	Swiss Hound	Breed_Dogs	1	254	4792355	0.32698	Switzerland	Europe
SWHN000004	Swiss Hound	Breed_Dogs	1	329	4784876	0.281674	Switzerland	Europe
SWHN000005	Swiss Hound	Breed_Dogs	1	491	4776520	0.23651	Switzerland	Europe
SWHN000006	Swiss Hound	Breed_Dogs	1	872	4801179	0.188981	Switzerland	Europe
SWHN000007	Swiss Hound	Breed_Dogs	1	412	4772153	0.246967	Switzerland	Europe
SWHN000008	Swiss Hound	Breed_Dogs	1	382	4747508	0.248807	Switzerland	Europe
SWHN000009	Swiss Hound	Breed_Dogs	1	346	4764814	0.224079	Switzerland	Europe
SWHN000010	Swiss Hound	Breed_Dogs	1	742	4767833	0.205127	Switzerland	Europe
SWHN000011	Swiss Hound	Breed_Dogs	1	1035	4772728	0.334579	Switzerland	Europe
SWHN000012	Swiss Hound	Breed_Dogs	1	451	4788130	0.231545	Switzerland	Europe
SWWE000001	Swedish White Elkhound	Breed_Dogs	1	817	4845701	0.281047	Sweden	Europe
SWWE000002	Swedish White Elkhound	Breed_Dogs	1	835	4842545	0.291982	Sweden	Europe
SWWE000004	Swedish White Elkhound	Breed_Dogs	1	894	4863616	0.328449	Sweden	Europe
SWWE000005	Swedish White Elkhound	Breed_Dogs	1	663	4851254	0.309843	Sweden	Europe
SWWE000006	Swedish White Elkhound	Breed_Dogs	1	684	4849104	0.313038	Sweden	Europe
SWWE000007	Swedish White Elkhound	Breed_Dogs	1	378	4831766	0.356064	Sweden	Europe
SWWE000008	Swedish White Elkhound	Breed_Dogs	1	502	4836933	0.324658	Sweden	Europe
TAZI000001	Tazi	Breed_Dogs	2	6479	5116507	0.135263	Afghanistan	Asia
TAZI000003	Tazi	Breed_Dogs	2	6346	5094647	0.154239	Afghanistan	Asia
TERV000001	Cardigan Welsh Corgi	Breed_Dogs	1	816	4776374	0.327744	United Kingdom	Europe
TERV000002	Belgian Tervuren	Breed_Dogs	1	606	4673360	0.299332	Belgium	Europe
TERV000003	Belgian Tervuren	Breed_Dogs	1	772	4637572	0.264695	Belgium	Europe
TERV000004	Belgian Tervuren	Breed_Dogs	1	575	4695683	0.310448	Belgium	Europe
TERV000005	Belgian Tervuren	Breed_Dogs	1	656	4600008	0.224252	Belgium	Europe
TERV000006	Belgian Tervuren	Breed_Dogs	1	696	4722327	0.399791	Belgium	Europe
THAI000001	Thai Ridgeback	Breed_Dogs	3	5101	5615280	0.193002	Thailand	Asia
THAI000002	Thai Ridgeback	Breed_Dogs	3	5943	5658388	0.139665	Thailand	Asia
THAI000003	Thai Ridgeback	Breed_Dogs	3	7334	5607135	0.135136	Thailand	Asia
THAI000004	Thai Ridgeback	Breed_Dogs	3	5818	5649549	0.238424	Thailand	Asia
THAI000005	Thai Ridgeback	Breed_Dogs	3	6467	5619951	0.163934	Thailand	Asia
THAI000006	Thai Ridgeback	Breed_Dogs	3	5155	5610743	0.174666	Thailand	Asia
THAI000007	Thai Ridgeback	Breed_Dogs	3	8635	5596714	0.146332	Thailand	Asia
THAI000008	Thai Ridgeback	Breed_Dogs	3	6439	5616403	0.108561	Thailand	Asia
THAI000009	Thai Ridgeback	Breed_Dogs	3	5201	5655303	0.159427	Thailand	Asia
TIBS000001	Tibetan Spaniel	Breed_Dogs	2	1745	5155590	0.271995	China	Asia
TIBS000005	Tibetan Spaniel	Breed_Dogs	2	1957	5138394	0.294571	China	Asia
TIBS000006	Tibetan Spaniel	Breed_Dogs	2	1345	5156073	0.264127	China	Asia
TIBS000007	Tibetan Spaniel	Breed_Dogs	2	1485	5166013	0.254934	China	Asia
TIBT000001	Tibetan Terrier	Breed_Dogs	2	2793	5002670	0.281248	China	Asia
TIBT000002	Tibetan Terrier	Breed_Dogs	1	2310	4937300	0.236925	China	Asia
TIBT000003	Tibetan Terrier	Breed_Dogs	1	2065	4939894	0.366883	China	Asia
TMSK000001	Tamaskan	Breed_Dogs	2	5161	4525142	0.154712	United Kingdom	Europe
TOSA000001	Tosa Inu	Breed_Dogs	2	2700	4966307	0.238527	Japan	Asia
TOSA000002	Tosa Inu	Breed_Dogs	2	2551	4965659	0.259678	Japan	Asia
TOSA000003	Tosa Inu	Breed_Dogs	1	2373	4940753	0.292105	Japan	Asia
TPOO000001	Toy Poodle	Breed_Dogs	1	1166	4755280	0.235271	Germany	Europe
TPOO000002	Toy Poodle	Breed_Dogs	1	1242	4775274	0.207303	Germany	Europe
TURM000001	Turkish Mastiff	Breed_Dogs	2	5231	5054564	0.117065	Turkey	Asia
TURM000002	Turkish Mastiff	Breed_Dogs	2	4768	5053538	0.147528	Turkey	Asia
TURM000003	Turkish Mastiff	Breed_Dogs	2	4511	5059193	0.15179	Turkey	Asia
TURM000004	Turkish Mastiff	Breed_Dogs	2	5415	5074374	0.110706	Turkey	Asia
TURM000005	Turkish Mastiff	Breed_Dogs	2	5354	5004253	0.109256	Turkey	Asia
TWCH000002	Treeing Walker Coonhound	Breed_Dogs	1	1852	4788547	0.205573	United States	Americas
TYFX000001	Toy Fox Terrier	Breed_Dogs	1	1002	4755787	0.181265	United States	Americas
TYFX000002	Toy Fox Terrier	Breed_Dogs	1	243	4765544	0.257102	United States	Americas
TYFX000003	Toy Fox Terrier	Breed_Dogs	1	1032	4798742	0.178401	United States	Americas
TYFX000004	Toy Fox Terrier	Breed_Dogs	1	403	4774225	0.250563	United States	Americas
TYFX000005	Toy Fox Terrier	Breed_Dogs	1	531	4770241	0.246003	United States	Americas
TYFX000006	Toy Fox Terrier	Breed_Dogs	1	504	4754719	0.290091	United States	Americas
TYFX000007	Toy Fox Terrier	Breed_Dogs	1	631	4741066	0.236892	United States	Americas
TYFX000008	Toy Fox Terrier	Breed_Dogs	1	630	4742747	0.194496	United States	Americas
TYFX000009	Toy Fox Terrier	Breed_Dogs	1	419	4749907	0.305593	United States	Americas
TYFX000010	Toy Fox Terrier	Breed_Dogs	1	480	4745580	0.218409	United States	Americas
VILLAF000001	Afghanistan	Village_Dogs	2	8231	4978351	0.104955	Afghanistan	Asia
VILLAF000002	Afghanistan	Village_Dogs	2	10012	5156782	0.0919256	Afghanistan	Asia
VILLAF000003	Afghanistan	Village_Dogs	2	8373	5050598	0.104158	Afghanistan	Asia
VILLAK000001	Alaska	Village_Dogs	2	10643	5173747	0.139258	United States	Americas
VILLAK000002	Alaska	Village_Dogs	2	9726	5264551	0.155481	United States	Americas
VILLAK000003	Alaska	Village_Dogs	2	9502	5233440	0.171405	United States	Americas
VILLAZ000001	Azerbaijan	Village_Dogs	2	8218	5022243	0.113595	Azerbaijan	Asia
VILLAZ000002	Azerbaijan	Village_Dogs	2	7991	5087930	0.10445	Azerbaijan	Asia
VILLAZ000003	Azerbaijan	Village_Dogs	2	7664	5027393	0.101521	Azerbaijan	Asia
VILLAZ000004	Azerbaijan	Village_Dogs	2	6195	5059353	0.106058	Azerbaijan	Asia
VILLAZ000005	Azerbaijan	Village_Dogs	2	6494	5027725	0.156047	Azerbaijan	Asia
VILLAZ000006	Azerbaijan	Village_Dogs	2	6134	4989547	0.106965	Azerbaijan	Asia
VILLAZ000007	Azerbaijan	Village_Dogs	2	6724	4965017	0.107719	Azerbaijan	Asia
VILLBG000001	Bulgaria	Village_Dogs	1	3119	4540769	0.302515	Bulgaria	Europe
VILLBG000002	Bulgaria	Village_Dogs	1	3210	4752036	0.122132	Bulgaria	Europe
VILLBZ000001	Belize	Village_Dogs	1	4079	4707656	0.133885	Belize	Americas
VILLBZ000002	Belize	Village_Dogs	1	2173	4654314	0.139502	Belize	Americas
VILLBZ000003	Belize	Village_Dogs	1	3327	4652094	0.164697	Belize	Americas
VILLCG000001	Congo	Village_Dogs	1	5999	4772219	0.132779	Congo	Africa
VILLCG000002	Congo	Village_Dogs	1	5657	4754077	0.126687	Congo	Africa
VILLCG000003	Congo	Village_Dogs	1	5919	4762432	0.134075	Congo	Africa
VILLCG000004	Congo	Village_Dogs	1	3856	4595583	0.142344	Congo	Africa
VILLCG000005	Congo	Village_Dogs	1	4031	4733880	0.141225	Congo	Africa
VILLCG000006	Congo	Village_Dogs	1	3629	4579141	0.138278	Congo	Africa
VILLCG000007	Congo	Village_Dogs	2	12553	5171533	0.195373	Congo	Africa
VILLCG000008	Congo	Village_Dogs	2	10764	5120123	0.256287	Congo	Africa
VILLCG000009	Congo	Village_Dogs	2	9788	5052422	0.203285	Congo	Africa
VILLCG000010	Congo	Village_Dogs	1	1717	4729827	0.219915	Congo	Africa
VILLCG000011	Congo	Village_Dogs	1	2447	4771782	0.189617	Congo	Africa
VILLCG000012	Congo	Village_Dogs	1	2021	4750727	0.155571	Congo	Africa
VILLCG000013	Congo	Village_Dogs	1	2681	4751334	0.141224	Congo	Africa
VILLCG000014	Congo	Village_Dogs	1	2416	4719125	0.141037	Congo	Africa
VILLCG000015	Congo	Village_Dogs	1	4874	4778388	0.133435	Congo	Africa
VILLCG000016	Congo	Village_Dogs	1	2298	4687872	0.149928	Congo	Africa
VILLCN000001	China	Village_Dogs	3	17111	5763018	0.0905972	China	Asia
VILLCN000002	China	Village_Dogs	3	15789	5641739	0.0828882	China	Asia
VILLCN000003	China	Village_Dogs	3	17136	5756766	0.0828208	China	Asia
VILLCN000004	China	Village_Dogs	2	11171	5393740	0.0765966	China	Asia
VILLCN000005	China	Village_Dogs	3	10495	5536505	0.136354	China	Asia
VILLCN000006	China	Village_Dogs	3	12720	5595462	0.121675	China	Asia
VILLCN000007	China	Village_Dogs	2	9497	5285572	0.215468	China	Asia
VILLCN000008	China	Village_Dogs	2	8847	5062355	0.0859805	China	Asia
VILLCN000009	China	Village_Dogs	2	11210	5049543	0.0762042	China	Asia
VILLCN000011	China	Village_Dogs	2	12097	5441379	0.0561473	China	Asia
VILLCN000012	China	Village_Dogs	2	9580	5445050	0.0719093	China	Asia
VILLCN000013	China	Village_Dogs	3	12863	5551875	0.0816686	China	Asia
VILLCN000014	China	Village_Dogs	3	10670	5512446	0.108913	China	Asia
VILLCN000016	China	Village_Dogs	2	9325	5389079	0.187815	China	Asia
VILLCN000018	China	Village_Dogs	2	10141	4928648	0.0547914	China	Asia
VILLCN000019	China	Village_Dogs	3	12443	5295224	0.0717046	China	Asia
VILLCN000020	China	Village_Dogs	2	9678	5369053	0.0809279	China	Asia
VILLCN000021	China	Village_Dogs	3	15491	5775339	0.0919279	China	Asia
VILLCN000023	China	Village_Dogs	3	15949	5802862	0.0822509	China	Asia
VILLCN000025	China	Village_Dogs	3	10992	5459877	0.062138	China	Asia
VILLCN000026	China	Village_Dogs	3	13471	5617972	0.0783956	China	Asia
VILLCN000027	China	Village_Dogs	3	13969	5736367	0.0989584	China	Asia
VILLCN000028	China	Village_Dogs	3	16574	5797702	0.0945509	China	Asia
VILLCN000030	China	Village_Dogs	3	15020	5700971	0.0502405	China	Asia
VILLCN000031	China	Village_Dogs	2	9185	5326509	0.0508136	China	Asia
VILLCN000032	China	Village_Dogs	3	15790	5765634	0.0782795	China	Asia
VILLCN000034	China	Village_Dogs	3	16026	5732736	0.0976146	China	Asia
VILLCN000035	China	Village_Dogs	3	15827	5786811	0.0979915	China	Asia
VILLCN000036	China	Village_Dogs	3	13316	5454249	0.0822359	China	Asia
VILLCN000037	China	Village_Dogs	3	16590	5803780	0.104002	China	Asia
VILLCN000038	China	Village_Dogs	3	13502	5444857	0.0838451	China	Asia
VILLCN000039	China	Village_Dogs	3	14858	5715399	0.0923512	China	Asia
VILLCN000040	China	Village_Dogs	3	10768	5248145	0.127111	China	Asia
VILLCN000042	China	Village_Dogs	3	11688	5263692	0.11459	China	Asia
VILLCN000044	China	Village_Dogs	3	14105	5720549	0.0760349	China	Asia
VILLCN000046	China	Village_Dogs	3	13580	5666704	0.0874181	China	Asia
VILLCN000047	China	Village_Dogs	2	9838	5362427	0.0823984	China	Asia
VILLCN000048	China	Village_Dogs	3	10783	5429927	0.069833	China	Asia
VILLCN000049	China	Village_Dogs	3	10822	5467693	0.0754612	China	Asia
VILLCN000050	China	Village_Dogs	3	13903	5596837	0.0703636	China	Asia
VILLCN000051	China	Village_Dogs	3	15116	5780612	0.0921535	China	Asia
VILLCN000052	China	Village_Dogs	2	9629	5324094	0.0611203	China	Asia
VILLCN000053	China	Village_Dogs	3	14045	5717035	0.0751009	China	Asia
VILLCN000054	China	Village_Dogs	3	14084	5699678	0.0763687	China	Asia
VILLCN000055	China	Village_Dogs	3	16040	5774561	0.114476	China	Asia
VILLCN000056	China	Village_Dogs	3	6734	5733057	0.104581	China	Asia
VILLCN000057	China	Village_Dogs	3	15074	5706993	0.0851544	China	Asia
VILLCN000058	China	Village_Dogs	3	7112	5765037	0.0924802	China	Asia
VILLCN000059	China	Village_Dogs	3	14587	5713398	0.0958322	China	Asia
VILLCN000060	China	Village_Dogs	3	14224	5777010	0.149054	China	Asia
VILLCN000062	China	Village_Dogs	3	15873	5678029	0.0816994	China	Asia
VILLCN000063	China	Village_Dogs	2	8760	4967882	0.0754159	China	Asia
VILLCN000064	China	Village_Dogs	2	9328	4890684	0.0844181	China	Asia
VILLCN000065	China	Village_Dogs	2	8598	4896521	0.0988087	China	Asia
VILLCN000066	China	Village_Dogs	2	11514	5316781	0.0796666	China	Asia
VILLCN000068	China	Village_Dogs	3	15559	5577339	0.0822854	China	Asia
VILLCN000069	China	Village_Dogs	3	16663	5732683	0.0806035	China	Asia
VILLCN000070	China	Village_Dogs	3	16836	5714893	0.0815482	China	Asia
VILLCN000071	China	Village_Dogs	3	16080	5622759	0.0830056	China	Asia
VILLCN000072	China	Village_Dogs	3	16581	5732991	0.0774321	China	Asia
VILLCN000073	China	Village_Dogs	3	16092	5684433	0.0901899	China	Asia
VILLCN000074	China	Village_Dogs	3	14218	5553646	0.0744308	China	Asia
VILLCN000075	China	Village_Dogs	2	11429	5275086	0.0945206	China	Asia
VILLCN000077	China	Village_Dogs	2	4056	4127372	0.182765	China	Asia
VILLCN000078	China	Village_Dogs	3	12112	5401928	0.10549	China	Asia
VILLCN000079	China	Village_Dogs	2	10839	5186079	0.0780946	China	Asia
VILLCN000080	China	Village_Dogs	2	10406	5084396	0.0813298	China	Asia
VILLCN000081	China	Village_Dogs	2	7343	5144666	0.0881738	China	Asia
VILLCN000084	China	Village_Dogs	3	14948	5619704	0.0882684	China	Asia
VILLCN000086	China	Village_Dogs	3	13049	5716903	0.0759688	China	Asia
VILLCN000087	China	Village_Dogs	3	11717	5519224	0.213555	China	Asia
VILLCN000088	China	Village_Dogs	2	11548	5379894	0.0757757	China	Asia
VILLCN000089	China	Village_Dogs	3	13770	5635686	0.0592686	China	Asia
VILLCN000090	China	Village_Dogs	3	13154	5583064	0.120788	China	Asia
VILLCN000091	China	Village_Dogs	3	12677	5680616	0.200897	China	Asia
VILLCN000092	China	Village_Dogs	3	13724	5538677	0.0828133	China	Asia
VILLCN000093	China	Village_Dogs	3	14926	5596626	0.0801389	China	Asia
VILLCN000094	China	Village_Dogs	2	8959	5289787	0.0816993	China	Asia
VILLCN000097	China	Village_Dogs	3	11847	5551196	0.177447	China	Asia
VILLCN000099	China	Village_Dogs	3	15688	5683091	0.0892505	China	Asia
VILLCN000100	China	Village_Dogs	2	6886	5226631	0.0924145	China	Asia
VILLCN000103	China	Village_Dogs	3	15678	5712516	0.0720309	China	Asia
VILLCN000104	China	Village_Dogs	3	15456	5667972	0.0737529	China	Asia
VILLCN000108	China	Village_Dogs	2	11005	5393506	0.0693782	China	Asia
VILLCN000109	China	Village_Dogs	2	10320	5364486	0.0656545	China	Asia
VILLCN000111	China	Village_Dogs	3	11804	5180020	0.0489231	China	Asia
VILLCN000112	China	Village_Dogs	2	9896	5268573	0.222479	China	Asia
VILLCN000113	China	Village_Dogs	2	4125	4091956	0.156828	China	Asia
VILLCN000114	China	Village_Dogs	2	9331	4989618	0.0998811	China	Asia
VILLCN000115	China	Village_Dogs	2	6066	4458438	0.147859	China	Asia
VILLCN000116	China	Village_Dogs	2	6330	4563824	0.135529	China	Asia
VILLCN000117	China	Village_Dogs	2	6252	4515915	0.128004	China	Asia
VILLCN000118	China	Village_Dogs	2	11491	5247470	0.081777	China	Asia
VILLCN000119	China	Village_Dogs	2	3444	4597063	0.108334	China	Asia
VILLCN000120	China	Village_Dogs	2	7873	4782576	0.0942742	China	Asia
VILLCN000121	China	Village_Dogs	3	13178	5649418	0.0816542	China	Asia
VILLCN000123	China	Village_Dogs	2	10157	5260987	0.104369	China	Asia
VILLCN000124	China	Village_Dogs	2	9518	5434788	0.0652236	China	Asia
VILLCN000125	China	Village_Dogs	3	12037	5667438	0.09182	China	Asia
VILLCN000126	China	Village_Dogs	3	4806	5678543	0.0829254	China	Asia
VILLCN000128	China	Village_Dogs	3	11595	5658869	0.090376	China	Asia
VILLCN000129	China	Village_Dogs	3	7050	5668715	0.0873041	China	Asia
VILLCN000130	China	Village_Dogs	3	4289	5667405	0.086977	China	Asia
VILLCN000131	China	Village_Dogs	3	12411	5528365	0.0868519	China	Asia
VILLCN000132	China	Village_Dogs	3	10526	5638898	0.129526	China	Asia
VILLCN000133	China	Village_Dogs	3	12039	5659491	0.09038	China	Asia
VILLCN000134	China	Village_Dogs	3	7305	5661122	0.0934055	China	Asia
VILLCN000135	China	Village_Dogs	3	4423	5647430	0.0886043	China	Asia
VILLCN000136	China	Village_Dogs	3	11682	5672338	0.0896123	China	Asia
VILLCN000137	China	Village_Dogs	3	4095	5644459	0.0869451	China	Asia
VILLCN000138	China	Village_Dogs	2	4031	4742106	0.103375	China	Asia
VILLCN000139	China	Village_Dogs	3	12553	5510084	0.226364	China	Asia
VILLCN000140	China	Village_Dogs	3	13113	5531557	0.143841	China	Asia
VILLCN000142	China	Village_Dogs	2	9842	4954140	0.0647178	China	Asia
VILLCN000143	China	Village_Dogs	3	12416	5422301	0.0670562	China	Asia
VILLCN000144	China	Village_Dogs	3	13036	5393206	0.086287	China	Asia
VILLCN000145	China	Village_Dogs	3	12142	5330934	0.0808778	China	Asia
VILLCN000146	China	Village_Dogs	2	10502	5452025	0.192731	China	Asia
VILLCN000147	China	Village_Dogs	3	15776	5730003	0.0918437	China	Asia
VILLCN000148	China	Village_Dogs	3	13422	5353393	0.0818973	China	Asia
VILLCN000152	China	Village_Dogs	2	1811	5140396	0.0785564	China	Asia
VILLCN000153	China	Village_Dogs	2	1907	5156745	0.0818529	China	Asia
VILLCN000154	China	Village_Dogs	2	1883	5161316	0.0992304	China	Asia
VILLCR000001	Costa Rica	Village_Dogs	1	1870	4751949	0.350344	Costa Rica	Americas
VILLCR000002	Costa Rica	Village_Dogs	1	1718	4778404	0.152246	Costa Rica	Americas
VILLCR000003	Costa Rica	Village_Dogs	1	2175	4775764	0.134676	Costa Rica	Americas
VILLCU000001	Cuba	Village_Dogs	1	2223	4608199	0.162917	Cuba	Americas
VILLFJ000001	Fiji	Village_Dogs	1	2519	4740220	0.150371	Fiji	Oceania
VILLFJ000002	Fiji	Village_Dogs	1	2211	4694445	0.147658	Fiji	Oceania
VILLFJ000003	Fiji	Village_Dogs	1	2002	4632124	0.158318	Fiji	Oceania
VILLFJ000004	Fiji	Village_Dogs	1	1923	4629590	0.145205	Fiji	Oceania
VILLFJ000005	Fiji	Village_Dogs	1	2178	4715107	0.144939	Fiji	Oceania
VILLFJ000006	Fiji	Village_Dogs	1	2392	4739001	0.140906	Fiji	Oceania
VILLFJ000007	Fiji	Village_Dogs	1	1958	4829409	0.306222	Fiji	Oceania
VILLFJ000008	Fiji	Village_Dogs	1	2351	4813336	0.167121	Fiji	Oceania
VILLFJ000009	Fiji	Village_Dogs	1	2638	4791535	0.145367	Fiji	Oceania
VILLIR000001	Iran	Village_Dogs	2	7096	4869416	0.103966	Iran	Asia
VILLIR000002	Iran	Village_Dogs	2	8922	5035598	0.118285	Iran	Asia
VILLIR000003	Iran	Village_Dogs	2	5221	4375302	0.146287	Iran	Asia
VILLIR000004	Iran	Village_Dogs	2	3283	5102789	0.104021	Iran	Asia
VILLIR000005	Iran	Village_Dogs	2	3317	5069864	0.101257	Iran	Asia
VILLIR000006	Iran	Village_Dogs	2	6081	4968964	0.104186	Iran	Asia
VILLIR000007	Iran	Village_Dogs	2	10231	5088023	0.102371	Iran	Asia
VILLIR000008	Iran	Village_Dogs	2	7659	4984084	0.100787	Iran	Asia
VILLIR000009	Iran	Village_Dogs	2	5904	4601242	0.105743	Iran	Asia
VILLIR000011	Iran	Village_Dogs	2	5881	4886241	0.114173	Iran	Asia
VILLIR000012	Iran	Village_Dogs	2	6523	4999981	0.151806	Iran	Asia
VILLIR000013	Iran	Village_Dogs	2	6522	4948911	0.0892144	Iran	Asia
VILLIR000014	Iran	Village_Dogs	2	7254	4995093	0.0910951	Iran	Asia
VILLIR000015	Iran	Village_Dogs	2	7254	4908679	0.107933	Iran	Asia
VILLIR000016	Iran	Village_Dogs	2	5646	5078205	0.336367	Iran	Asia
VILLIR000017	Iran	Village_Dogs	2	7376	5054192	0.106352	Iran	Asia
VILLIR000018	Iran	Village_Dogs	2	9293	5141087	0.123762	Iran	Asia
VILLIR000019	Iran	Village_Dogs	2	9545	5120609	0.098222	Iran	Asia
VILLIR000020	Iran	Village_Dogs	2	8220	5053860	0.130503	Iran	Asia
VILLIR000021	Iran	Village_Dogs	2	6900	5007666	0.193621	Iran	Asia
VILLIR000022	Iran	Village_Dogs	2	7692	4889815	0.103839	Iran	Asia
VILLIR000023	Iran	Village_Dogs	1	4143	4255361	0.169494	Iran	Asia
VILLIR000025	Iran	Village_Dogs	2	7918	4889315	0.0789155	Iran	Asia
VILLIR000026	Iran	Village_Dogs	2	8147	4938851	0.0947058	Iran	Asia
VILLIR000028	Iran	Village_Dogs	2	5907	5070314	0.169702	Iran	Asia
VILLIR000029	Iran	Village_Dogs	2	7409	4978305	0.0998474	Iran	Asia
VILLIR000030	Iran	Village_Dogs	2	8938	5037652	0.103413	Iran	Asia
VILLKE000001	Kenya	Village_Dogs	2	3911	4896377	0.151988	Kenya	Africa
VILLKE000002	Kenya	Village_Dogs	2	5649	4916378	0.145002	Kenya	Africa
VILLKE000003	Kenya	Village_Dogs	2	4093	4871209	0.154972	Kenya	Africa
VILLKE000004	Kenya	Village_Dogs	2	7717	4833887	0.128082	Kenya	Africa
VILLKE000005	Kenya	Village_Dogs	2	3859	4770929	0.143156	Kenya	Africa
VILLKE000006	Kenya	Village_Dogs	2	4772	4905363	0.124043	Kenya	Africa
VILLKE000007	Kenya	Village_Dogs	2	5275	4875232	0.155007	Kenya	Africa
VILLKE000008	Kenya	Village_Dogs	2	8634	5048663	0.126064	Kenya	Africa
VILLKE000009	Kenya	Village_Dogs	2	2792	4827250	0.245143	Kenya	Africa
VILLKE000010	Kenya	Village_Dogs	2	6456	4994998	0.116086	Kenya	Africa
VILLKE000011	Kenya	Village_Dogs	2	6707	4957377	0.129759	Kenya	Africa
VILLKE000012	Kenya	Village_Dogs	2	3811	4864906	0.146355	Kenya	Africa
VILLKE000013	Kenya	Village_Dogs	2	4607	4884315	0.158402	Kenya	Africa
VILLKE000014	Kenya	Village_Dogs	2	2944	4857109	0.159173	Kenya	Africa
VILLKE000015	Kenya	Village_Dogs	2	4025	4824183	0.15107	Kenya	Africa
VILLKE000016	Kenya	Village_Dogs	2	4475	4902327	0.150197	Kenya	Africa
VILLKE000017	Kenya	Village_Dogs	2	6137	4861934	0.125361	Kenya	Africa
VILLKE000019	Kenya	Village_Dogs	2	5634	5005792	0.134291	Kenya	Africa
VILLKH000001	Cambodia	Village_Dogs	2	5069	5231519	0.385593	Cambodia	Asia
VILLKH000002	Cambodia	Village_Dogs	2	6154	5147741	0.119308	Cambodia	Asia
VILLKH000003	Cambodia	Village_Dogs	3	14588	5561190	0.104524	Cambodia	Asia
VILLKH000004	Cambodia	Village_Dogs	2	12875	5400627	0.0967614	Cambodia	Asia
VILLLK000001	Sri Lanka	Village_Dogs	2	10358	4525096	0.0859627	Sri Lanka	Asia
VILLLR000001	Liberia	Village_Dogs	2	15170	5179582	0.150781	Liberia	Africa
VILLLR000002	Liberia	Village_Dogs	2	9857	5030429	0.139061	Liberia	Africa
VILLLR000003	Liberia	Village_Dogs	2	9163	4972696	0.116084	Liberia	Africa
VILLLR000004	Liberia	Village_Dogs	2	11500	5042796	0.131646	Liberia	Africa
VILLLR000005	Liberia	Village_Dogs	2	9428	4964145	0.127467	Liberia	Africa
VILLLR000006	Liberia	Village_Dogs	2	10774	5100603	0.173396	Liberia	Africa
VILLLR000007	Liberia	Village_Dogs	2	10262	4980092	0.140871	Liberia	Africa
VILLLR000008	Liberia	Village_Dogs	2	11810	5106085	0.131528	Liberia	Africa
VILLLR000009	Liberia	Village_Dogs	2	10335	5029741	0.119584	Liberia	Africa
VILLLR000010	Liberia	Village_Dogs	2	10709	5014108	0.144697	Liberia	Africa
VILLLR000011	Liberia	Village_Dogs	2	11190	4978324	0.123341	Liberia	Africa
VILLLR000012	Liberia	Village_Dogs	2	9580	4982447	0.125905	Liberia	Africa
VILLLR000013	Liberia	Village_Dogs	2	7465	5085383	0.178962	Liberia	Africa
VILLLR000014	Liberia	Village_Dogs	2	8132	5093819	0.117994	Liberia	Africa
VILLLR000015	Liberia	Village_Dogs	2	10205	5060094	0.133529	Liberia	Africa
VILLLR000016	Liberia	Village_Dogs	2	6857	4838557	0.125318	Liberia	Africa
VILLLR000017	Liberia	Village_Dogs	2	6486	4895138	0.143294	Liberia	Africa
VILLMM000004	Myanmar	Village_Dogs	2	14520	5426508	0.0617766	Myanmar	Asia
VILLMM000005	Myanmar	Village_Dogs	3	17279	5681704	0.0669296	Myanmar	Asia
VILLMX000002	Mexico	Village_Dogs	1	1492	4749952	0.281443	Mexico	Americas
VILLMX000003	Mexico	Village_Dogs	1	4803	4760627	0.125289	Mexico	Americas
VILLMX000004	Mexico	Village_Dogs	1	3769	4713149	0.12968	Mexico	Americas
VILLNP000001	Nepal	Village_Dogs	3	15407	5455599	0.087061	Nepal	Asia
VILLNP000002	Nepal	Village_Dogs	3	6288	5494131	0.118205	Nepal	Asia
VILLNP000003	Nepal	Village_Dogs	2	5590	4368217	0.0851498	Nepal	Asia
VILLNP000004	Nepal	Village_Dogs	3	7053	5490666	0.114123	Nepal	Asia
VILLNP000005	Nepal	Village_Dogs	3	9961	5421486	0.341701	Nepal	Asia
VILLNP000006	Nepal	Village_Dogs	3	15620	5508989	0.261083	Nepal	Asia
VILLNP000007	Nepal	Village_Dogs	1	852	3380863	0.39161	Nepal	Asia
VILLNP000008	Nepal	Village_Dogs	3	10820	5398243	0.0979065	Nepal	Asia
VILLPE000002	South America	Village_Dogs	1	3819	4652647	0.136084	Peru	Americas
VILLPE000003	South America	Village_Dogs	1	3891	4699743	0.152439	Peru	Americas
VILLPE000008	South America	Village_Dogs	1	4513	4650583	0.125341	Peru	Americas
VILLPF000001	French Polynesia	Village_Dogs	1	1980	4737003	0.145472	French Polynesia	Oceania
VILLPF000002	French Polynesia	Village_Dogs	1	915	4683383	0.15174	French Polynesia	Oceania
VILLPF000003	French Polynesia	Village_Dogs	1	1392	4422134	0.326548	French Polynesia	Oceania
VILLPF000004	French Polynesia	Village_Dogs	1	1343	4811034	0.158604	French Polynesia	Oceania
VILLPF000005	French Polynesia	Village_Dogs	1	715	4701142	0.191566	French Polynesia	Oceania
VILLPF000006	French Polynesia	Village_Dogs	1	2136	4791759	0.169281	French Polynesia	Oceania
VILLPF000007	French Polynesia	Village_Dogs	1	1554	4149366	0.15204	French Polynesia	Oceania
VILLPF000008	French Polynesia	Village_Dogs	1	791	4745613	0.380416	French Polynesia	Oceania
VILLPF000009	French Polynesia	Village_Dogs	1	2002	4520166	0.143315	French Polynesia	Oceania
VILLPF000010	French Polynesia	Village_Dogs	1	1589	4582868	0.142846	French Polynesia	Oceania
VILLPF000011	French Polynesia	Village_Dogs	1	1414	4655760	0.153437	French Polynesia	Oceania
VILLPF000012	French Polynesia	Village_Dogs	1	2036	4591205	0.135431	French Polynesia	Oceania
VILLPF000013	French Polynesia	Village_Dogs	1	1875	4695522	0.161627	French Polynesia	Oceania
VILLPH000001	Philippines	Village_Dogs	2	10234	5170028	0.120965	Philippines	Asia
VILLTC000001	Turks and Caicos Islands	Village_Dogs	1	2300	4650266	0.188702	Turks and Caicos Islands	Americas
VILLTH000002	Thailand	Village_Dogs	3	17768	5727721	0.102658	Thailand	Asia
VILLTH000005	Thailand	Village_Dogs	3	13822	5341603	0.0862842	Thailand	Asia
VILLTH000006	Thailand	Village_Dogs	2	10949	5041119	0.100133	Thailand	Asia
VILLTH000008	Thailand	Village_Dogs	2	11463	5058594	0.111483	Thailand	Asia
VILLTH000009	Thailand	Village_Dogs	2	10358	4873337	0.130711	Thailand	Asia
VILLTJ000001	Tajikistan	Village_Dogs	2	8180	4907377	0.104798	Tajikistan	Asia
VILLUZ000001	Uzbekistan	Village_Dogs	2	9668	5098068	0.0933347	Uzbekistan	Asia
VILLUZ000002	Uzbekistan	Village_Dogs	2	5301	5001831	0.107758	Uzbekistan	Asia
VILLUZ000003	Uzbekistan	Village_Dogs	2	5992	5070137	0.108462	Uzbekistan	Asia
VILLUZ000004	Uzbekistan	Village_Dogs	2	5662	5077182	0.105808	Uzbekistan	Asia
VILLUZ000005	Uzbekistan	Village_Dogs	2	6461	5049348	0.10489	Uzbekistan	Asia
VILLUZ000006	Uzbekistan	Village_Dogs	2	4684	5034339	0.349053	Uzbekistan	Asia
VIZS000001	Vizsla	Breed_Dogs	1	733	4763954	0.25117	Hungary	Europe
VIZS000002	Vizsla	Breed_Dogs	1	1657	4781343	0.31662	Hungary	Europe
VIZS000003	Vizsla	Breed_Dogs	1	639	4768254	0.266609	Hungary	Europe
VIZS000004	Vizsla	Breed_Dogs	1	585	4753471	0.471048	Hungary	Europe
VIZS000005	Vizsla	Breed_Dogs	1	718	4758081	0.289562	Hungary	Europe
VIZS000006	Vizsla	Breed_Dogs	1	576	4758491	0.26419	Hungary	Europe
VIZS000007	Vizsla	Breed_Dogs	1	688	4738711	0.287212	Hungary	Europe
VPIN000001	Volpino Italiano	Breed_Dogs	1	344	4789059	0.405306	Italy	Europe
VPIN000002	Volpino Italiano	Breed_Dogs	1	342	4783197	0.341945	Italy	Europe
VPIN000003	Volpino Italiano	Breed_Dogs	1	233	4773421	0.350148	Italy	Europe
VPIN000004	Volpino Italiano	Breed_Dogs	1	400	4787638	0.321115	Italy	Europe
VPIN000005	Volpino Italiano	Breed_Dogs	1	355	4786641	0.353771	Italy	Europe
VPIN000006	Volpino Italiano	Breed_Dogs	1	442	4797116	0.316085	Italy	Europe
WEIM000001	Weimaraner	Breed_Dogs	1	477	4794552	0.451666	Germany	Europe
WEIM000002	Weimaraner	Breed_Dogs	1	584	4798724	0.391246	Germany	Europe
WEIM000003	Weimaraner	Breed_Dogs	1	1641	4743500	0.133355	Germany	Europe
WEIM000004	Weimaraner	Breed_Dogs	1	514	4781396	0.403863	Germany	Europe
WEIM000005	Weimaraner	Breed_Dogs	1	848	4754508	0.32591	Germany	Europe
WELT000001	Welsh Terrier	Breed_Dogs	1	390	4722322	0.324302	United Kingdom	Europe
WELT000002	Welsh Terrier	Breed_Dogs	1	343	4728906	0.338287	United Kingdom	Europe
WELT000003	Welsh Terrier	Breed_Dogs	1	287	4769923	0.414785	United Kingdom	Europe
WELT000004	Welsh Terrier	Breed_Dogs	1	505	4736198	0.289106	United Kingdom	Europe
WELT000005	Welsh Terrier	Breed_Dogs	1	414	4764133	0.308284	United Kingdom	Europe
WHIP000001	Whippet	Breed_Dogs	1	543	4686370	0.379529	United Kingdom	Europe
WHIP000002	Whippet	Breed_Dogs	1	595	4704062	0.446898	United Kingdom	Europe
WHIP000003	Whippet	Breed_Dogs	1	652	4703325	0.387419	United Kingdom	Europe
WHIP000004	Whippet	Breed_Dogs	1	1114	4702836	0.290519	United Kingdom	Europe
WHIP000005	Whippet	Breed_Dogs	1	589	4703956	0.372515	United Kingdom	Europe
WHIP000006	Whippet	Breed_Dogs	1	877	4689929	0.287117	United Kingdom	Europe
WHPG000001	Wirehaired Pointing Griffon	Breed_Dogs	1	529	4745878	0.286356	Netherlands	Europe
WHPG000002	Wirehaired Pointing Griffon	Breed_Dogs	1	514	4772501	0.318308	Netherlands	Europe
WHPG000003	Wirehaired Pointing Griffon	Breed_Dogs	1	530	4744299	0.318483	Netherlands	Europe
WHPG000004	Wirehaired Pointing Griffon	Breed_Dogs	1	816	4738426	0.260113	Netherlands	Europe
WHPG000005	Wirehaired Pointing Griffon	Breed_Dogs	1	793	4750990	0.237902	Netherlands	Europe
WHPG000006	Wirehaired Pointing Griffon	Breed_Dogs	1	878	4734707	0.200451	Netherlands	Europe
WIFX000001	Wire Fox Terrier	Breed_Dogs	1	367	4732167	0.343947	United Kingdom	Europe
WIFX000002	Wire Fox Terrier	Breed_Dogs	1	351	4771530	0.470562	United Kingdom	Europe
WSSD000003	White Swiss Shepherd Dog	Breed_Dogs	1	150	3577072	0.412514	Switzerland	Europe
WSSD000004	White Swiss Shepherd Dog	Breed_Dogs	1	162	3562082	0.440452	Switzerland	Europe
WSSD000005	White Swiss Shepherd Dog	Breed_Dogs	1	227	3496887	0.34058	Switzerland	Europe
WSSD000006	White Swiss Shepherd Dog	Breed_Dogs	1	374	3520691	0.324996	Switzerland	Europe
WSSD000007	White Swiss Shepherd Dog	Breed_Dogs	1	207	3549913	0.403732	Switzerland	Europe
WSSD000008	White Swiss Shepherd Dog	Breed_Dogs	1	246	3484477	0.316632	Switzerland	Europe
WSSD000009	White Swiss Shepherd Dog	Breed_Dogs	1	230	3468822	0.373561	Switzerland	Europe
WSSD000010	White Swiss Shepherd Dog	Breed_Dogs	1	284	3556186	0.381221	Switzerland	Europe
WSSP000002	Welsh Springer Spaniel	Breed_Dogs	1	591	4749346	0.338242	United Kingdom	Europe
WSSP000003	Welsh Springer Spaniel	Breed_Dogs	1	493	4759195	0.357923	United Kingdom	Europe
WSSP000004	Welsh Springer Spaniel	Breed_Dogs	1	502	4735102	0.388231	United Kingdom	Europe
WSSP000005	Welsh Springer Spaniel	Breed_Dogs	1	533	4716745	0.406056	United Kingdom	Europe
XOLO000001	Xoloitzcuintli	Breed_Dogs	1	2404	4595914	0.228666	Mexico	Americas
XOLO000003	Xoloitzcuintli	Breed_Dogs	1	2835	4712480	0.16091	Mexico	Americas
XOLO000004	Xoloitzcuintli	Breed_Dogs	1	3396	4752148	0.129941	Mexico	Americas
XOLO000005	Xoloitzcuintli	Breed_Dogs	1	1709	4565679	0.129459	Mexico	Americas
XOLO000006	Xoloitzcuintli	Breed_Dogs	1	2826	4612093	0.138547	Mexico	Americas
XOLO000007	Xoloitzcuintli	Breed_Dogs	1	2867	4703140	0.133414	Mexico	Americas
YORK000001	Yorkshire Terrier	Breed_Dogs	1	642	4751457	0.391441	United Kingdom	Europe
YORK000002	Yorkshire Terrier	Breed_Dogs	1	766	4759878	0.250009	United Kingdom	Europe
YORK000003	Yorkshire Terrier	Breed_Dogs	1	949	4769281	0.255239	United Kingdom	Europe
YORK000004	Yorkshire Terrier	Breed_Dogs	1	731	4754961	0.301355	United Kingdom	Europe
YORK000005	Yorkshire Terrier	Breed_Dogs	1	806	4742521	0.265744	United Kingdom	Europe
ZAGR000001	Zagar	Breed_Dogs	1	5261	4856980	0.146976	Turkey	Asia
ZAGR000002	Zagar	Breed_Dogs	1	3539	4771808	0.131331	Turkey	Asia
ZAGR000003	Zagar	Breed_Dogs	1	5599	4839046	0.132522	Turkey	Asia
ZAGR000004	Zagar	Breed_Dogs	1	4704	4892120	0.129601	Turkey	Asia
ZAGR000005	Zagar	Breed_Dogs	1	4929	4863003	0.130039	Turkey	Asia
ZAGR000006	Zagar	Breed_Dogs	1	5005	4880894	0.15268	Turkey	Asia
ZAGR000007	Zagar	Breed_Dogs	1	4476	4836651	0.171703	Turkey	Asia
ZERD000001	Turkish Zerdava	Breed_Dogs	2	2360	4938117	0.261073	Turkey	Asia
ZERD000002	Turkish Zerdava	Breed_Dogs	2	3242	4987433	0.137487	Turkey	Asia
ZERD000003	Turkish Zerdava	Breed_Dogs	2	2516	4949103	0.221289	Turkey	Asia
ZERD000004	Turkish Zerdava	Breed_Dogs	2	3101	4963040	0.20896	Turkey	Asia
