# Supplementary material for: Large-scale genomic analysis of the domestic dog informs biological discovery
Source: HighWire-hosted journal article supplement (doi:10.1101/gr.278569.123), 2024-06-01
Supplement: Supplemental_Table_S3.xlsx [file Supplemental_Table_S3.xlsx]

## Sheet: Breed Country of Origin
Supplemental_Table_S3: Country of origin for dog breeds
Breed	Country	Region
Affenpinscher	Germany	Europe
Afghan Hound	Afghanistan	Asia
Africanis	South Africa	Africa
Aidi	Morocco	Africa
Airedale Terrier	United Kingdom	Europe
Akbash	Turkey	Asia
Alabai	Turkey	Asia
Alano Espanol	Spain	Europe
Alapaha Blue Blood Bulldog	United States	Americas
Alaskan Klee Kai	United States	Americas
Alaskan Malamute	United States	Americas
Alopekis	Greece	Europe
Alpine Dachsbracke	Austria	Europe
Altdeutsche Hutehund	Germany	Europe
American Akita	Japan	Asia
American Bulldog	United States	Americas
American Bully	United States	Americas
American English Coonhound	United States	Americas
American Eskimo Dog	United States	Americas
American Foxhound	United States	Americas
American Hairless Terrier	United States	Americas
American Leopard Hound	United States	Americas
American Pit Bull Terrier	United States	Americas
American Staffordshire Terrier	United States	Americas
American Water Spaniel	United States	Americas
American White Shepherd	United States	Americas
Anatolian Shepherd Dog	United States	Americas
Anglo-Francais de Petite Venerie	France	Europe
Appenzeller Sennenhund	Switzerland	Europe
Argentine Pila Dog	Argentina	Americas
Ariege Pointer	France	Europe
Ariegeois	France	Europe
Armant	Egypt	Africa
Armenian Gampr	Armenia	Asia
Artois Hound	France	Europe
Ashayeri	Iran	Asia
Australian Cattle Dog	Australia	Oceania
Australian Kelpie	Australia	Oceania
Australian Koolie	Australia	Oceania
Australian Shepherd	United States	Americas
Australian Stumpy Tailed Cattle Dog	Australia	Oceania
Australian Terrier	Australia	Oceania
Austrian Black and Tan Hound	Austria	Europe
Austrian Pinscher	Austria	Europe
Auvergne Pointer	France	Europe
Azawakh	Mali	Africa
Bakharwal	India	Asia
Banjara Hound	India	Asia
Barbado da Terceira	Portugal	Europe
Barbet	France	Europe
Basenji	Congo, the Democratic Republic of the	Africa
Basque Shepherd Dog	Spain	Europe
Basset Artesien Normand	France	Europe
Basset Bleu de Gascogne	France	Europe
Basset Fauve de Bretagne	France	Europe
Basset Hound	France	Europe
Bavarian Mountain Scent Hound	Germany	Europe
Bayburk Kelpi	Turkey	Asia
Beagle	United Kingdom	Europe
Beagle-Harrier	France	Europe
Bearded Collie	United Kingdom	Europe
Beauceron	France	Europe
Bedlington Terrier	United Kingdom	Europe
Belgian Laekenois	Belgium	Europe
Belgian Malinois	Belgium	Europe
Belgian Sheepdog	Belgium	Europe
Belgian Tervuren	Belgium	Europe
Bergamasco Sheepdog	Italy	Europe
Berger Blanc Suisse	Switzerland	Europe
Bernese Mountain Dog	Switzerland	Europe
Bichon Frise	Spain	Europe
Biewer Terrier	Germany	Europe
Billy	France	Europe
Black and Tan Coonhound	United States	Americas
Black Mouth Cur	United States	Americas
Black Russian Terrier	Russia	Europe
Bloodhound	France	Europe
Blue Gascony Griffon	France	Europe
Blue Picardy Spaniel	France	Europe
Bluetick Coonhound	United States	Americas
Boerboel	South Africa	Africa
Bohemian Shepherd	Czech Republic	Europe
Bolognese	Italy	Europe
Bolonka Franzuska	Russia	Europe
Border Collie	United Kingdom	Europe
Border Terrier	United Kingdom	Europe
Borzoi	Russia	Europe
Bosnian Barak	Bosnia and Herzegovina	Europe
Boston Terrier	United States	Americas
Bourbonnais Pointing Dog	France	Europe
Bouvier des Ardennes	Belgium	Europe
Bouvier des Flandres	Belgium	Europe
Boxer	Germany	Europe
Boykin Spaniel	United States	Americas
Bracco Italiano	Italy	Europe
Braque Saint-Germain	France	Europe
Braques Francais	France	Europe
Brazilian Terrier	Brazil	Americas
Briard	France	Europe
Briquet Griffon Vendeen	France	Europe
Brittany	France	Europe
Broholmer	Denmark	Europe
Bruno Jura Hound	Switzerland	Europe
Brussels Griffon	Belgium	Europe
Brussels Griffon (smooth)	Belgium	Europe
Bucovina Sheepdog	Romania	Europe
Bulgarian Barak	Bulgaria	Europe
Bulgarsko Gonche	Bulgaria	Europe
Bull Arab	Australia	Oceania
Bull Terrier	United Kingdom	Europe
Bullmastiff	United Kingdom	Europe
Bully Kutta	India	Asia
Buryat Mongolian Wolfdog	Mongolia	Asia
Ca de Bestair	Spain	Europe
Ca me Mallorqui	Spain	Europe
Ca Rater Mallorqui	Spain	Europe
Cairn Terrier	United Kingdom	Europe
Calupoh	Mexico	Americas
Campeiro Bulldog	Brazil	Americas
Can de Palliero	Spain	Europe
Canaan Dog	Israel	Asia
Canadian Eskimo Dog	Canada	Americas
Cane Corso	Italy	Europe
Cane d'Oropa	Italy	Europe
Cane de Pastore Apuano	Italy	Europe
Cane di Mannara	Italy	Europe
Cane Fonnese	Italy	Europe
Cane Paratore	Italy	Europe
Cantabrian Water Dog	Spain	Europe
Cao de Castro Laboreiro	Portugal	Europe
Cao de Gado Transmontano	Portugal	Europe
Cardigan Welsh Corgi	United Kingdom	Europe
Carea Castellano Manchego	Spain	Europe
Carea Leones	Spain	Europe
Carolina Dog	United States	Americas
Carpathian Shepherd	Romania	Europe
Catahoula Leopard Dog	United States	Americas
Catalan Sheepdog	Spain	Europe
Catalburun	Turkey	Asia
Caucasian Ovcharka	Armenia	Asia
Cavalier King Charles Spaniel	United Kingdom	Europe
Central Asian Shepherd Dog	Afghanistan	Asia
Cesky Fousek	Czech Republic	Europe
Cesky Terrier	Czech Republic	Europe
Chein Francais Blanc et Noir	France	Europe
Chein Francais Blanc et Orange	France	Europe
Chein Francais Tricolore	France	Europe
Chesapeake Bay Retriever	United States	Americas
Chihuahua	Mexico	Americas
Chilean Terrier	Chile	Americas
Chinese Crested	China	Asia
Chinese Shar-Pei	China	Asia
Chinook	United States	Americas
Chippiparai	India	Asia
Chongqing Dog	China	Asia
Chonquin Dog	China	Asia
Chortai	Ukraine	Europe
Chow Chow	China	Asia
Chuandog Hound	China	Asia
Chuandong Hound	China	Asia
Cimarron Uruguayo	Uruguay	Americas
Ciobanesc Romanesc Corb	Romania	Europe
Cirneco dell'Etna	Italy	Europe
Clumber Spaniel	United Kingdom	Europe
Cocker Spaniel	United States	Americas
Collie	United Kingdom	Europe
Colorado Mountain Dog	United States	Americas
Continental Bulldog	Switzerland	Europe
Continental Toy Spaniel (Papillon)	Belgium	Europe
Continental Toy Spaniel (Phalene)	Belgium	Europe
Corsican Dog	France	Europe
Coton de Tulear	Madagascar	Africa
Cretan Tracer	Greece	Europe
Croatian Sheepdog	Croatia	Europe
Csoban	Hungary	Europe
Curly-Coated Retriever	United Kingdom	Europe
Czechoslovakian Wolfdog	Czech Republic	Europe
Dachshund	Germany	Europe
Dalmatian	Croatia	Europe
Damchi	Bhutan	Asia
Dandie Dinmont Terrier	United Kingdom	Europe
Danish Spitz	Denmark	Europe
Danish-Swedish Farmdog	Denmark	Europe
Danish-Swedish Farmdog	Sweden	Europe
Deltari Ilir	Greece	Europe
DenMark Feist	United States	Americas
Deutsch Langhariger	Germany	Europe
Deutsch Stichelhaar	Germany	Europe
Dikkulak	Turkey	Asia
Dingo	Australia	Oceania
Doberman Pinscher	Germany	Europe
Dogo Argentino	Argentina	Americas
Dogo Braziliero	Brazil	Americas
Dogo Canario	Spain	Europe
Dogue de Bordeaux	France	Europe
Donggyeongi	South Korea	Asia
Drever	Sweden	Europe
Dunker	Norway	Europe
Dutch Partridge Dog	Netherlands	Europe
Dutch Shepherd	Netherlands	Europe
Dutch Smoushond	Netherlands	Europe
East Siberian Laika	Russia	Europe
East-European shepherd	Russia	Europe
Ecuadorian Hairless Dog	Ecuador	Americas
Elo	Germany	Europe
English Bulldog	United Kingdom	Europe
English Cocker Spaniel	United Kingdom	Europe
English Foxhound	United Kingdom	Europe
English Pointer	United Kingdom	Europe
English Setter	United Kingdom	Europe
English Shepherd	United States	Americas
English Springer Spaniel	United Kingdom	Europe
English Toy Spaniel	United Kingdom	Europe
English Toy Terrier	United Kingdom	Europe
Entlebucher Mountain Dog	Switzerland	Europe
Erbi Txakur	Spain	Europe
Estonian Hound	Estonia	Europe
Estrela Mountain Dog	Portugal	Europe
Eurasier	Germany	Europe
Field Spaniel	United Kingdom	Europe
Fila Braziliero	Brazil	Americas
Finnish Hound	Finland	Europe
Finnish Lapphund	Finland	Europe
Finnish Spitz	Finland	Europe
Flat-Coated Retriever	United Kingdom	Europe
Formosan Mountain Dog	Taiwan	Asia
French Bulldog	France	Europe
French Spaniel	France	Europe
Gaddi Kutta	India	Asia
Galgo Barbucho Patagonico	Chile	Americas
Galgo Espanol	Spain	Europe
Gammel Dansk Honsehund	Denmark	Europe
Gascon Saintongeois	France	Europe
Georgian Shepherd	Georgia	Asia
German Giant Spitz	Germany	Europe
German Hound	Germany	Europe
German Hunting Terrier	Germany	Europe
German Pinscher	Germany	Europe
German Shepherd Dog	Germany	Europe
German Shorthaired Pointer	Germany	Europe
German Spaniel	Germany	Europe
German Spitz	Germany	Europe
German Spitz Klein	Germany	Europe
German Spitz Mittel	Germany	Europe
German Wirehaired Pointer	Germany	Europe
Ghadrejani	Iran	Asia
Giant Schnauzer	Germany	Europe
Glen of Imaal Terrier	Ireland	Europe
Golden Retriever	United Kingdom	Europe
Gonczy Polski	Poland	Europe
Gordon Setter	United Kingdom	Europe
Gotland Hound	Sweden	Europe
Grand Anglo-Francais Blanc et Noir	France	Europe
Grand Basset Griffon Vendeen	France	Europe
Grand Bleu de Gascogne	France	Europe
Grand Griffon Vendeen	France	Europe
Great Anglo-French Tricolour Hound	France	Europe
Great Anglo-French White and Orange Hound	France	Europe
Great Dane	Germany	Europe
Great Pyrenees	France	Europe
Greater Swiss Mountain Dog	Switzerland	Europe
Greek Shepherd	Greece	Europe
Greenland Dog	Greenland	Americas
Greyhound	United Kingdom	Europe
Griffon	France	Europe
Griffon Fauve de Bretagne	France	Europe
Griffon Nivernais	France	Europe
Groenendael	Belgium	Europe
Guatemalan Dogo	Guatemala	Americas
Gull Dong	India	Asia
Gull Terrier	India	Asia
Gurdbasar	Armenia	Asia
Haldenstrovare	Norway	Europe
Hallefors Elkhound	Sweden	Europe
Hamiltonstovare	Sweden	Europe
Hangin Tree Cow Dog	United States	Americas
Hanoverian Scenthound	Germany	Europe
Harlequin Pinscher	Germany	Europe
Harrier	United Kingdom	Europe
Havanese	Cuba	Americas
Heideterrier	Germany	Europe
Hellenic Hound	Greece	Europe
Hierran Wolfdog	Spain	Europe
Himalayan Shepherd	Nepal	Asia
Hokkaido	Japan	Asia
Horakuv Laboratorni Pes	Czech Republic	Europe
Hortaya Borzaya	Russia	Europe
Hovawart	Germany	Europe
Huntaway	New Zealand	Oceania
Hygen Hound	Norway	Europe
Ibizan Hound	Spain	Europe
Icelandic Sheepdog	Iceland	Europe
Idaho Shag	United States	Americas
Indian Spitz	India	Asia
Irish Red and White Setter	Ireland	Europe
Irish Setter	Ireland	Europe
Irish Terrier	Ireland	Europe
Irish Water Spaniel	Ireland	Europe
Irish Wolfhound	Ireland	Europe
Istran Coarse Haired Hound	Croatia	Europe
Istrian Short Haired Hound	Croatia	Europe
Italian Greyhound	Italy	Europe
Jack Russell Terrier	United Kingdom	Europe
Japanese Akita	Japan	Asia
Japanese Chin	Japan	Asia
Japanese Spitz	Japan	Asia
Jeju	South Korea	Asia
Jindo	South Korea	Asia
Jonangi	India	Asia
Jonangi Jagilam	India	Asia
Kai Ken	Japan	Asia
Kaikadi	India	Asia
Kaliba	Hungary	Europe
Kangal	Turkey	Asia
Kanni	India	Asia
Karakachan	Bulgaria	Europe
Karelian Bear Dog	Finland	Europe
Karelo-Finnish Laika	Russia	Europe
Kars	Turkey	Asia
Karst Shepherd	Slovenia	Europe
Keeshond	Germany	Europe
Kerry Beagle	Ireland	Europe
Kerry Blue Terrier	Ireland	Europe
King Shepherd	United States	Americas
Kintamani	Indonesia	Asia
Kishu	Japan	Asia
Kokoni	Greece	Europe
Kombai	India	Asia
Komondor	Hungary	Europe
Korean Dosa	South Korea	Asia
Kromfohrlander	Germany	Europe
Kuchi	Afghanistan	Asia
Kunming Dog	China	Asia
Kuvasz	Hungary	Europe
Labrador Retriever	Canada	Americas
Lagotto Romagnolo	Italy	Europe
Laizhou Hong	China	Asia
Lakeland Terrier	United Kingdom	Europe
Lancashire Heeler	United Kingdom	Europe
Landseer	Canada	Americas
Lapponian Herder	Finland	Europe
Large Munsterlander	Germany	Europe
Leonberger	Germany	Europe
Levriero Sardo	Italy	Europe
Lhasa Apso	China	Asia
Lithuanian Hound	Lithuania	Europe
Lowchen	Germany	Europe
Lucas Terrier	United Kingdom	Europe
Lupino del Gigante	Italy	Europe
Lupo Italiano	Italy	Europe
Mackenzie River Husky	United States	Americas
Magyar Agar	Hungary	Europe
Mahratta Hound	India	Asia
Majestic Tree Hound	United States	Americas
Majorca Mastiff	Spain	Europe
Maltese	Italy	Europe
Manchester Terrier (Standard)	United Kingdom	Europe
Mantiqueira Shepherd	Portugal	Europe
Maremma Sheepdog	Italy	Europe
Markiesje	Netherlands	Europe
Mastiff	United Kingdom	Europe
Mazandarani	Iran	Asia
McNab Dog	United States	Americas
Mento	Spain	Europe
Miniature American Shepherd	United States	Americas
Miniature Australian Shepherd	United States	Americas
Miniature Bull Terrier	United Kingdom	Europe
Miniature Fox Terrier	Australia	Oceania
Miniature Pinscher	Germany	Europe
Miniature Poodle	Germany	Europe
Miniature Schnauzer	Germany	Europe
Miniature Xoloitzcuintli	Mexico	Americas
Mioritic Shepherd	Romania	Europe
Molosi Ilir	Greece	Europe
Mongolian Banhar	Mongolia	Asia
Montenegrin Mountain Hound	Montenegro	Europe
Mountain Cur	United States	Americas
Mountain Feist	United States	Americas
Mountain Treeing Feist	United States	Americas
Moyen Poodle	Germany	Europe
Mucuchi	Venezuela	Americas
Mudhol Hound	India	Asia
Mudi	Hungary	Europe
Neapolitan Mastiff	Italy	Europe
Nederlandse Kooikerhondje	Netherlands	Europe
Nenets Herding Laika	Russia	Europe
New Guinea Singing Dog	Papua New Guinea	Oceania
New Zealand Heading Dog	New Zealand	Oceania
Newfoundland	Canada	Americas
Nihon Teria	Japan	Asia
Norfolk Terrier	United Kingdom	Europe
Norrbottenspitz	Sweden	Europe
Northern Inuit Dog	United Kingdom	Europe
Norwegian Black Elkhound	Norway	Europe
Norwegian Buhund	Norway	Europe
Norwegian Elkhound	Norway	Europe
Norwegian Lundehund	Norway	Europe
Norwich Terrier	United Kingdom	Europe
Nova Scotia Duck Tolling Retriever	Canada	Americas
Nureongi	South Korea	Asia
Ogar Polski	Poland	Europe
Old English Sheepdog	United Kingdom	Europe
Old German Shepherd	Germany	Europe
Olde English Bulldogge	United States	Americas
Otterhound	United Kingdom	Europe
Ovelheiro Gaucho	Brazil	Americas
Pachon Navarro	Spain	Europe
Paerro Pastor Altoaragones	Spain	Europe
Parson Russell Terrier	United Kingdom	Europe
Pashmi	India	Asia
Pastor Garafiano	Spain	Europe
Pastore della Lessinia e del Lagorai	Italy	Europe
Pastore della Sila	Italy	Europe
Pastore della Valchiusella	Italy	Europe
Pastore Italiano	Italy	Europe
Patagonian Sheepdog	Chile	Americas
Patterdale Terrier	United Kingdom	Europe
Pekingese	China	Asia
Pembroke Welsh Corgi	United Kingdom	Europe
Perdiguero de Burgos	Spain	Europe
Perro Majorero	Spain	Europe
Peruvian Hairless	Peru	Americas
Petit Basset Griffon Vendeen	France	Europe
Petit Bleu de Gascogne	France	Europe
Pharaoh Hound	Malta	Europe
Phuquoc Ridgeback	Vietnam	Asia
Picardy Shepherd	France	Europe
Picardy Spaniel	France	Europe
Plott Hound	United States	Americas
Plummer Terrier	United Kingdom	Europe
Podenco Andaluz	Spain	Europe
Podenco Canario	Spain	Europe
Podenco Valenciano	Spain	Europe
Poitevin Hound	France	Europe
Polish Greyhound	Poland	Europe
Polish Lowland Sheepdog	Poland	Europe
Polish Tatra Sheepdog	Poland	Europe
Pomeranian	Germany	Europe
Pont-Audemer spaniel	France	Europe
Poodle	Germany	Europe
Porcelaine	France	Europe
Portuguese Podengo	Portugal	Europe
Portuguese Podengo Pequeno	Portugal	Europe
Portuguese Pointer	Portugal	Europe
Portuguese Sheepdog	Portugal	Europe
Portuguese Water Dog	Portugal	Europe
Posavac Hound	Croatia	Europe
Prague Ratter	Czech Republic	Europe
Pshdar Dog	Iran	Asia
Pudelpointer	Germany	Europe
Pug	China	Asia
Puli	Hungary	Europe
Pumi	Hungary	Europe
Pungsan	South Korea	Asia
Pyrenean Mastiff	Spain	Europe
Pyrenean Shepherd	France	Europe
Rafeiro do Alentejo	Portugal	Europe
Rajapalayam	India	Asia
Rampur Greyhound	India	Asia
Rastreador Brazileiro	Brazil	Americas
Rat Terrier	United States	Americas
Ratonero Bodeguero Andaluz	Spain	Europe
Ratonero Murciano	Spain	Europe
Ratonero Valenciano	Spain	Europe
Redbone Coonhound	United States	Americas
Rhodesian Ridgeback	South Africa	Africa
Rize Koyun	Turkey	Asia
Rosyjski Spaniel	Russia	Europe
Rottweiler	Germany	Europe
Russell Terrier	United Kingdom	Europe
Russian Hound	Russia	Europe
Russian Toy	Russia	Europe
Russian Tsvetnaya Bolonka	Russia	Europe
Russkaya Pegaya Gonchaya	Russia	Europe
Russo-European Laika	Russia	Europe
Ryukyu Inu	Japan	Asia
Saarloos Wolfdog	Netherlands	Europe
Sabueso Espanol	Spain	Europe
Sabueso Fino Colombiano	Colombia	Americas
Saint Bernard	Switzerland	Europe
Saint Miguel Cattle Dog	Portugal	Europe
Saint-Usuge Spaniel	France	Europe
Saluki	Iran	Asia
Samoyed	Russia	Europe
Sarabi	Iran	Asia
Sarail Hound	Bangladesh	Asia
Sarplaninac	Macedonia	Europe
Schaferhunde Harzer Fuchs	Germany	Europe
Schaferhunde Ost-bzw. Mitteldeutscher	Germany	Europe
Schaferhunde Suddentsche	Germany	Europe
Schafpudel	Germany	Europe
Schapendoes	Netherlands	Europe
Schillerstovare	Sweden	Europe
Schipperke	Belgium	Europe
Scotch Collie	United Kingdom	Europe
Scottish Deerhound	United Kingdom	Europe
Scottish Terrier	United Kingdom	Europe
Sealyham Terrier	United Kingdom	Europe
Segugio dell'Appennino	Italy	Europe
Segugio Italiano	Italy	Europe
Segugio Italiano Pelo Forte	Italy	Europe
Segugio Italiano Pelo Raso	Italy	Europe
Segugio Maremmano	Italy	Europe
Serbian Hound	Serbia	Europe
Serbian Tricolor Hound	Serbia	Europe
Serrano Bulldog	Brazil	Americas
Shapendoes	Netherlands	Europe
Shar Pei	China	Asia
Shetland Sheepdog	United Kingdom	Europe
Shiba Inu	Japan	Asia
Shih Tzu	China	Asia
Shikoku	Japan	Asia
Shiloh Shepherd	United States	Americas
Shirak Sheepdog	Iran	Asia
Siberian Husky	Russia	Europe
Siegerlander Kuhhunde	Germany	Europe
Silken Windhound	United States	Americas
Silken Windsprite	United States	Americas
Silky Terrier	Australia	Oceania
Skye Terrier	United Kingdom	Europe
Sloughi	Morocco	Africa
Slovak Cuvac	Slovakia	Europe
Slovakian Wirehaired Pointer	Slovakia	Europe
Slovensky Kopov	Slovakia	Europe
Smalandstovare	Sweden	Europe
Small Munsterlander	Germany	Europe
Small Swiss Hound	Switzerland	Europe
Smithfield Dog	Australia	Oceania
Smooth Fox Terrier	United Kingdom	Europe
Soft Coated Wheaten Terrier	Ireland	Europe
South Russian Ovcharka	Russia	Europe
Spanish Mastiff	Spain	Europe
Spanish Water Dog	Spain	Europe
Spino degli Iblei	Italy	Europe
Spinone Italiano	Italy	Europe
Stabyhoun	Netherlands	Europe
Staffordshire Bull Terrier	United Kingdom	Europe
Staffordshire Terrier	United Kingdom	Europe
Standard Poodle	Germany	Europe
Standard Schnauzer	Germany	Europe
Stone Corners Cattledog	Italy	Europe
Strobel	Germany	Europe
Styrian Course Haired Hound	Austria	Europe
Sulimov Dog	Russia	Europe
Sussex Spaniel	United Kingdom	Europe
Swedish Elkhound	Sweden	Europe
Swedish Lapphund	Sweden	Europe
Swedish Vallhund	Sweden	Europe
Swedish White Elkhound	Sweden	Europe
Swiss Hound	Switzerland	Europe
Taigan	Kyrgyzstan	Asia
Tamaskan	United Kingdom	Europe
Tazi	Afghanistan	Asia
Tazy	Kazakhstan	Asia
Teddy Roosevelt Terrier	United States	Americas
Telomian	Malaysia	Asia
Tenterfield Terrier	Australia	Oceania
Texas Blue Lacy	United States	Americas
Thai Bankaew Dog	Thailand	Asia
Thai Ridgeback	Thailand	Asia
Tibetan Spaniel	China	Asia
Tibetan Terrier	China	Asia
Tobet	Kazakhstan	Asia
Torkuz	Uzbekistan	Asia
Tornjak	Croatia	Europe
Tosa Inu	Japan	Asia
Toy Fox Terrier	United States	Americas
Toy Manchester Terrier	United Kingdom	Europe
Toy Poodle	Germany	Europe
Toy Xoloitxcuintli	Mexico	Americas
Translyvanian Hound	Hungary	Europe
Treeing Cur	United States	Americas
Treeing Tennessee Brindle	United States	Americas
Treeing Walker Coonhound	United States	Americas
Turkish Mastiff	Turkey	Asia
Turkish Zerdava	Turkey	Asia
Tyrolean Hound	Austria	Europe
Utonagan	United Kingdom	Europe
Veadeiro Pampeano	Brazil	Americas
Villano de las Encartaciones	Spain	Europe
Villanuco de las Encartaciones	Spain	Europe
Vizsla	Hungary	Europe
Volpino Italiano	Italy	Europe
Weimaraner	Germany	Europe
Welsh Hound	United Kingdom	Europe
Welsh Sheepdog	United Kingdom	Europe
Welsh Springer Spaniel	United Kingdom	Europe
Welsh Terrier	United Kingdom	Europe
West Highland White Terrier	United Kingdom	Europe
West Siberian Laika	Russia	Europe
Westerwalder Kuhhunde	Germany	Europe
Wetterhoun	Netherlands	Europe
Whippet	United Kingdom	Europe
White Swiss Shepherd Dog	Switzerland	Europe
Wire Fox Terrier	United Kingdom	Europe
Wirehaired Pointing Griffon	Netherlands	Europe
Wirehaired Vizsla	Hungary	Europe
Xiasi Dog	China	Asia
Xigou	China	Asia
Xoloitzcuintli	Mexico	Americas
Yakutian Laika	Russia	Europe
Yorkshire Terrier	United Kingdom	Europe
Zagar	Turkey	Asia
